# Supplementary material for: Synthesis and Strong Solvatochromism of Push-Pull Thienylthiazole Boron Complexes
Source: MDPI journal article supplement (doi:10.3390/molecules27175510), 2022-08-27
Supplement: s1 [file s1]

## Supporting Information

### Synthesis and Strong Solvatochromism of Push-Pull Thienylthiazole Boron Complexes

Martijn J. Wildervanck,<sup>a,b</sup> Reinhard Hecht,<sup>b</sup> Agnieszka Nowak-Król,<sup>a,b</sup>

<sup>a</sup> *Institut für Anorganische Chemie and Institute for Sustainable Chemistry & Catalysis with Boron, Universität Würzburg, 97074 Würzburg, Germany*

<sup>b</sup> *Institut für Organische Chemie and Center for Nanosystems Chemistry, Universität Würzburg, 97074 Würzburg, Germany*

E-mail: agnieszka.nowak-krol@uni-wuerzburg.de

#### Table of contents

|                                                        |    |
|--------------------------------------------------------|----|
| 1. NMR and MS Spectra .....                            | 2  |
| 2. Solvent effect .....                                | 9  |
| 3. Calculation of HOMO/LUMO levels and band gaps ..... | 16 |
| 4. Computations.....                                   | 17 |
| 5. References.....                                     | 99 |

## 1. NMR and MS Spectra

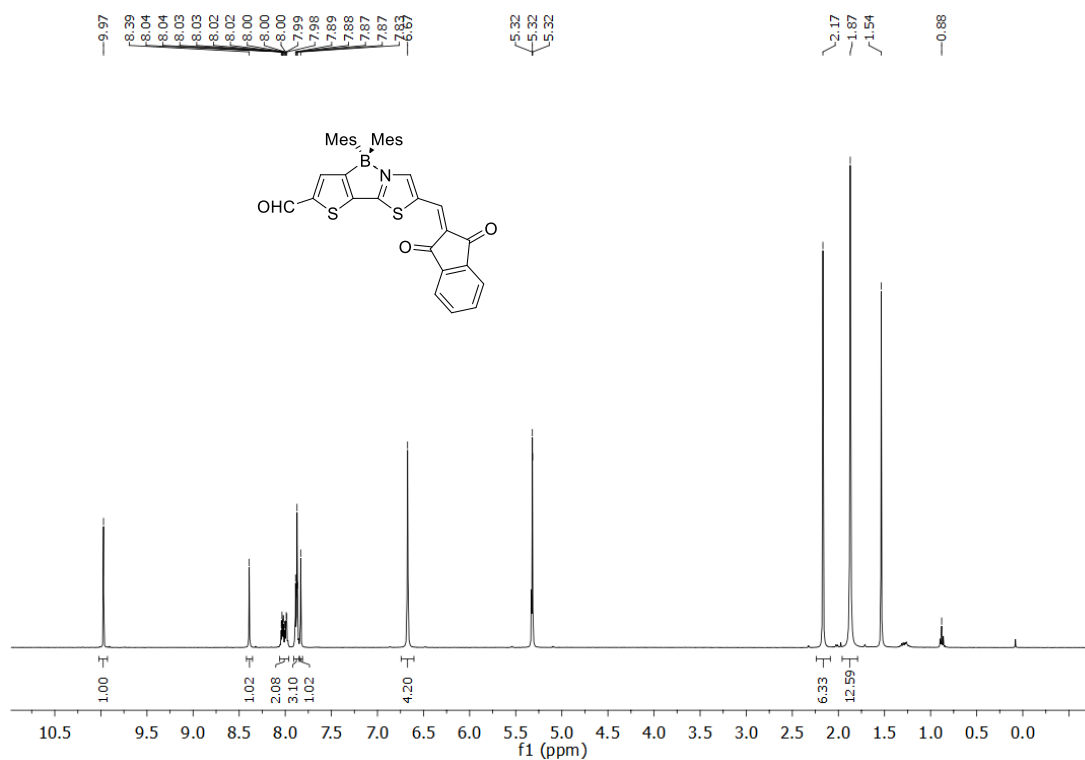

**Figure S1.** <sup>1</sup>H NMR of compound **7** (400 MHz, CD<sub>2</sub>Cl<sub>2</sub>, 25 °C).

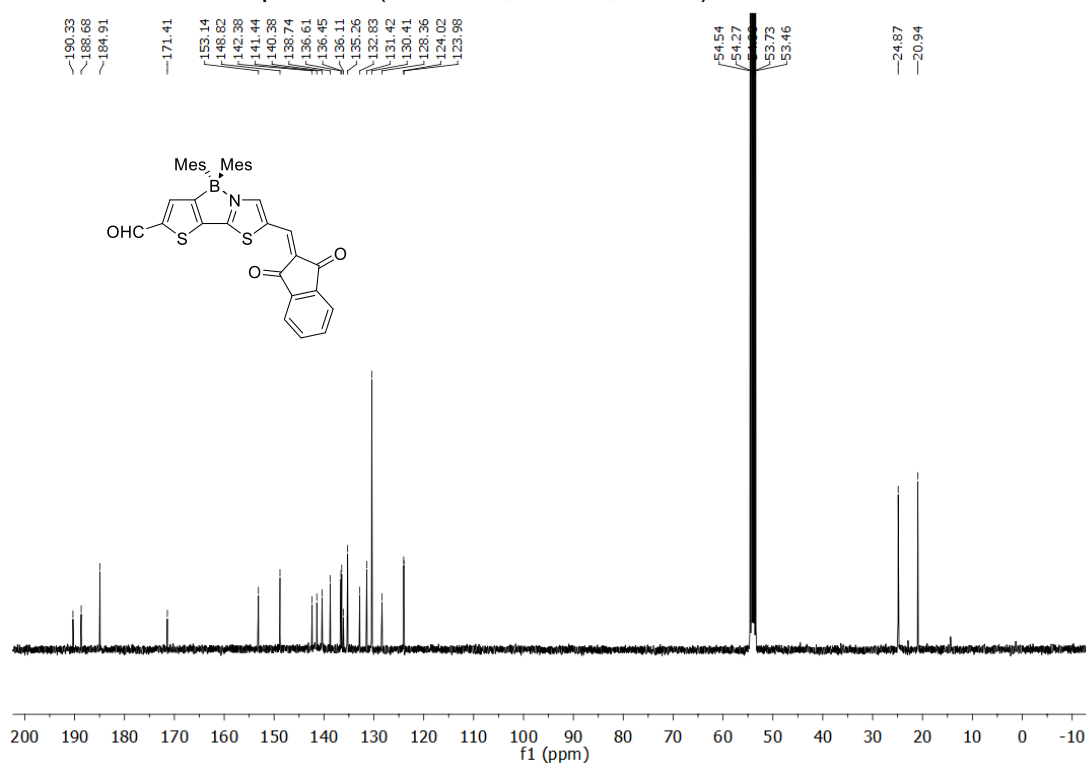

**Figure S2.** <sup>13</sup>C NMR of compound **7** (101 MHz, CD<sub>2</sub>Cl<sub>2</sub>, 25 °C).

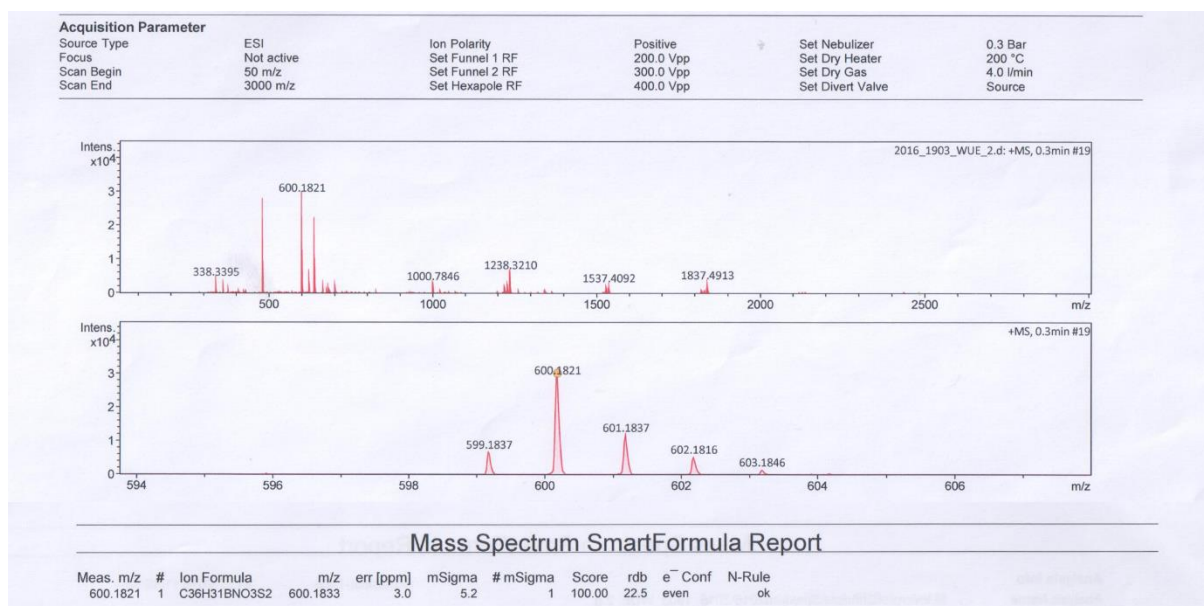

**Figure S3.** HRMS (ESI) spectrum of compound **7**.

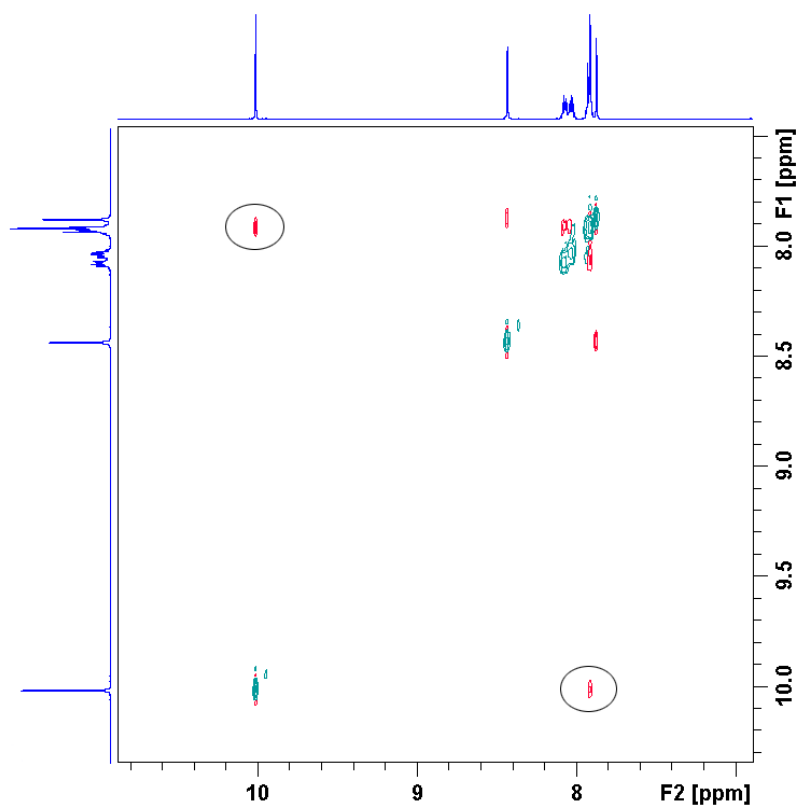

**Figure S4.** NOESY spectrum of **7**.

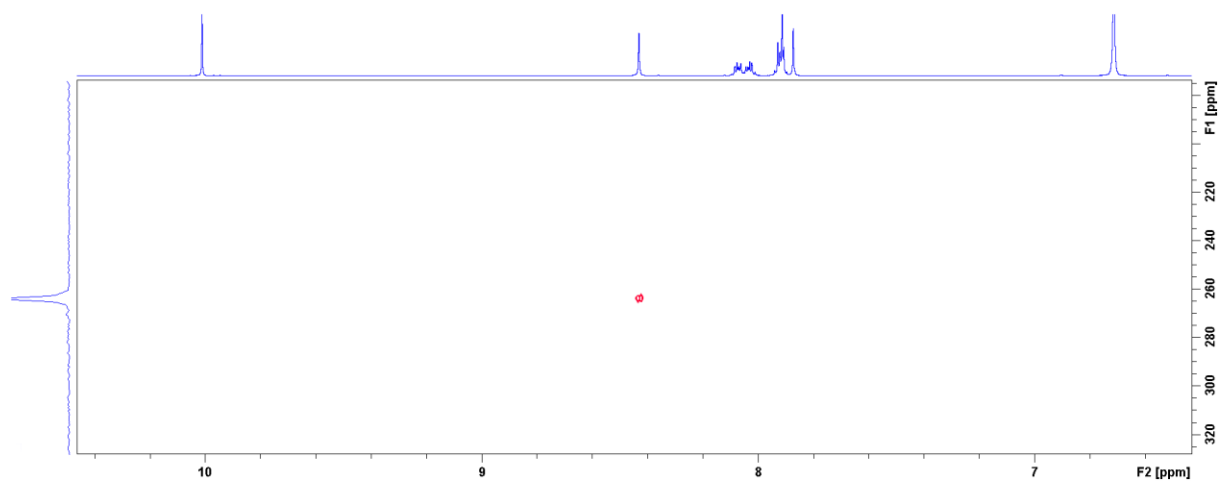

**Figure S5.**  $^1\text{H}$ ,  $^{15}\text{N}$  HMBC spectrum **7**.

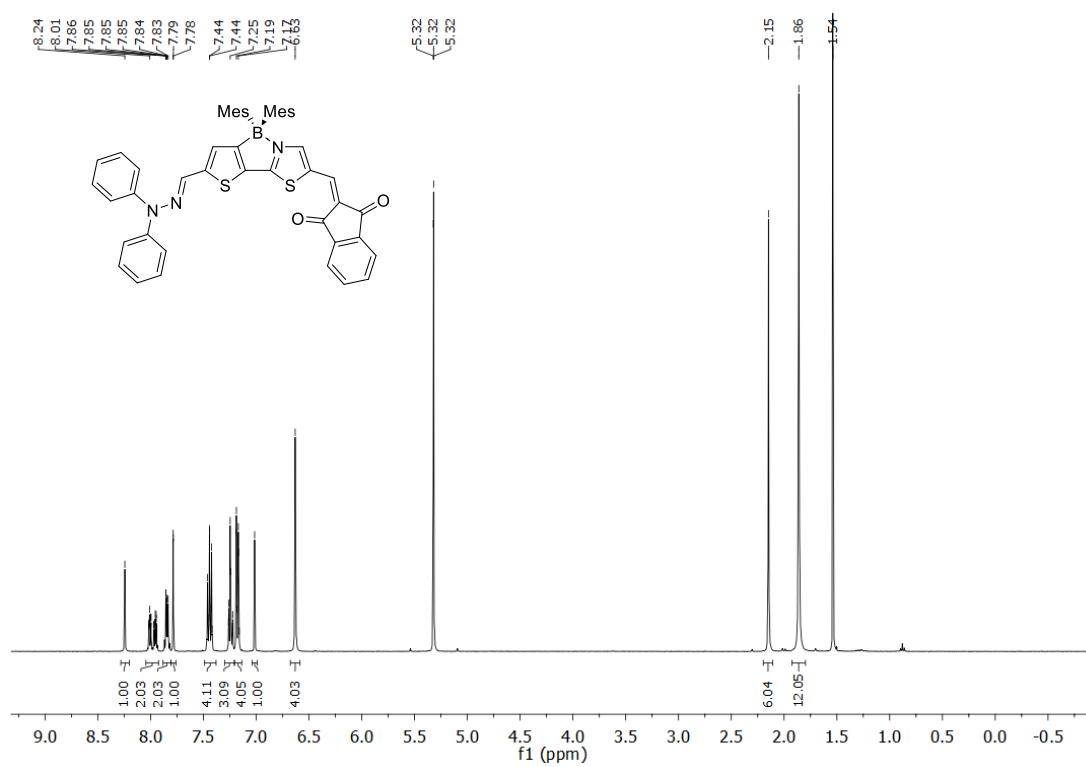

**Figure S6.**  $^1\text{H}$  NMR of compound **2** (400 MHz,  $\text{CD}_2\text{Cl}_2$ , 25  $^\circ\text{C}$ ).

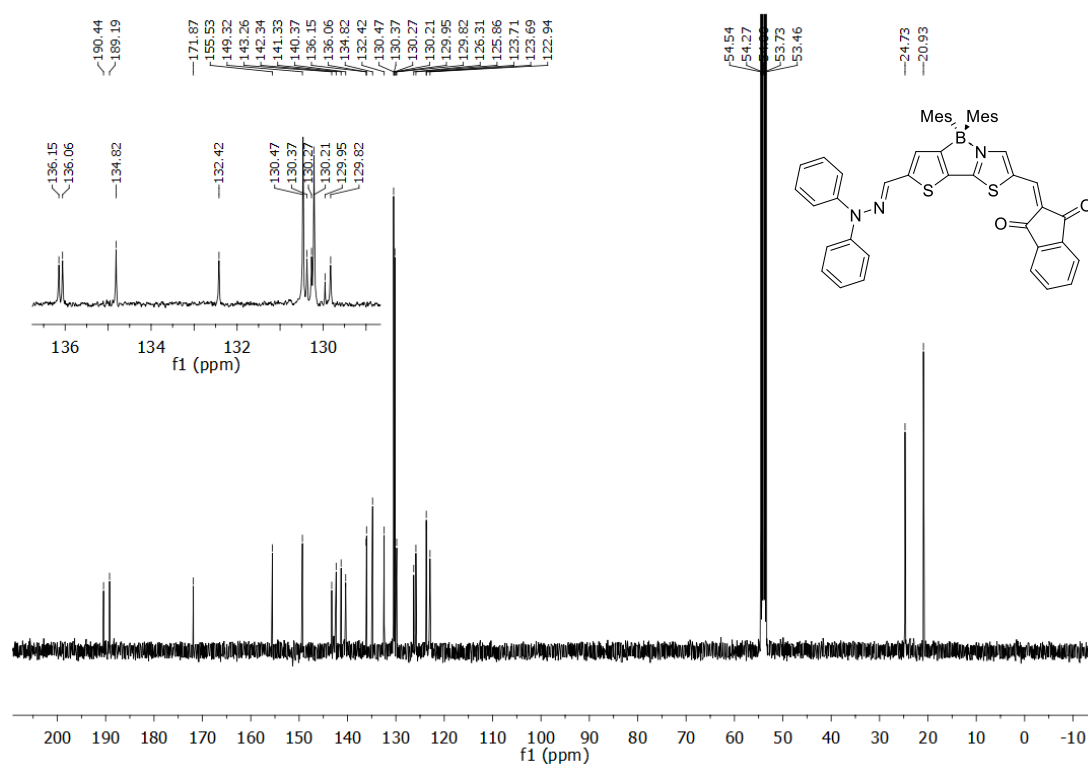

**Figure S7.** <sup>13</sup>C NMR of compound **2** (101 MHz, CD<sub>2</sub>Cl<sub>2</sub>, 25 °C).

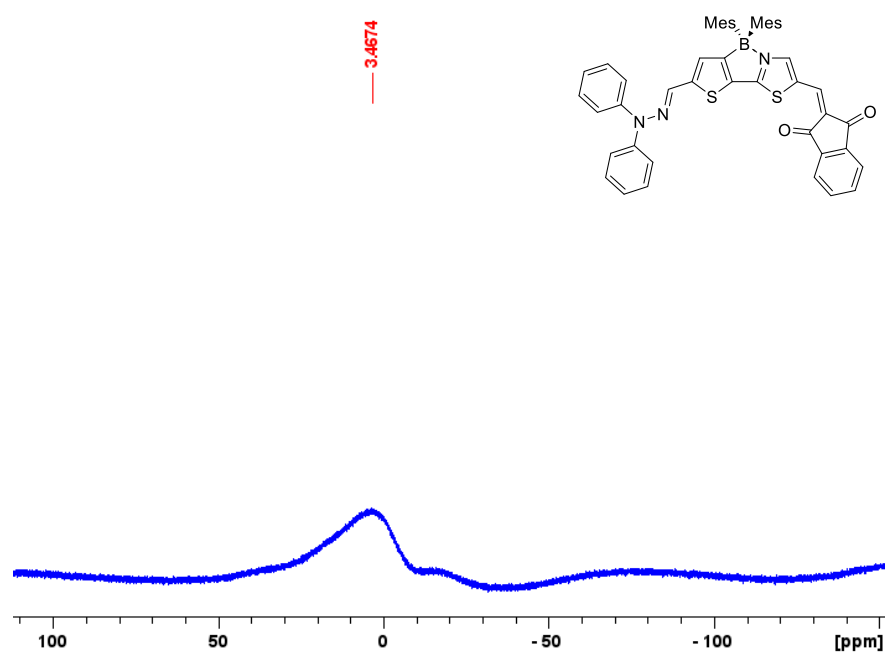

**Figure S8.** <sup>11</sup>B NMR of compound **2** (128 MHz, CD<sub>2</sub>Cl<sub>2</sub>, 25 °C).

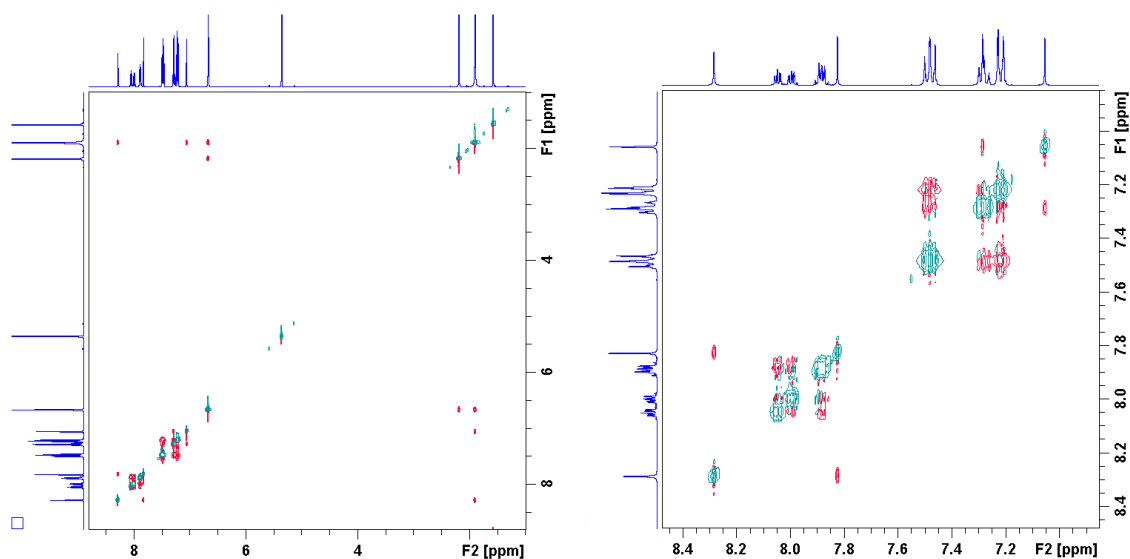

**Figure S9.** NOESY spectrum of **2**.

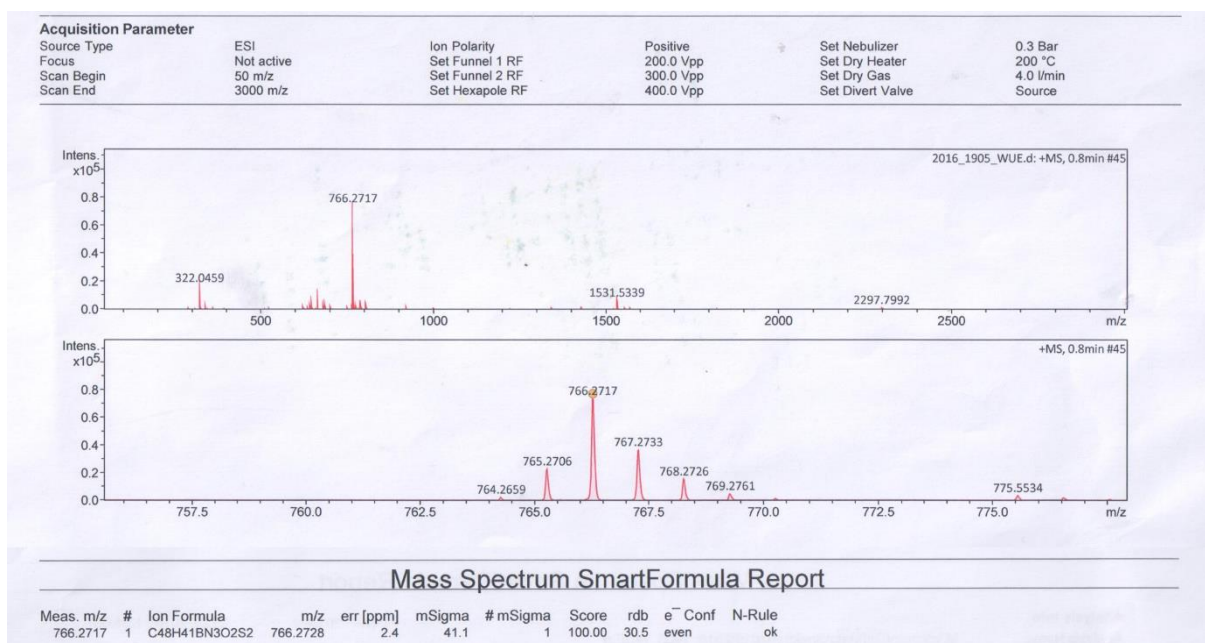

**Figure S10.** HRMS (ESI) spectrum of **2**.

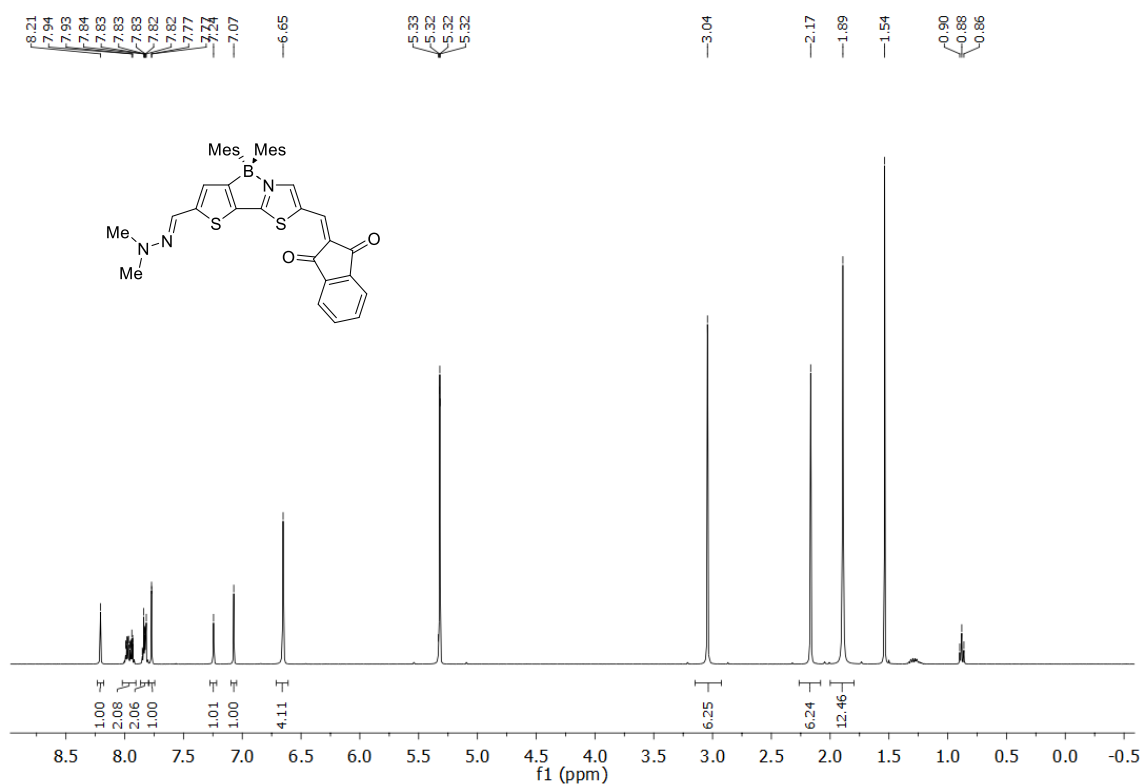

**Figure S11.** <sup>1</sup>H NMR of compound **3** (400 MHz, CD<sub>2</sub>Cl<sub>2</sub>, 25 °C).

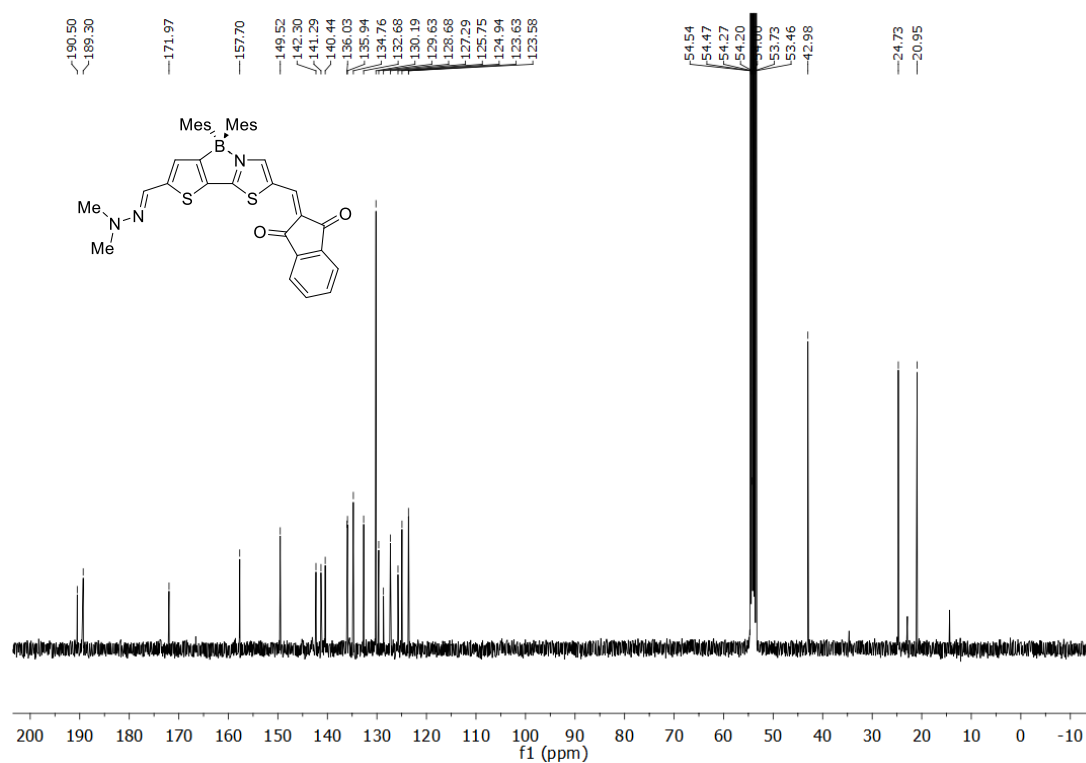

**Figure S12.** <sup>13</sup>C NMR of compound **3** (101 MHz, CD<sub>2</sub>Cl<sub>2</sub>, 25 °C).

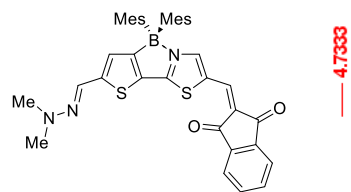

4.7333

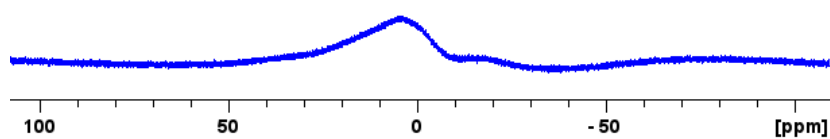

**Figure S13.**  $^{11}\text{B}$  NMR of compound **3** (128 MHz,  $\text{CD}_2\text{Cl}_2$ , 25 °C).

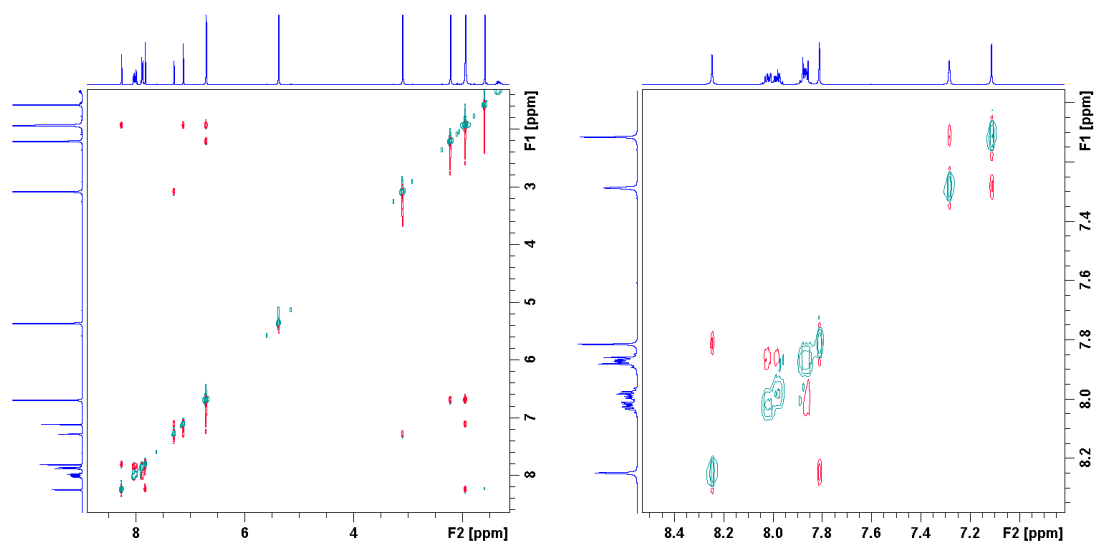

**Figure S14.** NOESY spectrum of **3**.

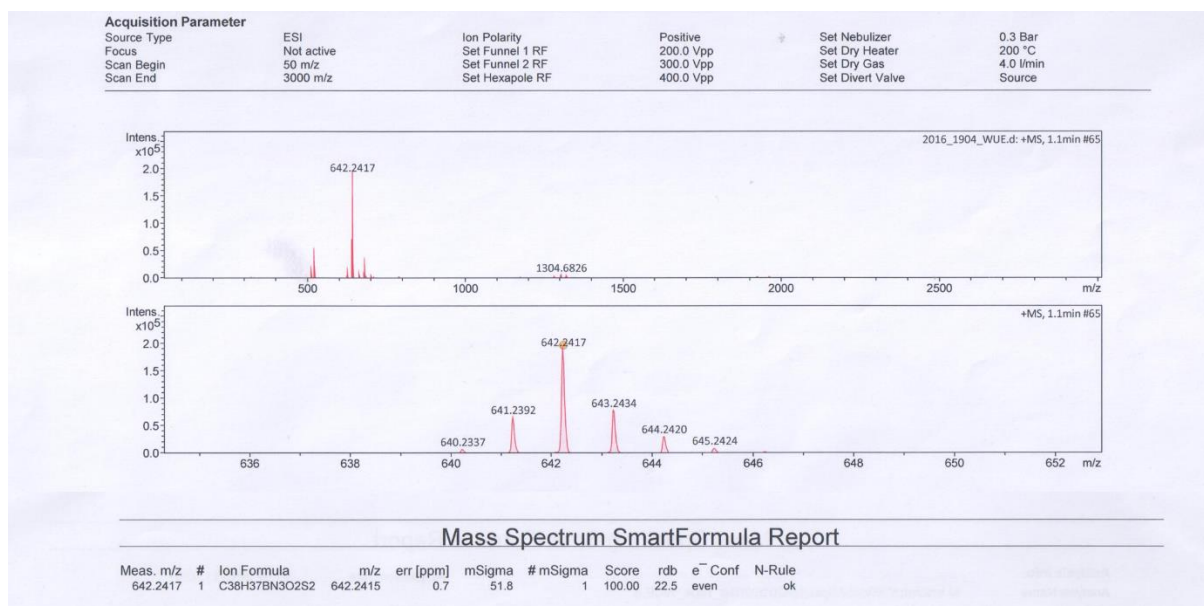

**Figure S15.** HRMS (ESI) spectrum of compound **3**.

## 2. Solvent effect

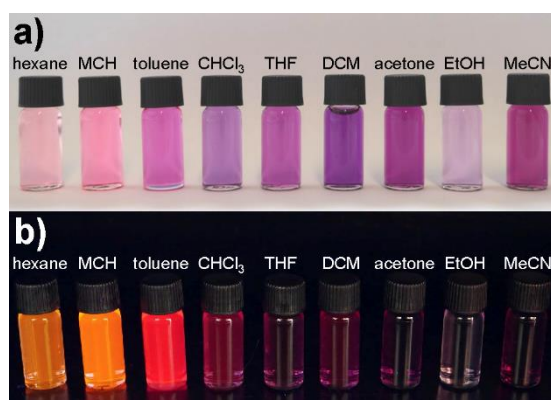

**Figure S16.** Images of **2** in solvents of varied polarity under visible light (top), and UV light (bottom).

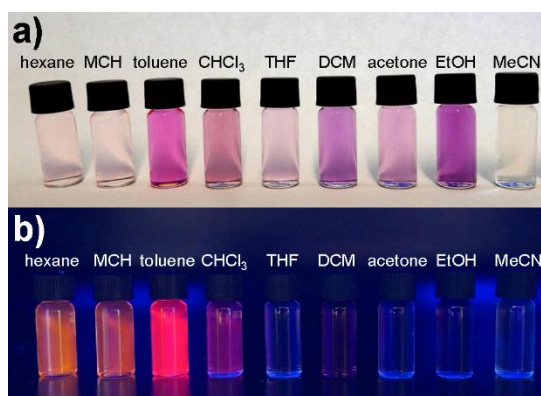

**Figure S17.** Images of **3** in solvents of varied polarity under visible light (top), and UV light (bottom).

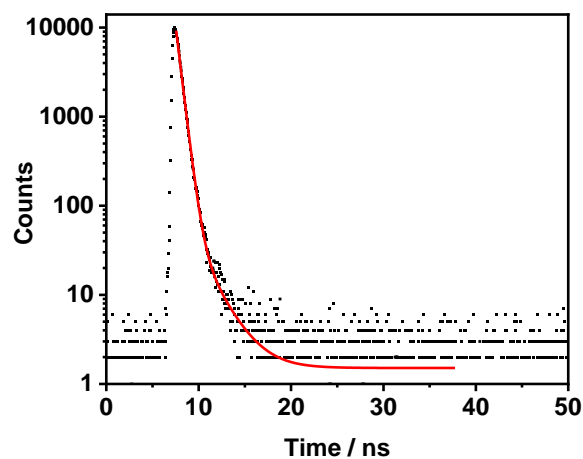

**Figure S18.** Fluorescence decay of **2** in *n*-hexane at 298 K in air.

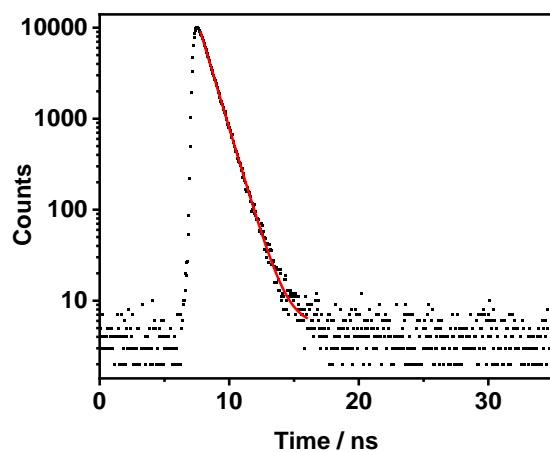

**Figure S19.** Fluorescence decay of **2** in MCH at 298 K in air.

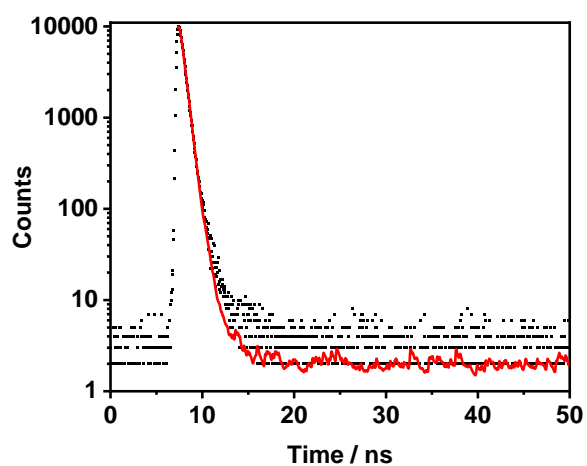

**Figure S20.** Fluorescence decay of **2** in toluene at 298 K in air.

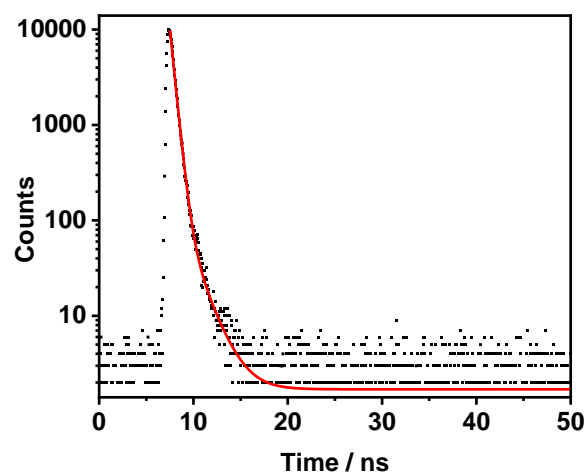

**Figure S21.** Fluorescence decay of **2** in  $\text{CHCl}_3$  at 298 K in air.

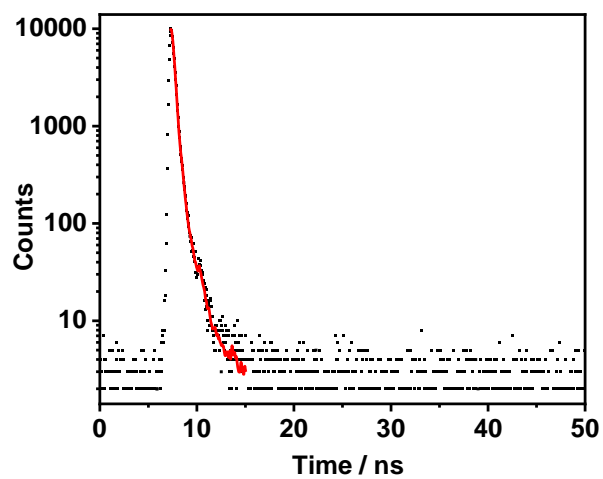

**Figure S22.** Fluorescence decay of **2** in THF at 298 K in air.

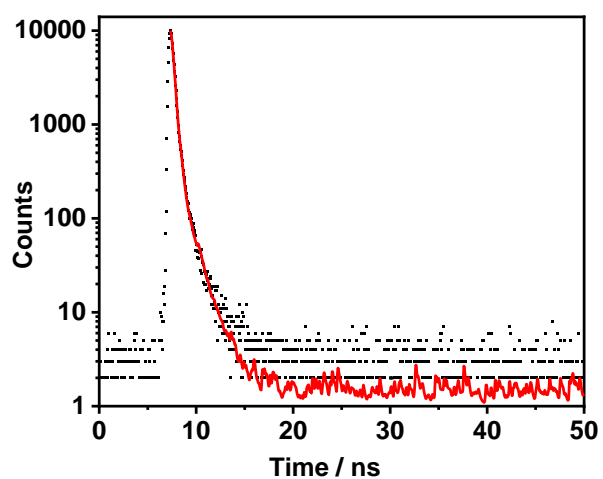

**Figure S23.** Fluorescence decay of **2** in  $\text{CH}_2\text{Cl}_2$  at 298 K in air.

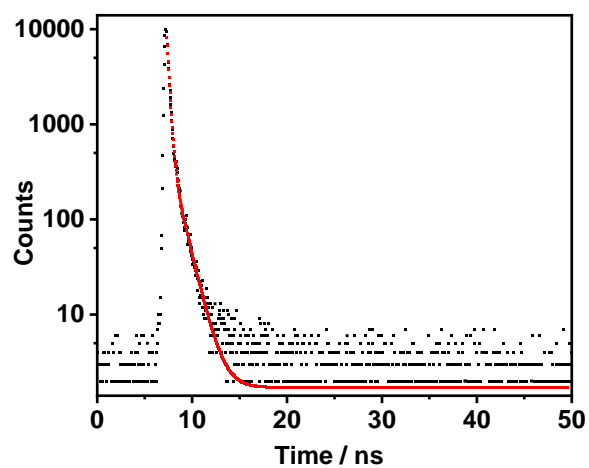

**Figure S24.** Fluorescence decay of **2** in acetone at 298 K in air.

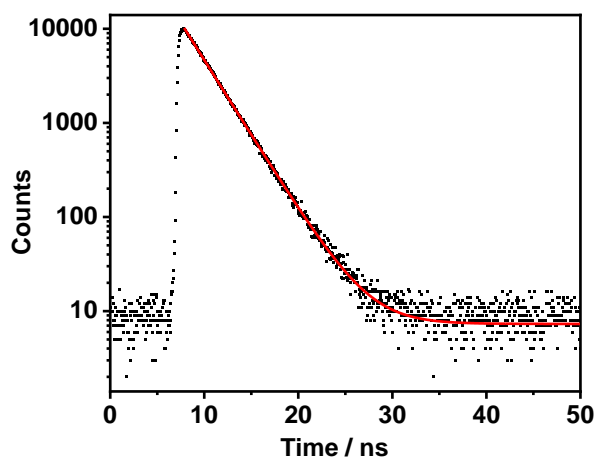

**Figure S25.** Fluorescence decay of **3** in *n*-hexane at 298 K in air.

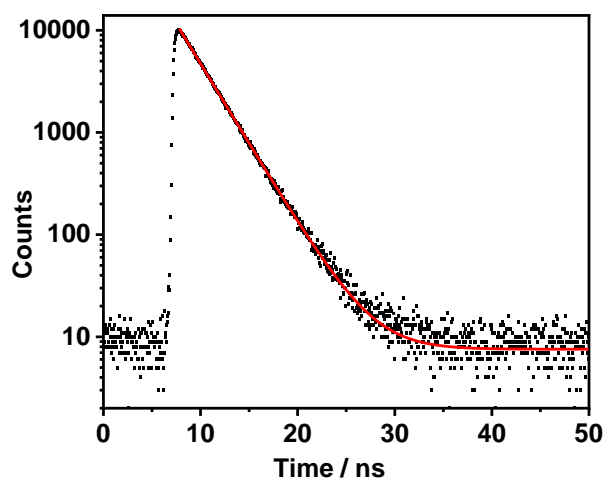

**Figure S26.** Fluorescence decay of **3** in MCH at 298 K in air.

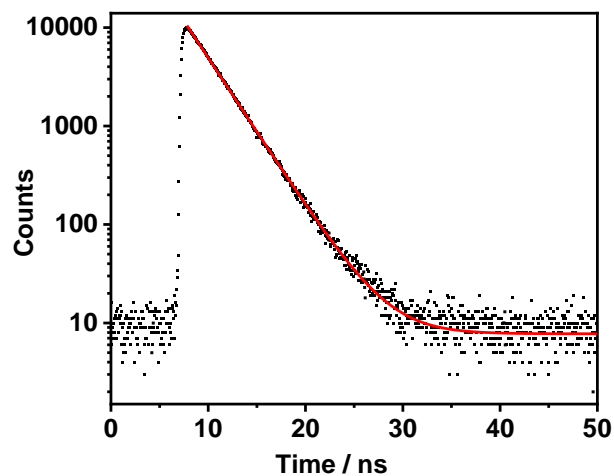

**Figure S27.** Fluorescence decay of **3** in toluene at 298 K in air.

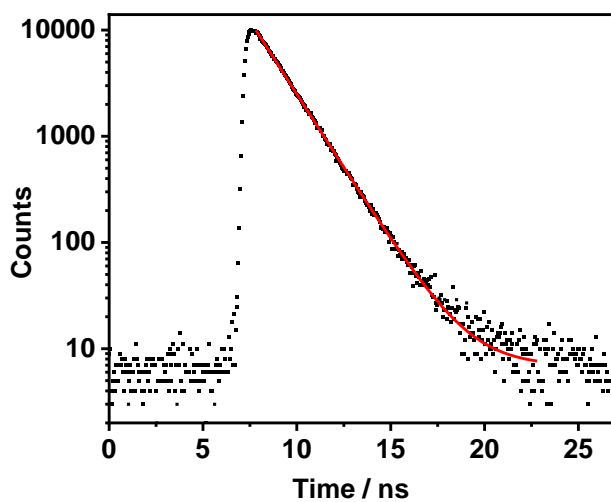

**Figure S28.** Fluorescence decay of **3** in CHCl<sub>3</sub> at 298 K in air.

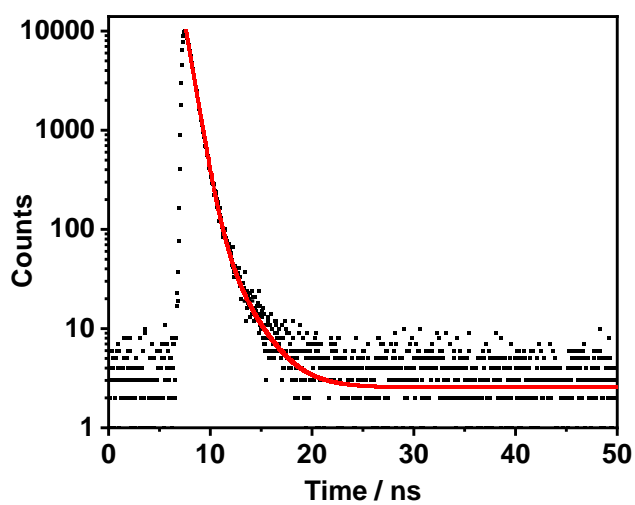

**Figure S29.** Fluorescence decay of **3** in THF at 298 K in air.

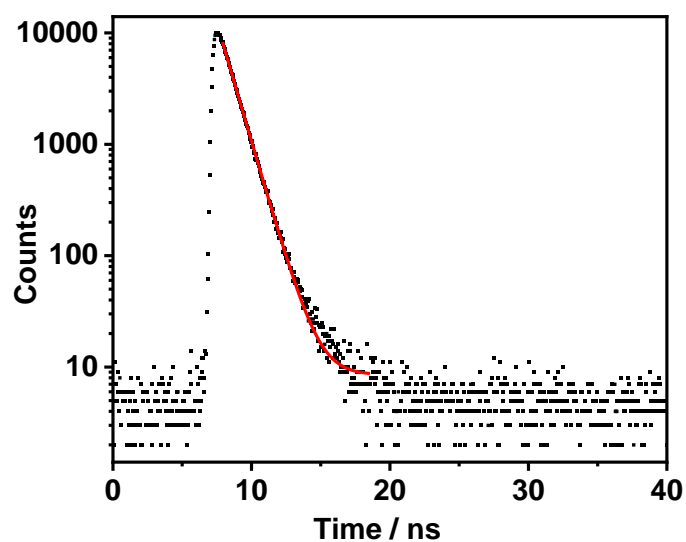

**Figure S30.** Fluorescence decay of **3** in  $\text{CH}_2\text{Cl}_2$  at 298 K in air.

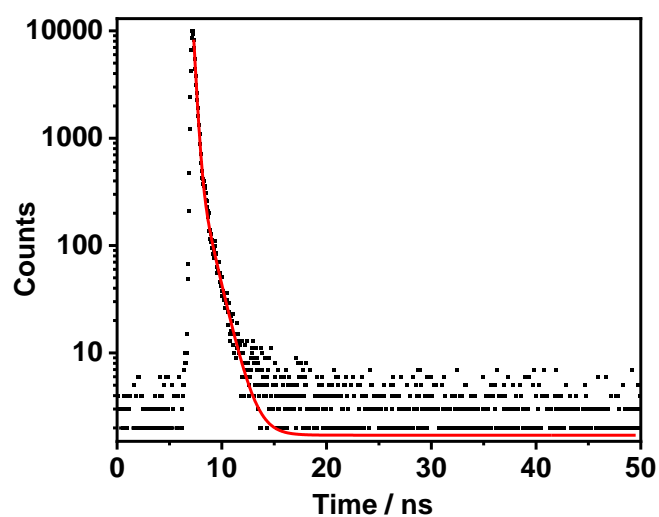

**Figure S31.** Fluorescence decay of **3** in acetone at 298 K in air.

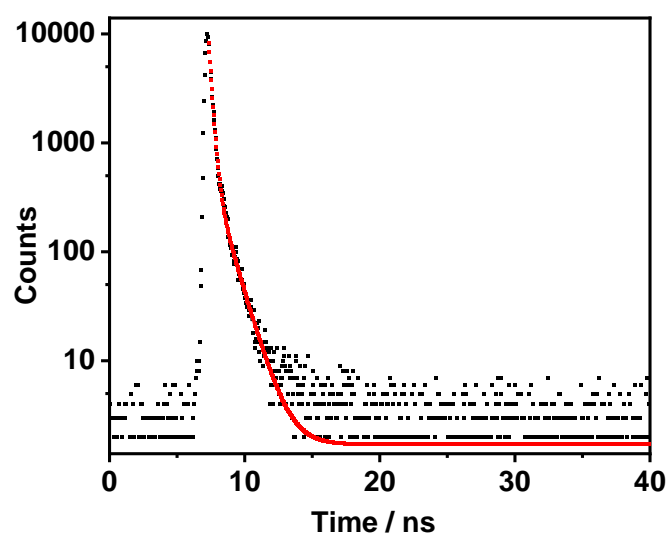

**Figure S32.** Fluorescence decay of **3** in EtOH at 298 K in air.

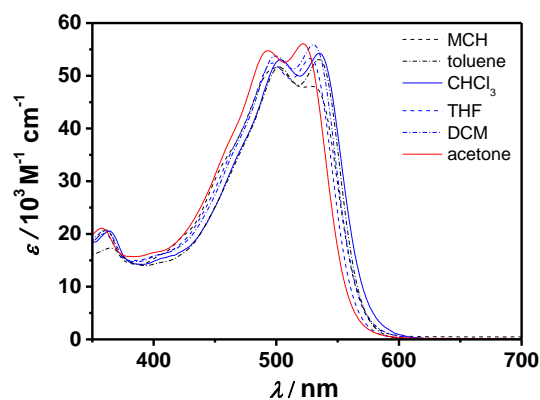

**Figure S33.** UV/Vis absorption of **1b** in solvents of varied polarity (colors according to relative permittivity  $\epsilon_r$ : black lines for  $\epsilon_r < 3$ ; blue lines for  $3 < \epsilon_r < 10$ ; red lines for  $\epsilon_r > 10$ ) measured at  $c = 10^{-5} \text{ M} - 10^{-6} \text{ M}$ .

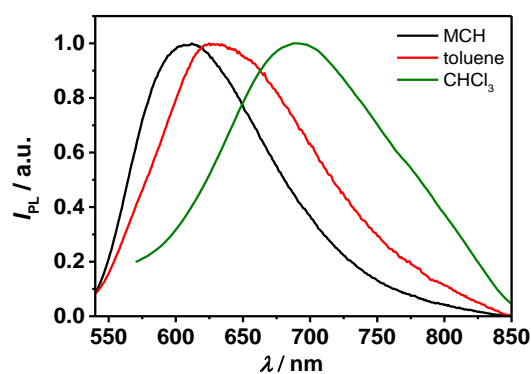

**Figure S34.** Photoluminescence spectra of **1b** in solvents of varied polarity determined by optical dilution method ( $\text{OD} < 0.05$ ) [1].

**Table S1.** Optical properties of A- $\pi$ -A compound **1b** in solvents of varied polarity.

| Cpd       | solvent           | $\epsilon_r^a$ | $\lambda_{\text{abs}}^b$<br>[nm] | $\epsilon_{\text{max}}^c$<br>[10 <sup>3</sup> M <sup>-1</sup> cm <sup>-1</sup> ] | $\lambda_{\text{em}}^d$<br>[nm] | $\Delta\tilde{\nu}^e$<br>[cm <sup>-1</sup> ] | $\Phi_{\text{fl}}^f$<br>[%] |
|-----------|-------------------|----------------|----------------------------------|----------------------------------------------------------------------------------|---------------------------------|----------------------------------------------|-----------------------------|
| <b>1b</b> | MCH               | 2.02           | 531                              | 48.0                                                                             | 612                             | 2740                                         | 6 $\pm$ 0.4                 |
|           |                   |                | 500                              | 51.6                                                                             |                                 |                                              |                             |
|           | toluene           | 2.38           | 535                              | 53.2                                                                             | 625                             | 3240                                         | 4 $\pm$ 0.3                 |
|           |                   |                | 503                              | 51.7                                                                             |                                 |                                              |                             |
|           | CHCl <sub>3</sub> | 4.8            | 535                              | 54.3                                                                             | 688                             | 4470                                         | < 1                         |
|           |                   |                | 504                              | 53.0                                                                             |                                 |                                              |                             |
|           | THF               | 7.6            | 528                              | 53.3                                                                             | — <sup>g</sup>                  | —                                            | —                           |
|           |                   |                | 497                              | 52.4                                                                             |                                 |                                              |                             |
|           | DCM               | 9.1            | 530                              | 55.9                                                                             | — <sup>g</sup>                  | —                                            | —                           |
|           |                   |                | 499                              | 53.8                                                                             |                                 |                                              |                             |
|           | acetone           | 20.6           | 522                              | 56.0                                                                             | — <sup>g</sup>                  | —                                            | —                           |
|           |                   |                | 494                              | 54.8                                                                             |                                 |                                              |                             |

<sup>a</sup>Relative permittivity at 20°C. <sup>b</sup>Absorption maximum and a vibronic progression. <sup>c</sup>Molar absorption coefficient. <sup>d</sup>Fluorescence maximum. <sup>e</sup>Stokes shift. <sup>f</sup>Relative fluorescence quantum yield determined by optical dilution method. <sup>g</sup>Non-fluorescent.

### 3. Calculation of HOMO/LUMO levels and band gaps

The HOMO/LUMO energy levels were calculated according to the following equations:

$$E_{\text{HOMO}} = -e E_{1/2}^{\text{ox}} - 5.15 \text{ eV. (eq. S1) [2]}$$

$$E_{\text{LUMO}} = -e E_{1/2}^{\text{red}} - 5.15 \text{ eV (eq. S2)}$$

The electrochemical band gaps were calculated according to the following equation:

$$E_{\text{g}}^{\text{CV}} = E_{1/2}^{\text{ox}} - E_{1/2}^{\text{red}} \text{ (eq. S3)}$$

**Table S2.** Optical and electrochemical properties of **2**, **3**, and **7** in CH<sub>2</sub>Cl<sub>2</sub>.

| Dye      | $\lambda_{\text{abs}}^a$<br>[nm] | $E_{1/2}^{\text{red}b}$<br>[V] | $E_{1/2}^{\text{ox}b}$<br>[V] | $E_{\text{g}}^{\text{CV}d}$<br>[eV] | $E_{\text{HOMO}}$<br>[eV] | $E_{\text{LUMO}}$<br>[eV] |
|----------|----------------------------------|--------------------------------|-------------------------------|-------------------------------------|---------------------------|---------------------------|
| <b>2</b> | 571                              | −1.32 <sup>c</sup>             | +0.65 <sup>c</sup>            | 1.97                                | −5.80                     | −3.83                     |
| <b>3</b> | 556                              | −1.36 <sup>c</sup>             | +0.51 <sup>c</sup>            | 1.87                                | −5.66                     | −3.79                     |
| <b>7</b> | 432                              | −1.21 <sup>c</sup>             | +1.08 <sup>c</sup>            | 2.29                                | −6.23                     | −3.94                     |

<sup>a</sup>Absorption maximum. <sup>b</sup>Redox potentials vs. Fc<sup>+</sup>/Fc in CH<sub>2</sub>Cl<sub>2</sub> (*c* ~ 2.5); scan rate: 100 mV s<sup>-1</sup>; supporting electrolyte: Bu<sub>4</sub>NPF<sub>6</sub> (0.1 M). <sup>c</sup>Peak potential. <sup>d</sup>Electrochemical band gap.

## 4. Computations

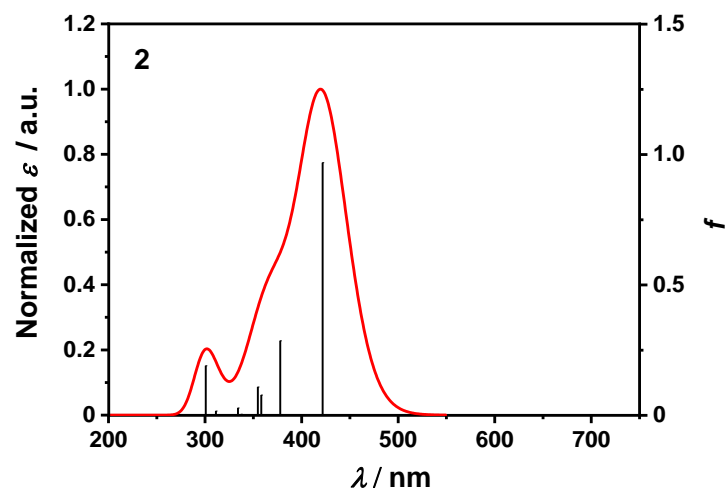

**Figure S35.** TD-DFT-calculated UV/Vis absorption spectrum of **7** at the CAM-B3LYP-D3(BJ)/def2-SVP (solvent CH<sub>2</sub>Cl<sub>2</sub>, PCM model) level of theory.

**Table S3.** TD-DFT calculated UV/vis absorption data for **7** at the CAM-B3LYP-D3(BJ)/def2-SVP (solvent CH<sub>2</sub>Cl<sub>2</sub>, PCM model) level (H = HOMO, L = LUMO, L+1 = LUMO+1, etc.).

|   | Calcd $\lambda$<br>[nm] | Oscillator strength ( $f$ ) | Composition            | Coefficient | Contribution |
|---|-------------------------|-----------------------------|------------------------|-------------|--------------|
| 1 | 421.7                   | 0.9692                      | H-5 $\rightarrow$ L    | -0.24933    | 12%          |
|   |                         |                             | H-3 $\rightarrow$ L    | 0.16464     | 5%           |
|   |                         |                             | H-2 $\rightarrow$ L    | -0.1921     | 7%           |
|   |                         |                             | H $\rightarrow$ L      | 0.5774      | 67%          |
|   |                         |                             | H $\rightarrow$ L+1    | 0.1047      | 2%           |
| 2 | 377.77                  | 0.2864                      | H-5 $\rightarrow$ L    | 0.30309     | 18%          |
|   |                         |                             | H-3 $\rightarrow$ L    | -0.21855    | 10%          |
|   |                         |                             | H-2 $\rightarrow$ L    | 0.43906     | 39%          |
|   |                         |                             | H $\rightarrow$ L      | 0.32444     | 21%          |
|   |                         |                             | H $\rightarrow$ L+1    | 0.12708     | 3%           |
| 3 | 358.22                  | 0.0782                      | H-13 $\rightarrow$ L+1 | 0.11274     | 3%           |
|   |                         |                             | H-13 $\rightarrow$ L+2 | -0.16638    | 6%           |
|   |                         |                             | H-7 $\rightarrow$ L    | 0.45041     | 41%          |
|   |                         |                             | H-7 $\rightarrow$ L+1  | -0.23923    | 11%          |
|   |                         |                             | H-5 $\rightarrow$ L    | 0.22596     | 10%          |
|   |                         |                             | H-3 $\rightarrow$ L    | -0.16944    | 6%           |
|   |                         |                             | H-2 $\rightarrow$ L    | -0.27476    | 15%          |
| 4 | 354.61                  | 0.1093                      | H-13 $\rightarrow$ L+2 | -0.12905    | 3%           |
|   |                         |                             | H-7 $\rightarrow$ L    | 0.3253      | 21%          |
|   |                         |                             | H-7 $\rightarrow$ L+1  | -0.15703    | 5%           |
|   |                         |                             | H-5 $\rightarrow$ L    | -0.27427    | 15%          |
|   |                         |                             | H-3 $\rightarrow$ L    | 0.22851     | 10%          |
|   |                         |                             | H-2 $\rightarrow$ L    | 0.40628     | 33%          |
| 5 | 337.41                  | 0.0047                      | H-11 $\rightarrow$ L   | 0.10801     | 2%           |
|   |                         |                             | H-10 $\rightarrow$ L   | 0.42366     | 36%          |

|    |        |        |             |          |     |
|----|--------|--------|-------------|----------|-----|
|    |        |        | H-10 -> L+1 | 0.33016  | 22% |
|    |        |        | H-10 -> L+2 | 0.18517  | 7%  |
|    |        |        | H-10 -> L+3 | -0.26033 | 14% |
|    |        |        | H-10 -> L+4 | -0.10274 | 2%  |
|    |        |        | H-10 -> L+5 | -0.10056 | 2%  |
|    |        |        | H-3 -> L    | 0.11606  | 3%  |
| 6  | 336.37 | 0.0001 | H-13 -> L   | -0.29983 | 18% |
|    |        |        | H-13 -> L+1 | 0.15856  | 5%  |
|    |        |        | H-13 -> L+2 | 0.1125   | 3%  |
|    |        |        | H-7 -> L+1  | -0.24059 | 12% |
|    |        |        | H-7 -> L+2  | 0.50504  | 51% |
|    |        |        | H-7 -> L+12 | -0.13446 | 4%  |
| 7  | 334.05 | 0.0288 | H-5 -> L    | 0.39468  | 31% |
|    |        |        | H-3 -> L    | 0.54202  | 59% |
| 8  | 321.04 | 0.0022 | H-5 -> L    | 0.1612   | 5%  |
|    |        |        | H-4 -> L    | 0.66933  | 90% |
| 9  | 311.19 | 0.017  | H-6 -> L    | 0.44342  | 39% |
|    |        |        | H-6 -> L+1  | 0.11114  | 2%  |
|    |        |        | H-5 -> L+1  | 0.21375  | 9%  |
|    |        |        | H-3 -> L+1  | -0.1514  | 5%  |
|    |        |        | H-2 -> L+1  | 0.14266  | 4%  |
|    |        |        | H -> L      | 0.1183   | 3%  |
|    |        |        | H -> L+1    | -0.34022 | 23% |
|    |        |        | H -> L+2    | -0.11195 | 3%  |
| 10 | 300.68 | 0.1904 | H-8 -> L    | 0.15153  | 5%  |
|    |        |        | H-6 -> L    | 0.45766  | 42% |
|    |        |        | H-6 -> L+1  | 0.17264  | 6%  |
|    |        |        | H-5 -> L+1  | -0.1999  | 8%  |
|    |        |        | H-3 -> L+1  | 0.15616  | 5%  |
|    |        |        | H-2 -> L+1  | -0.11377 | 3%  |
|    |        |        | H -> L+1    | 0.33111  | 22% |

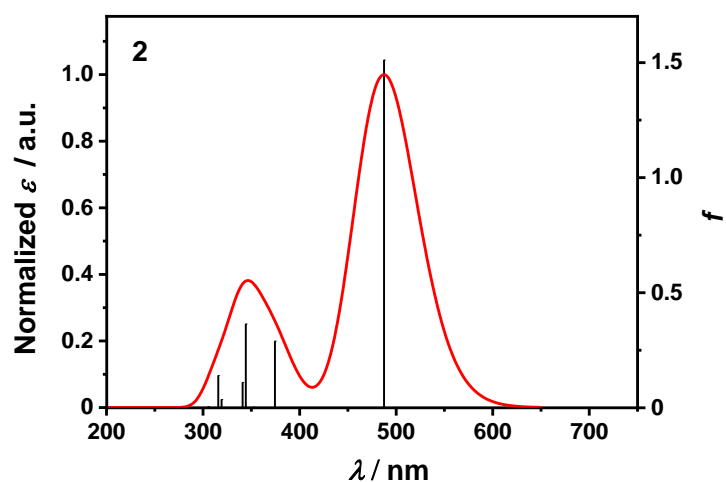

**Figure S36.** TD-DFT-calculated UV/Vis absorption spectrum of **2** at the CAM-B3LYP(BJ)/def2-SVP (solvent CH<sub>2</sub>Cl<sub>2</sub>, PCM model) level of theory.

**Table S4.** TD-DFT-calculated UV/Vis absorption data for **2** at the CAM-B3LYP-D3(BJ)/def2-SVP (solvent CH<sub>2</sub>Cl<sub>2</sub>, PCM model) level (H = HOMO, L = LUMO, L+1 = LUMO+1, etc.).

|   | Calcd $\lambda$ (nm) | Oscillator strength ( $f$ ) | Composition            | Coefficient | Contribution |
|---|----------------------|-----------------------------|------------------------|-------------|--------------|
| 1 | 487.32               | 1.5114                      | H-5 $\rightarrow$ L    | 0.1586      | 5%           |
|   |                      |                             | H $\rightarrow$ L      | 0.63379     | 80%          |
|   |                      |                             | H $\rightarrow$ L+2    | 0.165       | 5%           |
| 2 | 374.34               | 0.2907                      | H-1 $\rightarrow$ L    | 0.64636     | 84%          |
|   |                      |                             | H-1 $\rightarrow$ L+2  | 0.15569     | 5%           |
|   |                      |                             | H $\rightarrow$ L+2    | 0.10823     | 2%           |
| 3 | 352.12               | 0.0039                      | H-15 $\rightarrow$ L+1 | -0.23165    | 11%          |
|   |                      |                             | H-15 $\rightarrow$ L+2 | 0.10904     | 2%           |
|   |                      |                             | H-9 $\rightarrow$ L    | 0.54728     | 60%          |
|   |                      |                             | H-9 $\rightarrow$ L+1  | -0.20403    | 8%           |
|   |                      |                             | H-9 $\rightarrow$ L+2  | -0.17908    | 6%           |
|   |                      |                             | H-2 $\rightarrow$ L    | -0.1452     | 4%           |
| 4 | 344.16               | 0.3648                      | H-5 $\rightarrow$ L    | -0.19312    | 7%           |
|   |                      |                             | H-3 $\rightarrow$ L    | 0.18095     | 7%           |
|   |                      |                             | H-2 $\rightarrow$ L    | -0.31889    | 20%          |
|   |                      |                             | H $\rightarrow$ L+1    | 0.31442     | 20%          |
|   |                      |                             | H $\rightarrow$ L+2    | 0.36544     | 27%          |
|   |                      |                             | H $\rightarrow$ L+3    | -0.10482    | 2%           |
| 5 | 340.89               | 0.1108                      | H-5 $\rightarrow$ L    | -0.19329    | 7%           |
|   |                      |                             | H-2 $\rightarrow$ L    | 0.56569     | 64%          |
|   |                      |                             | H $\rightarrow$ L+1    | 0.16783     | 6%           |
|   |                      |                             | H $\rightarrow$ L+2    | 0.17454     | 6%           |
| 6 | 335.31               | 0.0008                      | H-15 $\rightarrow$ L   | 0.29519     | 17%          |
|   |                      |                             | H-15 $\rightarrow$ L+2 | -0.16418    | 5%           |
|   |                      |                             | H-9 $\rightarrow$ L+1  | -0.46724    | 44%          |
|   |                      |                             | H-9 $\rightarrow$ L+2  | 0.31435     | 20%          |
|   |                      |                             | H-9 $\rightarrow$ L+3  | -0.13284    | 4%           |
|   |                      |                             | H-2 $\rightarrow$ L    | 0.12911     | 3%           |
| 7 | 319.15               | 0.0366                      | H-5 $\rightarrow$ L    | -0.10978    | 2%           |

|    |        |        |             |          |     |
|----|--------|--------|-------------|----------|-----|
| 8  | 315.75 | 0.1406 | H-3 -> L    | 0.58992  | 70% |
|    |        |        | H -> L      | 0.14226  | 4%  |
|    |        |        | H -> L+1    | -0.21444 | 9%  |
|    |        |        | H-5 -> L    | 0.48189  | 46% |
|    |        |        | H-5 -> L+1  | 0.12823  | 3%  |
|    |        |        | H-4 -> L    | -0.26049 | 14% |
|    |        |        | H-3 -> L    | 0.26805  | 14% |
|    |        |        | H -> L      | -0.15962 | 5%  |
| 9  | 308.77 | 0.0001 | H -> L+1    | 0.17727  | 6%  |
|    |        |        | H-11 -> L+1 | 0.10121  | 2%  |
|    |        |        | H-8 -> L+1  | 0.17171  | 6%  |
|    |        |        | H-5 -> L+1  | -0.20246 | 8%  |
|    |        |        | H-5 -> L+2  | 0.18042  | 7%  |
|    |        |        | H -> L+1    | -0.32871 | 22% |
| 10 | 305.12 | 0.0056 | H -> L+2    | 0.40258  | 32% |
|    |        |        | H-5 -> L    | 0.29278  | 17% |
|    |        |        | H-4 -> L    | 0.6212   | 77% |

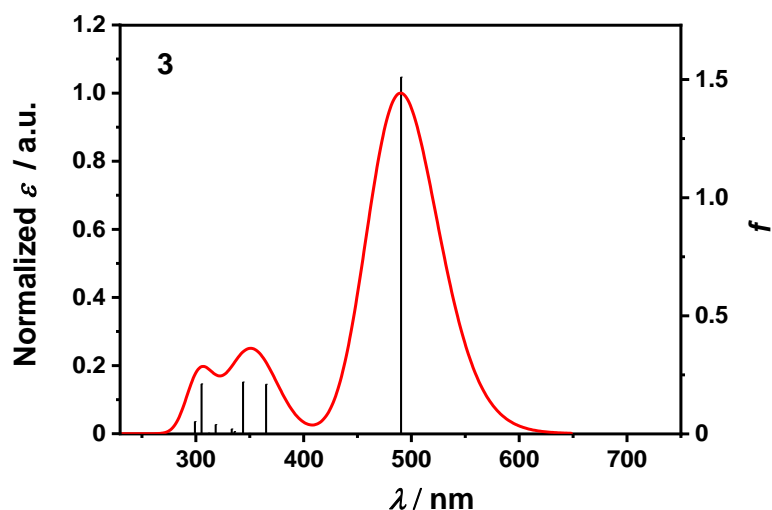

**Figure S37.** TD-DFT-calculated UV/Vis absorption spectrum of **3** at the CAM-B3LYP-D3(BJ)/def2-SVP (solvent CH<sub>2</sub>Cl<sub>2</sub>, PCM model) level of theory.

**Table S5.** TD-DFT-calculated UV/Vis absorption data for **3** at the CAM-B3LYP-D3(BJ)/def2-SVP (solvent CH<sub>2</sub>Cl<sub>2</sub>, PCM model) level (H = HOMO, L = LUMO, L+1 = LUMO+1, etc.).

|   | Calcd $\lambda$ (nm) | Oscillator strength ( $f$ ) | Composition | Coefficient | Contribution |
|---|----------------------|-----------------------------|-------------|-------------|--------------|
| 1 | 490.38               | 1.5108                      | H-5 -> L    | -0.14046    | 4%           |
|   |                      |                             | H -> L      | 0.65857     | 87%          |
|   |                      |                             | H -> L+2    | -0.15895    | 5%           |
| 2 | 365.11               | 0.2108                      | H-1 -> L    | 0.64594     | 83%          |
|   |                      |                             | H-1 -> L+2  | -0.18699    | 7%           |
|   |                      |                             | H -> L+2    | -0.11932    | 3%           |
| 3 | 349.38               | 0.0029                      | H-12 -> L+1 | 0.26208     | 14%          |
|   |                      |                             | H-7 -> L    | 0.5576      | 62%          |
|   |                      |                             | H-7 -> L+1  | -0.16435    | 5%           |
|   |                      |                             | H-7 -> L+2  | 0.20091     | 8%           |
| 4 | 343.76               | 0.2205                      | H-5 -> L    | -0.17166    | 6%           |

|    |        |        |             |          |     |
|----|--------|--------|-------------|----------|-----|
|    |        |        | H-5 -> L+1  | 0.10394  | 2%  |
|    |        |        | H-1 -> L    | 0.10053  | 2%  |
|    |        |        | H -> L      | 0.10771  | 2%  |
|    |        |        | H -> L+1    | -0.32839 | 22% |
|    |        |        | H -> L+2    | 0.52313  | 55% |
| 5  | 335.85 | 0.0104 | H-12 -> L   | 0.25686  | 13% |
|    |        |        | H-12 -> L+2 | 0.14476  | 4%  |
|    |        |        | H-7 -> L    | 0.1324   | 4%  |
|    |        |        | H-7 -> L+1  | 0.43467  | 38% |
|    |        |        | H-7 -> L+2  | 0.18285  | 7%  |
|    |        |        | H-7 -> L+3  | 0.1158   | 3%  |
|    |        |        | H-2 -> L    | 0.36248  | 26% |
| 6  | 333.31 | 0.0218 | H-12 -> L   | -0.15871 | 5%  |
|    |        |        | H-7 -> L+1  | -0.31745 | 20% |
|    |        |        | H-3 -> L    | -0.10053 | 2%  |
|    |        |        | H-2 -> L    | 0.55844  | 62% |
| 7  | 318.34 | 0.0399 | H-8 -> L+1  | -0.13369 | 4%  |
|    |        |        | H-5 -> L    | -0.10322 | 2%  |
|    |        |        | H-5 -> L+1  | -0.28033 | 16% |
|    |        |        | H -> L+1    | 0.49212  | 48% |
|    |        |        | H -> L+2    | 0.297    | 18% |
| 8  | 311.77 | 0.004  | H-6 -> L    | -0.11367 | 3%  |
|    |        |        | H-3 -> L    | 0.6553   | 86% |
|    |        |        | H-3 -> L+2  | -0.11226 | 3%  |
|    |        |        | H-2 -> L    | 0.10944  | 2%  |
|    |        |        | H -> L+2    | 0.11316  | 3%  |
| 9  | 305.25 | 0.2125 | H-6 -> L    | -0.12111 | 3%  |
|    |        |        | H-5 -> L    | 0.52958  | 56% |
|    |        |        | H-4 -> L    | 0.31319  | 20% |
|    |        |        | H -> L      | 0.16667  | 6%  |
|    |        |        | H -> L+2    | 0.16081  | 5%  |
| 10 | 299.1  | 0.0528 | H-6 -> L    | 0.58665  | 69% |
|    |        |        | H-6 -> L+2  | -0.20539 | 8%  |
|    |        |        | H-4 -> L    | 0.19647  | 8%  |
|    |        |        | H-3 -> L    | 0.11683  | 3%  |
|    |        |        | H-1 -> L    | -0.11952 | 3%  |

The gas-phase molecular volumes  $V_M$ , defined as the space occupied by the 0.001-au electron density envelope [3], was obtained by DFT calculations on gas-phase optimized geometries using B3LYP [4–6] as a functional and def2-SVP [7] as a basis set. Assuming the solute cavity to be a sphere, the Onsager cavity radii  $a$  were estimated from the following relationship:

$$a = \sqrt[3]{\frac{3V_M}{4\pi}}$$

The estimated Onsager cavity radii are presented in Table S6.

**Table S6.** Onsager cavity radii.

| Compound | <i>a</i> [Å] |
|----------|--------------|
| <b>2</b> | 6.23         |
| <b>3</b> | 5.85         |

**Cartesian coordinates of 2 (B3LYP-D3(BJ)/def2-SVP, *n*-hexane, PCM model) in S<sub>0</sub> state***E* = -2987.6218 Hartrees

| Symbol | X         | Y        | Z        |
|--------|-----------|----------|----------|
| C      | 0.73994   | -1.07703 | -0.18631 |
| N      | -1.664468 | -0.98082 | 0.069095 |
| S      | -2.337327 | 1.515586 | 0.057942 |
| O      | -4.290013 | 3.461249 | 0.119988 |
| B      | -0.498261 | -2.1302  | -0.0305  |
| C      | -5.415146 | 2.986371 | 0.131397 |
| S      | 1.502386  | 1.463178 | -0.05613 |
| O      | -7.960064 | 0.455207 | 0.148687 |
| C      | -6.693562 | 3.76143  | 0.155793 |
| C      | -6.881937 | 5.141211 | 0.169514 |
| H      | -6.023874 | 5.816257 | 0.1625   |
| C      | -8.196611 | 5.621673 | 0.192203 |
| H      | -8.379836 | 6.698621 | 0.203396 |
| C      | -9.289333 | 4.737983 | 0.200788 |
| H      | -10.30392 | 5.142747 | 0.218482 |
| C      | -9.09496  | 3.351541 | 0.186918 |
| H      | -9.935035 | 2.654157 | 0.19321  |
| C      | -7.785769 | 2.878114 | 0.164371 |
| C      | -7.286437 | 1.468174 | 0.145913 |
| C      | -5.798843 | 1.559381 | 0.124124 |
| C      | -3.008872 | -0.98975 | 0.062571 |
| H      | -3.550898 | -1.93362 | 0.048657 |
| C      | -3.606072 | 0.264283 | 0.076814 |
| C      | -5.017059 | 0.442332 | 0.100544 |
| H      | -5.580067 | -0.50008 | 0.099347 |
| C      | -1.142613 | 0.271585 | 0.026459 |
| C      | 0.263252  | 0.240372 | -0.06902 |
| C      | 2.153227  | -1.07524 | -0.22623 |
| H      | 2.775177  | -1.96862 | -0.28866 |
| C      | 2.714554  | 0.198545 | -0.18226 |
| C      | 4.116015  | 0.524741 | -0.22527 |
| H      | 4.819252  | -0.31642 | -0.28792 |
| C      | -1.034513 | -3.07556 | -1.25113 |
| C      | -0.710262 | -2.82803 | -2.61201 |
| C      | -1.225738 | -3.64325 | -3.6283  |
| H      | -0.950524 | -3.42944 | -4.6659  |
| C      | -2.090858 | -4.70873 | -3.36245 |
| C      | -2.446695 | -4.92248 | -2.03094 |

|   |           |          |          |
|---|-----------|----------|----------|
| H | -3.143342 | -5.73201 | -1.79165 |
| C | -1.942871 | -4.13362 | -0.98303 |
| C | 0.182527  | -1.68599 | -3.04315 |
| C | -2.611782 | -5.58551 | -4.47297 |
| C | -2.412641 | -4.5055  | 0.409911 |
| C | -0.112714 | -2.89488 | 1.369624 |
| C | 0.779791  | -3.99804 | 1.265259 |
| C | 1.202496  | -4.68424 | 2.411221 |
| H | 1.884506  | -5.53267 | 2.29406  |
| C | 0.784727  | -4.32129 | 3.694174 |
| C | -0.054656 | -3.2114  | 3.797364 |
| H | -0.374985 | -2.88029 | 4.790027 |
| C | -0.493809 | -2.4914  | 2.674661 |
| C | -1.364858 | -1.286   | 2.953995 |
| C | 1.299473  | -4.51783 | -0.05959 |
| C | 1.218857  | -5.10064 | 4.909668 |
| N | 4.491066  | 1.7625   | -0.18575 |
| N | 5.778511  | 2.110296 | -0.21448 |
| C | 6.814021  | 1.118825 | -0.28264 |
| C | 8.786748  | -0.84538 | -0.41576 |
| C | 7.323627  | 0.56813  | 0.897532 |
| C | 7.28087   | 0.689674 | -1.52904 |
| C | 8.271125  | -0.29341 | -1.59278 |
| C | 8.313034  | -0.41531 | 0.827866 |
| C | 6.093633  | 3.486655 | -0.17775 |
| C | 6.735838  | 6.225292 | -0.10495 |
| C | 7.437102  | 3.901602 | -0.18786 |
| C | 5.072218  | 4.453192 | -0.13064 |
| C | 5.400434  | 5.806951 | -0.09458 |
| C | 7.74649   | 5.26244  | -0.1518  |
| H | 8.238472  | 3.164298 | -0.22327 |
| H | 8.79551   | 5.568321 | -0.16012 |
| H | 6.983923  | 7.288309 | -0.07683 |
| H | 4.596522  | 6.546407 | -0.05817 |
| H | 4.03438   | 4.1262   | -0.12285 |
| H | 6.942475  | 0.917768 | 1.858846 |
| H | 8.716147  | -0.84574 | 1.74716  |
| H | 9.561255  | -1.61387 | -0.46778 |
| H | 8.641731  | -0.62854 | -2.56401 |
| H | 6.867176  | 1.133505 | -2.43653 |
| H | 0.238366  | -1.63171 | -4.14017 |
| H | 1.20862   | -1.79469 | -2.6617  |
| H | -0.180992 | -0.71408 | -2.67886 |
| H | 1.506887  | -3.72348 | -0.78627 |
| H | 0.567911  | -5.18285 | -0.54511 |
| H | -3.342452 | -5.09136 | 0.354421 |

|   |           |          |          |
|---|-----------|----------|----------|
| H | -2.594833 | -3.63976 | 1.058722 |
| H | -3.463547 | -6.19697 | -4.13945 |
| H | -1.830107 | -6.27587 | -4.83502 |
| H | -2.937491 | -4.98811 | -5.33965 |
| H | -1.664636 | -5.11566 | 0.939682 |
| H | 2.224887  | -5.09367 | 0.092041 |
| H | 0.601547  | -6.00631 | 5.044336 |
| H | 2.26479   | -5.43504 | 4.822785 |
| H | 1.125686  | -4.50182 | 5.82837  |
| H | -1.467404 | -1.13204 | 4.037514 |
| H | -2.381487 | -1.39488 | 2.546363 |
| H | -0.942885 | -0.36171 | 2.532517 |

**Cartesian coordinates of 2 (B3LYP-D3(BJ)/def2-SVP, MCH, PCM model) in S<sub>0</sub> state**

*E* = -2987.622426 Hartrees

| Symbol | X          | Y        | Z        |
|--------|------------|----------|----------|
| C      | 0.741421   | -1.07786 | -0.17454 |
| N      | -1.665175  | -0.98124 | 0.071049 |
| S      | -2.337054  | 1.513946 | 0.060019 |
| O      | -4.297841  | 3.464716 | 0.114076 |
| B      | -0.49949   | -2.1299  | -0.02423 |
| C      | -5.423169  | 2.986297 | 0.124314 |
| S      | 1.504903   | 1.460967 | -0.04848 |
| O      | -7.958759  | 0.447156 | 0.140155 |
| C      | -6.70235   | 3.757805 | 0.144727 |
| C      | -6.896071  | 5.136877 | 0.155383 |
| H      | -6.043453  | 5.818662 | 0.14889  |
| C      | -8.21304   | 5.612819 | 0.174428 |
| H      | -8.399855  | 6.688879 | 0.183134 |
| C      | -9.302616  | 4.725337 | 0.18249  |
| H      | -10.318471 | 5.126207 | 0.197324 |
| C      | -9.103025  | 3.339131 | 0.171719 |
| H      | -9.94343   | 2.642311 | 0.17772  |
| C      | -7.792077  | 2.870205 | 0.152809 |
| C      | -7.286844  | 1.464363 | 0.137797 |
| C      | -5.80107   | 1.5583   | 0.119089 |
| C      | -3.009869  | -0.99044 | 0.063761 |
| H      | -3.554755  | -1.93257 | 0.053555 |
| C      | -3.606176  | 0.264167 | 0.076591 |
| C      | -5.016619  | 0.44188  | 0.09891  |
| H      | -5.575552  | -0.50235 | 0.099341 |
| C      | -1.142152  | 0.271335 | 0.031271 |
| C      | 0.264267   | 0.239366 | -0.05885 |
| C      | 2.154933   | -1.07822 | -0.21547 |
| H      | 2.77847    | -1.97003 | -0.28349 |
| C      | 2.717696   | 0.195579 | -0.17329 |

|   |           |          |          |
|---|-----------|----------|----------|
| C | 4.118686  | 0.522376 | -0.21951 |
| H | 4.823509  | -0.31644 | -0.28678 |
| C | -1.023341 | -3.0746  | -1.2526  |
| C | -0.687801 | -2.82269 | -2.61092 |
| C | -1.188688 | -3.63975 | -3.63401 |
| H | -0.904509 | -3.4227  | -4.66854 |
| C | -2.050768 | -4.71137 | -3.37863 |
| C | -2.418567 | -4.92884 | -2.05044 |
| H | -3.113641 | -5.74198 | -1.819   |
| C | -1.928846 | -4.13815 | -0.99616 |
| C | 0.20186   | -1.67478 | -3.03355 |
| C | -2.557883 | -5.58719 | -4.49661 |
| C | -2.411261 | -4.51509 | 0.390904 |
| C | -0.123556 | -2.89739 | 1.378447 |
| C | 0.776521  | -3.99621 | 1.281139 |
| C | 1.196911  | -4.67997 | 2.429864 |
| H | 1.885717  | -5.52352 | 2.317189 |
| C | 0.768194  | -4.31972 | 3.711059 |
| C | -0.081706 | -3.21674 | 3.807853 |
| H | -0.413073 | -2.88938 | 4.798131 |
| C | -0.518235 | -2.49847 | 2.681333 |
| C | -1.404328 | -1.3029  | 2.956977 |
| C | 1.307341  | -4.51443 | -0.03993 |
| C | 1.206985  | -5.09314 | 4.929005 |
| N | 4.489517  | 1.762239 | -0.17871 |
| N | 5.775472  | 2.112822 | -0.21194 |
| C | 6.814881  | 1.124052 | -0.2891  |
| C | 8.796495  | -0.82828 | -0.43862 |
| C | 7.341819  | 0.5826   | 0.88771  |
| C | 7.267044  | 0.692692 | -1.54013 |
| C | 8.262182  | -0.2852  | -1.61185 |
| C | 8.336502  | -0.39522 | 0.809492 |
| C | 6.086298  | 3.489016 | -0.16861 |
| C | 6.723306  | 6.23084  | -0.08256 |
| C | 7.428926  | 3.908383 | -0.19312 |
| C | 5.063525  | 4.454055 | -0.1006  |
| C | 5.388684  | 5.809077 | -0.05833 |
| C | 7.735717  | 5.269905 | -0.15032 |
| H | 8.231731  | 3.173809 | -0.2454  |
| H | 8.783951  | 5.577799 | -0.17018 |
| H | 6.969436  | 7.294172 | -0.04927 |
| H | 4.583479  | 6.54619  | -0.00573 |
| H | 4.025827  | 4.126878 | -0.08201 |
| H | 6.971758  | 0.933453 | 1.852837 |
| H | 8.754123  | -0.81865 | 1.725436 |
| H | 9.57499   | -1.59215 | -0.49725 |

|   |           |          |          |
|---|-----------|----------|----------|
| H | 8.621804  | -0.62279 | -2.58622 |
| H | 6.839535  | 1.128387 | -2.44507 |
| H | 0.261691  | -1.61598 | -4.13009 |
| H | 1.226695  | -1.7817  | -2.64842 |
| H | -0.167838 | -0.70663 | -2.66574 |
| H | 1.509367  | -3.72011 | -0.76773 |
| H | 0.583326  | -5.18951 | -0.52333 |
| H | -3.340089 | -5.10093 | 0.324759 |
| H | -2.600862 | -3.65121 | 1.039501 |
| H | -3.385755 | -6.23    | -4.16234 |
| H | -1.759359 | -6.24583 | -4.87985 |
| H | -2.911808 | -4.98682 | -5.35016 |
| H | -1.666795 | -5.12821 | 0.922617 |
| H | 2.237741  | -5.08037 | 0.116743 |
| H | 0.671993  | -6.05589 | 5.004566 |
| H | 2.282622  | -5.32876 | 4.891229 |
| H | 1.010383  | -4.5332  | 5.855507 |
| H | -1.513374 | -1.15083 | 4.040096 |
| H | -2.417442 | -1.42475 | 2.544836 |
| H | -0.992947 | -0.37332 | 2.537029 |

**Cartesian coordinates of 2 (B3LYP-D3(BJ)/def2-SVP, toluene, PCM model) in S<sub>0</sub> state**

E = -2987.623726 Hartrees

| Symbol | X          | Y        | Z        |
|--------|------------|----------|----------|
| C      | 0.740218   | -1.07706 | -0.18511 |
| N      | -1.664538  | -0.98093 | 0.068945 |
| S      | -2.33729   | 1.515322 | 0.058879 |
| O      | -4.29158   | 3.461775 | 0.119503 |
| B      | -0.498383  | -2.1301  | -0.03026 |
| C      | -5.416708  | 2.986191 | 0.131118 |
| S      | 1.502713   | 1.462989 | -0.05561 |
| O      | -7.959748  | 0.453382 | 0.149629 |
| C      | -6.695323  | 3.76052  | 0.154996 |
| C      | -6.884677  | 5.140168 | 0.167856 |
| H      | -6.027553  | 5.816366 | 0.160458 |
| C      | -8.199761  | 5.619792 | 0.190189 |
| H      | -8.383648  | 6.696588 | 0.200697 |
| C      | -9.29188   | 4.735383 | 0.199272 |
| H      | -10.306716 | 5.139406 | 0.216665 |
| C      | -9.096559  | 3.34898  | 0.18626  |
| H      | -9.936695  | 2.651702 | 0.192943 |
| C      | -7.78704   | 2.876381 | 0.164061 |
| C      | -7.286544  | 1.467188 | 0.146388 |
| C      | -5.799293  | 1.558993 | 0.124588 |
| C      | -3.008944  | -0.98991 | 0.062774 |
| H      | -3.551489  | -1.93347 | 0.049321 |

|   |           |          |          |
|---|-----------|----------|----------|
| C | -3.606067 | 0.264209 | 0.077363 |
| C | -5.016927 | 0.442109 | 0.101304 |
| H | -5.579109 | -0.5007  | 0.10046  |
| C | -1.142481 | 0.271562 | 0.026957 |
| C | 0.263373  | 0.240322 | -0.06803 |
| C | 2.153489  | -1.07555 | -0.22514 |
| H | 2.775758  | -1.96867 | -0.28821 |
| C | 2.715014  | 0.198276 | -0.18141 |
| C | 4.116365  | 0.524566 | -0.22453 |
| H | 4.819912  | -0.31622 | -0.28702 |
| C | -1.03259  | -3.07517 | -1.25235 |
| C | -0.707148 | -2.8261  | -2.61279 |
| C | -1.220211 | -3.64139 | -3.63044 |
| H | -0.944114 | -3.4263  | -4.66755 |
| C | -2.084028 | -4.70854 | -3.36653 |
| C | -2.44126  | -4.9237  | -2.03551 |
| H | -3.137166 | -5.7343  | -1.79765 |
| C | -1.939885 | -4.13474 | -0.98638 |
| C | 0.184208  | -1.68231 | -3.04237 |
| C | -2.602037 | -5.58558 | -4.47826 |
| C | -2.411335 | -4.50806 | 0.405574 |
| C | -0.114313 | -2.89536 | 1.37019  |
| C | 0.779426  | -3.99775 | 1.266851 |
| C | 1.201768  | -4.68368 | 2.413192 |
| H | 1.884863  | -5.53134 | 2.296634 |
| C | 0.782303  | -4.3213  | 3.69589  |
| C | -0.058638 | -3.21241 | 3.798172 |
| H | -0.38055  | -2.88184 | 4.790509 |
| C | -0.497495 | -2.49268 | 2.674949 |
| C | -1.370764 | -1.28874 | 2.953873 |
| C | 1.300927  | -4.51709 | -0.05746 |
| C | 1.216701  | -5.10003 | 4.911743 |
| N | 4.490722  | 1.762709 | -0.18524 |
| N | 5.7779    | 2.11084  | -0.21396 |
| C | 6.81408   | 1.119644 | -0.28154 |
| C | 8.78817   | -0.84293 | -0.41334 |
| C | 7.323968  | 0.570344 | 0.899156 |
| C | 7.280993  | 0.690151 | -1.52779 |
| C | 8.272044  | -0.29223 | -1.59081 |
| C | 8.314188  | -0.41238 | 0.83008  |
| C | 6.092383  | 3.487199 | -0.17752 |
| C | 6.733886  | 6.226375 | -0.10533 |
| C | 7.435806  | 3.902665 | -0.18764 |
| C | 5.070733  | 4.453686 | -0.13075 |
| C | 5.398518  | 5.807663 | -0.09499 |
| C | 7.74484   | 5.263637 | -0.15188 |

|   |           |          |          |
|---|-----------|----------|----------|
| H | 8.237395  | 3.165612 | -0.22284 |
| H | 8.793794  | 5.569726 | -0.1602  |
| H | 6.981703  | 7.289466 | -0.07745 |
| H | 4.594377  | 6.546891 | -0.05884 |
| H | 4.032858  | 4.126787 | -0.123   |
| H | 6.942693  | 0.920173 | 1.860341 |
| H | 8.717678  | -0.8418  | 1.749658 |
| H | 9.563316  | -1.61079 | -0.46485 |
| H | 8.642841  | -0.62776 | -2.56181 |
| H | 6.866999  | 1.132794 | -2.43572 |
| H | 0.240291  | -1.62679 | -4.13931 |
| H | 1.210292  | -1.7901  | -2.66068 |
| H | -0.18085  | -0.7114  | -2.677   |
| H | 1.507601  | -3.72258 | -0.7841  |
| H | 0.570538  | -5.18348 | -0.54291 |
| H | -3.340393 | -5.09488 | 0.348286 |
| H | -2.595633 | -3.6428  | 1.05435  |
| H | -3.456104 | -6.1953  | -4.14747 |
| H | -1.820082 | -6.27767 | -4.8364  |
| H | -2.922994 | -4.98855 | -5.34694 |
| H | -1.663328 | -5.11788 | 0.935772 |
| H | 2.227072  | -5.0915  | 0.094934 |
| H | 0.606871  | -6.01157 | 5.040531 |
| H | 2.265985  | -5.42505 | 4.829581 |
| H | 1.113215  | -4.50449 | 5.831426 |
| H | -1.474257 | -1.13519 | 4.037357 |
| H | -2.386881 | -1.39946 | 2.54555  |
| H | -0.95027  | -0.36364 | 2.532767 |

**Cartesian coordinates of 2 (B3LYP-D3(BJ)/def2-SVP, CHCl<sub>3</sub>, PCM model) in S<sub>0</sub> state**

*E* = -2987.628178 Hartrees

| Symbol | X         | Y        | Z        |
|--------|-----------|----------|----------|
| C      | 0.740706  | -1.07728 | -0.18163 |
| N      | -1.664875 | -0.98127 | 0.068899 |
| S      | -2.337453 | 1.514518 | 0.06015  |
| O      | -4.295143 | 3.462785 | 0.118138 |
| B      | -0.498827 | -2.13003 | -0.02885 |
| C      | -5.420286 | 2.98567  | 0.129639 |
| S      | 1.503316  | 1.46237  | -0.0538  |
| O      | -7.959332 | 0.449399 | 0.148654 |
| C      | -6.699291 | 3.758452 | 0.152333 |
| C      | -6.890834 | 5.137803 | 0.163952 |
| H      | -6.03586  | 5.816653 | 0.156381 |
| C      | -8.206843 | 5.615559 | 0.185297 |
| H      | -8.39221  | 6.692001 | 0.194802 |
| C      | -9.297644 | 4.72957  | 0.194649 |

|   |            |          |          |
|---|------------|----------|----------|
| H | -10.313015 | 5.131972 | 0.211254 |
| C | -9.100189  | 3.343266 | 0.182885 |
| H | -9.940432  | 2.646184 | 0.18981  |
| C | -7.789947  | 2.872522 | 0.161655 |
| C | -7.286955  | 1.464984 | 0.145214 |
| C | -5.800448  | 1.558039 | 0.124042 |
| C | -3.009345  | -0.99045 | 0.062946 |
| H | -3.552948  | -1.93338 | 0.050718 |
| C | -3.606275  | 0.263845 | 0.077685 |
| C | -5.016889  | 0.441477 | 0.101594 |
| H | -5.577352  | -0.50212 | 0.101343 |
| C | -1.142436  | 0.271375 | 0.028219 |
| C | 0.263523   | 0.240025 | -0.06516 |
| C | 2.154014   | -1.07643 | -0.22194 |
| H | 2.776998   | -1.96891 | -0.28682 |
| C | 2.71596    | 0.197485 | -0.17888 |
| C | 4.117091   | 0.524053 | -0.22271 |
| H | 4.821313   | -0.31585 | -0.28564 |
| C | -1.028182  | -3.07484 | -1.254   |
| C | -0.69934   | -2.82317 | -2.61346 |
| C | -1.206796  | -3.63901 | -3.63391 |
| H | -0.928084  | -3.42182 | -4.66989 |
| C | -2.068364  | -4.70935 | -3.37414 |
| C | -2.42936   | -4.92685 | -2.04428 |
| H | -3.123994  | -5.73944 | -1.80948 |
| C | -1.933524  | -4.13734 | -0.99259 |
| C | 0.189547   | -1.67612 | -3.03974 |
| C | -2.58024   | -5.58669 | -4.48859 |
| C | -2.409132  | -4.51328 | 0.39716  |
| C | -0.118146  | -2.89609 | 1.37262  |
| C | 0.778992   | -3.9965  | 1.272009 |
| C | 1.200886   | -4.68112 | 2.419376 |
| H | 1.886874   | -5.52668 | 2.304527 |
| C | 0.777356   | -4.31968 | 3.701471 |
| C | -0.068061  | -3.21386 | 3.801251 |
| H | -0.394175  | -2.88472 | 4.792681 |
| C | -0.506535  | -2.49522 | 2.676485 |
| C | -1.386048  | -1.29539 | 2.954109 |
| C | 1.304654   | -4.51517 | -0.05091 |
| C | 1.214904   | -5.09557 | 4.91815  |
| N | 4.489827   | 1.763045 | -0.18371 |
| N | 5.776454   | 2.112082 | -0.2132  |
| C | 6.814151   | 1.121695 | -0.28125 |
| C | 8.791579   | -0.83678 | -0.41353 |
| C | 7.327445   | 0.576189 | 0.89972  |
| C | 7.27861    | 0.69092  | -1.52797 |

|   |           |          |          |
|---|-----------|----------|----------|
| C | 8.271535  | -0.28969 | -1.59113 |
| C | 8.31964   | -0.40465 | 0.830267 |
| C | 6.089379  | 3.488417 | -0.17625 |
| C | 6.729078  | 6.228863 | -0.10302 |
| C | 7.432614  | 3.905302 | -0.18879 |
| C | 5.067171  | 4.454611 | -0.1266  |
| C | 5.393877  | 5.809099 | -0.0904  |
| C | 7.740744  | 5.266574 | -0.1525  |
| H | 8.234763  | 3.169037 | -0.22641 |
| H | 8.789493  | 5.573255 | -0.16275 |
| H | 6.976212  | 7.292109 | -0.07473 |
| H | 4.589205  | 6.547655 | -0.05203 |
| H | 4.02926   | 4.127817 | -0.11712 |
| H | 6.947935  | 0.926822 | 1.861283 |
| H | 8.726154  | -0.83123 | 1.749788 |
| H | 9.568242  | -1.60306 | -0.46528 |
| H | 8.640649  | -0.6265  | -2.56228 |
| H | 6.861805  | 1.130295 | -2.43616 |
| H | 0.246628  | -1.6184  | -4.13651 |
| H | 1.215412  | -1.78231 | -2.6571  |
| H | -0.17863  | -0.70713 | -2.67253 |
| H | 1.508973  | -3.7206  | -0.778   |
| H | 0.577198  | -5.18547 | -0.53553 |
| H | -3.336789 | -5.10173 | 0.335866 |
| H | -2.597808 | -3.6489  | 1.045658 |
| H | -3.433638 | -6.19914 | -4.16122 |
| H | -1.795118 | -6.27615 | -4.84481 |
| H | -2.899292 | -4.98968 | -5.35794 |
| H | -1.661451 | -5.12274 | 0.92835  |
| H | 2.232839  | -5.08564 | 0.103272 |
| H | 0.647155  | -6.03744 | 5.016291 |
| H | 2.280517  | -5.36925 | 4.860646 |
| H | 1.0581    | -4.51961 | 5.842565 |
| H | -1.492104 | -1.14274 | 4.037462 |
| H | -2.40078  | -1.41136 | 2.544009 |
| H | -0.969847 | -0.36806 | 2.53379  |

**Cartesian coordinates of 2 (B3LYP-D3(BJ)/def2-SVP, THF, PCM model) in S<sub>0</sub> state**

E = -2987.6302 Hartrees

| Symbol | X         | Y        | Z        |
|--------|-----------|----------|----------|
| C      | 0.740948  | -1.07743 | -0.17938 |
| N      | -1.665037 | -0.98136 | 0.069156 |
| S      | -2.337462 | 1.514198 | 0.060277 |
| O      | -4.296502 | 3.463344 | 0.116945 |
| B      | -0.499067 | -2.13    | -0.02771 |
| C      | -5.421684 | 2.985634 | 0.127942 |

|   |            |          |          |
|---|------------|----------|----------|
| S | 1.503733   | 1.461955 | -0.05207 |
| O | -7.959183  | 0.448046 | 0.14575  |
| C | -6.700813  | 3.757826 | 0.149821 |
| C | -6.893272  | 5.137056 | 0.161111 |
| H | -6.039239  | 5.817076 | 0.153931 |
| C | -8.209678  | 5.614039 | 0.181636 |
| H | -8.395661  | 6.690325 | 0.190862 |
| C | -9.299948  | 4.727406 | 0.190518 |
| H | -10.315534 | 5.129149 | 0.206491 |
| C | -9.101596  | 3.341147 | 0.179092 |
| H | -9.941889  | 2.64415  | 0.18568  |
| C | -7.791053  | 2.871175 | 0.158682 |
| C | -7.287074  | 1.464333 | 0.142709 |
| C | -5.800869  | 1.557839 | 0.122405 |
| C | -3.009569  | -0.9906  | 0.062819 |
| H | -3.553635  | -1.93324 | 0.051156 |
| C | -3.606343  | 0.263787 | 0.077197 |
| C | -5.016877  | 0.441375 | 0.100609 |
| H | -5.576675  | -0.50251 | 0.100474 |
| C | -1.14241   | 0.27131  | 0.029056 |
| C | 0.263682   | 0.239825 | -0.06318 |
| C | 2.154316   | -1.07696 | -0.21974 |
| H | 2.777568   | -1.96917 | -0.28565 |
| C | 2.716502   | 0.196946 | -0.17688 |
| C | 4.117563   | 0.523633 | -0.22123 |
| H | 4.822058   | -0.31586 | -0.2851  |
| C | -1.02613   | -3.07469 | -1.25425 |
| C | -0.695019  | -2.82241 | -2.61324 |
| C | -1.199792  | -3.63859 | -3.63489 |
| H | -0.919255  | -3.42099 | -4.67029 |
| C | -2.061032  | -4.70988 | -3.37701 |
| C | -2.424365  | -4.92791 | -2.04779 |
| H | -3.118811  | -5.74106 | -1.81443 |
| C | -1.931094  | -4.13803 | -0.99495 |
| C | 0.193578   | -1.6745  | -3.03793 |
| C | -2.570644  | -5.58675 | -4.49294 |
| C | -2.409116  | -4.51481 | 0.393714 |
| C | -0.120181  | -2.89656 | 1.374237 |
| C | 0.778346   | -3.99617 | 1.274923 |
| C | 1.1998     | -4.68033 | 2.422806 |
| H | 1.887041   | -5.52499 | 2.308798 |
| C | 0.77424    | -4.31939 | 3.704562 |
| C | -0.073136  | -3.21487 | 3.803163 |
| H | -0.401312  | -2.88644 | 4.794149 |
| C | -0.511091  | -2.49653 | 2.677699 |
| C | -1.393367  | -1.29851 | 2.9546   |

|   |           |          |          |
|---|-----------|----------|----------|
| C | 1.306081  | -4.51455 | -0.04729 |
| C | 1.212686  | -5.09411 | 4.921717 |
| N | 4.48956   | 1.762981 | -0.18188 |
| N | 5.775946  | 2.11253  | -0.2122  |
| C | 6.814325  | 1.122649 | -0.28209 |
| C | 8.793359  | -0.83369 | -0.41778 |
| C | 7.331014  | 0.578778 | 0.898146 |
| C | 7.275891  | 0.691475 | -1.52975 |
| C | 8.269685  | -0.2882  | -1.59458 |
| C | 8.324158  | -0.40104 | 0.826934 |
| C | 6.088098  | 3.488835 | -0.17387 |
| C | 6.726833  | 6.229851 | -0.09787 |
| C | 7.43118   | 3.906529 | -0.18916 |
| C | 5.06563   | 4.454744 | -0.12011 |
| C | 5.391776  | 5.809457 | -0.0826  |
| C | 7.738828  | 5.267923 | -0.15146 |
| H | 8.233607  | 3.170773 | -0.23009 |
| H | 8.787438  | 5.574971 | -0.16392 |
| H | 6.973605  | 7.293152 | -0.0685  |
| H | 4.586863  | 6.547584 | -0.04105 |
| H | 4.027745  | 4.127899 | -0.10857 |
| H | 6.953703  | 0.929629 | 1.860482 |
| H | 8.733492  | -0.82637 | 1.745764 |
| H | 9.570732  | -1.59914 | -0.47091 |
| H | 8.636604  | -0.62544 | -2.56638 |
| H | 6.856389  | 1.129395 | -2.43739 |
| H | 0.251564  | -1.61605 | -4.1346  |
| H | 1.219139  | -1.78054 | -2.65446 |
| H | -0.175594 | -0.70609 | -2.67021 |
| H | 1.509363  | -3.72001 | -0.77462 |
| H | 0.580061  | -5.18676 | -0.53149 |
| H | -3.336715 | -5.10306 | 0.330457 |
| H | -2.598965 | -3.65076 | 1.042203 |
| H | -3.416288 | -6.20889 | -4.16385 |
| H | -1.78087  | -6.26657 | -4.85717 |
| H | -2.900097 | -4.98853 | -5.35761 |
| H | -1.662215 | -5.12499 | 0.925247 |
| H | 2.235217  | -5.08313 | 0.107834 |
| H | 0.660213  | -6.04599 | 5.009335 |
| H | 2.283253  | -5.34981 | 4.873224 |
| H | 1.037316  | -4.5255  | 5.847281 |
| H | -1.500704 | -1.14623 | 4.037872 |
| H | -2.407419 | -1.41683 | 2.543588 |
| H | -0.979068 | -0.37021 | 2.534611 |

**Cartesian coordinates of 2 (B3LYP-D3(BJ)/def2-SVP, CH<sub>2</sub>Cl<sub>2</sub>, PCM model) in S<sub>0</sub> state***E* = -2987.630842 Hartrees

| Symbol | X          | Y        | Z        |
|--------|------------|----------|----------|
| C      | 0.741013   | -1.0775  | -0.17861 |
| N      | -1.665073  | -0.98136 | 0.069546 |
| S      | -2.337432  | 1.514118 | 0.060464 |
| O      | -4.296855  | 3.463559 | 0.116814 |
| B      | -0.499149  | -2.12998 | -0.02711 |
| C      | -5.422056  | 2.985681 | 0.127788 |
| S      | 1.503896   | 1.461803 | -0.05163 |
| O      | -7.959112  | 0.447724 | 0.145549 |
| C      | -6.701209  | 3.757709 | 0.149509 |
| C      | -6.89394   | 5.136904 | 0.160669 |
| H      | -6.040198  | 5.817285 | 0.153509 |
| C      | -8.210463  | 5.613659 | 0.181048 |
| H      | -8.396627  | 6.689898 | 0.19017  |
| C      | -9.300577  | 4.726838 | 0.189916 |
| H      | -10.316223 | 5.128388 | 0.205775 |
| C      | -9.101959  | 3.340591 | 0.178623 |
| H      | -9.942268  | 2.643623 | 0.185208 |
| C      | -7.791329  | 2.870847 | 0.158362 |
| C      | -7.287067  | 1.464215 | 0.142539 |
| C      | -5.800955  | 1.557838 | 0.122368 |
| C      | -3.009631  | -0.99062 | 0.063191 |
| H      | -3.553848  | -1.93316 | 0.051831 |
| C      | -3.606339  | 0.263806 | 0.077402 |
| C      | -5.016848  | 0.441396 | 0.100774 |
| H      | -5.576454  | -0.50257 | 0.100793 |
| C      | -1.142386  | 0.271303 | 0.029497 |
| C      | 0.26375    | 0.239753 | -0.06248 |
| C      | 2.1544     | -1.07716 | -0.21916 |
| H      | 2.77772    | -1.96929 | -0.28548 |
| C      | 2.71668    | 0.196738 | -0.17648 |
| C      | 4.117718   | 0.523455 | -0.22123 |
| H      | 4.822282   | -0.31591 | -0.28561 |
| C      | -1.025637  | -3.07468 | -1.25399 |
| C      | -0.693876  | -2.82234 | -2.61287 |
| C      | -1.197927  | -3.63868 | -3.6348  |
| H      | -0.916857  | -3.42106 | -4.67006 |
| C      | -2.059141  | -4.71017 | -3.37737 |
| C      | -2.423148  | -4.92823 | -2.04832 |
| H      | -3.117587  | -5.74148 | -1.8153  |
| C      | -1.930547  | -4.1382  | -0.99521 |
| C      | 0.194701   | -1.67427 | -3.03721 |
| C      | -2.56821   | -5.58692 | -4.49366 |
| C      | -2.409244  | -4.51512 | 0.393177 |

|   |           |          |          |
|---|-----------|----------|----------|
| C | -0.120703 | -2.89668 | 1.374963 |
| C | 0.778197  | -3.99607 | 1.275994 |
| C | 1.19959   | -4.6801  | 2.424019 |
| H | 1.887183  | -5.5245  | 2.31023  |
| C | 0.773514  | -4.31928 | 3.705696 |
| C | -0.074419 | -3.21512 | 3.803988 |
| H | -0.403141 | -2.88688 | 4.794857 |
| C | -0.512264 | -2.49687 | 2.678334 |
| C | -1.395329 | -1.29937 | 2.955055 |
| C | 1.30645   | -4.51442 | -0.04603 |
| C | 1.212236  | -5.09367 | 4.922985 |
| N | 4.48949   | 1.76291  | -0.18176 |
| N | 5.775796  | 2.112634 | -0.21261 |
| C | 6.814375  | 1.12293  | -0.28351 |
| C | 8.793899  | -0.8327  | -0.42109 |
| C | 7.332634  | 0.579586 | 0.896283 |
| C | 7.274527  | 0.691633 | -1.53164 |
| C | 8.268582  | -0.28773 | -1.59741 |
| C | 8.326069  | -0.39988 | 0.82411  |
| C | 6.087704  | 3.488925 | -0.1737  |
| C | 6.726133  | 6.230115 | -0.09652 |
| C | 7.430723  | 3.906898 | -0.19036 |
| C | 5.065167  | 4.454719 | -0.118   |
| C | 5.391135  | 5.809499 | -0.07993 |
| C | 7.738219  | 5.268326 | -0.15206 |
| H | 8.23323   | 3.171327 | -0.23285 |
| H | 8.786774  | 5.575505 | -0.16561 |
| H | 6.972791  | 7.293429 | -0.06669 |
| H | 4.586158  | 6.547471 | -0.03687 |
| H | 4.0273    | 4.127843 | -0.10542 |
| H | 6.956408  | 0.930503 | 1.859017 |
| H | 8.736682  | -0.8248  | 1.742552 |
| H | 9.571488  | -1.59787 | -0.47496 |
| H | 8.634411  | -0.62511 | -2.56957 |
| H | 6.853791  | 1.129081 | -2.43893 |
| H | 0.252898  | -1.61568 | -4.13386 |
| H | 1.220185  | -1.78034 | -2.65355 |
| H | -0.174673 | -0.70599 | -2.66938 |
| H | 1.509356  | -3.71991 | -0.77348 |
| H | 0.580824  | -5.18724 | -0.53    |
| H | -3.336937 | -5.10314 | 0.329417 |
| H | -2.599231 | -3.65113 | 1.041675 |
| H | -3.411178 | -6.21227 | -4.16384 |
| H | -1.776981 | -6.2635  | -4.8607  |
| H | -2.901309 | -4.98835 | -5.35671 |
| H | -1.662633 | -5.12566 | 0.924727 |

|   |           |          |          |
|---|-----------|----------|----------|
| H | 2.235889  | -5.08241 | 0.10932  |
| H | 0.66365   | -6.048   | 5.008028 |
| H | 2.283978  | -5.34487 | 4.876723 |
| H | 1.032258  | -4.52692 | 5.848791 |
| H | -1.502937 | -1.14714 | 4.038305 |
| H | -2.409218 | -1.41841 | 2.543883 |
| H | -0.981656 | -0.3708  | 2.535066 |

**Cartesian coordinates of 2 (B3LYP-D3(BJ)/def2-SVP, acetone, PCM model) in  $S_0$  state**  
 $E = -2987.628178$  Hartrees

| Symbol | X          | Y        | Z        |
|--------|------------|----------|----------|
| C      | 0.740706   | -1.07728 | -0.18163 |
| N      | -1.664875  | -0.98127 | 0.068899 |
| S      | -2.337453  | 1.514518 | 0.06015  |
| O      | -4.295143  | 3.462785 | 0.118138 |
| B      | -0.498827  | -2.13003 | -0.02885 |
| C      | -5.420286  | 2.98567  | 0.129639 |
| S      | 1.503316   | 1.46237  | -0.0538  |
| O      | -7.959332  | 0.449399 | 0.148654 |
| C      | -6.699291  | 3.758452 | 0.152333 |
| C      | -6.890834  | 5.137803 | 0.163952 |
| H      | -6.03586   | 5.816653 | 0.156381 |
| C      | -8.206843  | 5.615559 | 0.185297 |
| H      | -8.39221   | 6.692001 | 0.194802 |
| C      | -9.297644  | 4.72957  | 0.194649 |
| H      | -10.313015 | 5.131972 | 0.211254 |
| C      | -9.100189  | 3.343266 | 0.182885 |
| H      | -9.940432  | 2.646184 | 0.18981  |
| C      | -7.789947  | 2.872522 | 0.161655 |
| C      | -7.286955  | 1.464984 | 0.145214 |
| C      | -5.800448  | 1.558039 | 0.124042 |
| C      | -3.009345  | -0.99045 | 0.062946 |
| H      | -3.552948  | -1.93338 | 0.050718 |
| C      | -3.606275  | 0.263845 | 0.077685 |
| C      | -5.016889  | 0.441477 | 0.101594 |
| H      | -5.577352  | -0.50212 | 0.101343 |
| C      | -1.142436  | 0.271375 | 0.028219 |
| C      | 0.263523   | 0.240025 | -0.06516 |
| C      | 2.154014   | -1.07643 | -0.22194 |
| H      | 2.776998   | -1.96891 | -0.28682 |
| C      | 2.71596    | 0.197485 | -0.17888 |
| C      | 4.117091   | 0.524053 | -0.22271 |
| H      | 4.821313   | -0.31585 | -0.28564 |
| C      | -1.028182  | -3.07484 | -1.254   |
| C      | -0.69934   | -2.82317 | -2.61346 |
| C      | -1.206796  | -3.63901 | -3.63391 |

|   |           |          |          |
|---|-----------|----------|----------|
| H | -0.928084 | -3.42182 | -4.66989 |
| C | -2.068364 | -4.70935 | -3.37414 |
| C | -2.42936  | -4.92685 | -2.04428 |
| H | -3.123994 | -5.73944 | -1.80948 |
| C | -1.933524 | -4.13734 | -0.99259 |
| C | 0.189547  | -1.67612 | -3.03974 |
| C | -2.58024  | -5.58669 | -4.48859 |
| C | -2.409132 | -4.51328 | 0.39716  |
| C | -0.118146 | -2.89609 | 1.37262  |
| C | 0.778992  | -3.9965  | 1.272009 |
| C | 1.200886  | -4.68112 | 2.419376 |
| H | 1.886874  | -5.52668 | 2.304527 |
| C | 0.777356  | -4.31968 | 3.701471 |
| C | -0.068061 | -3.21386 | 3.801251 |
| H | -0.394175 | -2.88472 | 4.792681 |
| C | -0.506535 | -2.49522 | 2.676485 |
| C | -1.386048 | -1.29539 | 2.954109 |
| C | 1.304654  | -4.51517 | -0.05091 |
| C | 1.214904  | -5.09557 | 4.91815  |
| N | 4.489827  | 1.763045 | -0.18371 |
| N | 5.776454  | 2.112082 | -0.2132  |
| C | 6.814151  | 1.121695 | -0.28125 |
| C | 8.791579  | -0.83678 | -0.41353 |
| C | 7.327445  | 0.576189 | 0.89972  |
| C | 7.27861   | 0.69092  | -1.52797 |
| C | 8.271535  | -0.28969 | -1.59113 |
| C | 8.31964   | -0.40465 | 0.830267 |
| C | 6.089379  | 3.488417 | -0.17625 |
| C | 6.729078  | 6.228863 | -0.10302 |
| C | 7.432614  | 3.905302 | -0.18879 |
| C | 5.067171  | 4.454611 | -0.1266  |
| C | 5.393877  | 5.809099 | -0.0904  |
| C | 7.740744  | 5.266574 | -0.1525  |
| H | 8.234763  | 3.169037 | -0.22641 |
| H | 8.789493  | 5.573255 | -0.16275 |
| H | 6.976212  | 7.292109 | -0.07473 |
| H | 4.589205  | 6.547655 | -0.05203 |
| H | 4.02926   | 4.127817 | -0.11712 |
| H | 6.947935  | 0.926822 | 1.861283 |
| H | 8.726154  | -0.83123 | 1.749788 |
| H | 9.568242  | -1.60306 | -0.46528 |
| H | 8.640649  | -0.6265  | -2.56228 |
| H | 6.861805  | 1.130295 | -2.43616 |
| H | 0.246628  | -1.6184  | -4.13651 |
| H | 1.215412  | -1.78231 | -2.6571  |
| H | -0.17863  | -0.70713 | -2.67253 |

|   |           |          |          |
|---|-----------|----------|----------|
| H | 1.508973  | -3.7206  | -0.778   |
| H | 0.577198  | -5.18547 | -0.53553 |
| H | -3.336789 | -5.10173 | 0.335866 |
| H | -2.597808 | -3.6489  | 1.045658 |
| H | -3.433638 | -6.19914 | -4.16122 |
| H | -1.795118 | -6.27615 | -4.84481 |
| H | -2.899292 | -4.98968 | -5.35794 |
| H | -1.661451 | -5.12274 | 0.92835  |
| H | 2.232839  | -5.08564 | 0.103272 |
| H | 0.647155  | -6.03744 | 5.016291 |
| H | 2.280517  | -5.36925 | 4.860646 |
| H | 1.0581    | -4.51961 | 5.842565 |
| H | -1.492104 | -1.14274 | 4.037462 |
| H | -2.40078  | -1.41136 | 2.544009 |
| H | -0.969847 | -0.36806 | 2.53379  |

**Cartesian coordinates of 2 (B3LYP-D3(BJ)/def2-SVP, EtOH, PCM model) in  $S_0$  state**

$E = -2987.633056$  Hartrees

| Symbol | X          | Y        | Z        |
|--------|------------|----------|----------|
| C      | 0.741348   | -1.07779 | -0.17526 |
| N      | -1.665168  | -0.98128 | 0.070738 |
| S      | -2.337145  | 1.513952 | 0.060175 |
| O      | -4.297748  | 3.464499 | 0.114675 |
| B      | -0.499436  | -2.12992 | -0.02479 |
| C      | -5.42305   | 2.986146 | 0.125023 |
| S      | 1.504708   | 1.46112  | -0.04902 |
| O      | -7.958829  | 0.447152 | 0.141146 |
| C      | -6.702236  | 3.757717 | 0.145668 |
| C      | -6.895818  | 5.136805 | 0.156429 |
| H      | -6.043033  | 5.818381 | 0.149833 |
| C      | -8.212723  | 5.612859 | 0.175706 |
| H      | -8.399448  | 6.688945 | 0.184496 |
| C      | -9.302372  | 4.725467 | 0.183892 |
| H      | -10.318199 | 5.12643  | 0.198904 |
| C      | -9.102918  | 3.339256 | 0.173013 |
| H      | -9.943305  | 2.64241  | 0.179103 |
| C      | -7.792014  | 2.870218 | 0.153868 |
| C      | -7.286909  | 1.464261 | 0.138694 |
| C      | -5.801087  | 1.558169 | 0.119736 |
| C      | -3.009837  | -0.9905  | 0.063633 |
| H      | -3.554612  | -1.9327  | 0.053208 |
| C      | -3.606223  | 0.264074 | 0.076762 |
| C      | -5.016673  | 0.441754 | 0.09928  |
| H      | -5.575698  | -0.50244 | 0.099616 |
| C      | -1.142206  | 0.27132  | 0.030964 |
| C      | 0.264161   | 0.239437 | -0.05948 |

|   |           |          |          |
|---|-----------|----------|----------|
| C | 2.154838  | -1.07802 | -0.21611 |
| H | 2.778349  | -1.96988 | -0.28385 |
| C | 2.717512  | 0.195796 | -0.17383 |
| C | 4.118506  | 0.522588 | -0.21977 |
| H | 4.823296  | -0.31631 | -0.28647 |
| C | -1.023673 | -3.0746  | -1.25295 |
| C | -0.688784 | -2.82252 | -2.61136 |
| C | -1.190131 | -3.63944 | -3.6343  |
| H | -0.90649  | -3.42221 | -4.66894 |
| C | -2.051976 | -4.71113 | -3.37863 |
| C | -2.419125 | -4.9288  | -2.05031 |
| H | -3.114027 | -5.74203 | -1.81865 |
| C | -1.928996 | -4.13823 | -0.99618 |
| C | 0.200596  | -1.67448 | -3.03422 |
| C | -2.559335 | -5.58709 | -4.49638 |
| C | -2.410786 | -4.51526 | 0.391075 |
| C | -0.12309  | -2.89728 | 1.377792 |
| C | 0.776849  | -3.99615 | 1.280216 |
| C | 1.197434  | -4.67994 | 2.428826 |
| H | 1.886085  | -5.52359 | 2.315967 |
| C | 0.769134  | -4.31961 | 3.710101 |
| C | -0.080498 | -3.21648 | 3.807138 |
| H | -0.411444 | -2.88899 | 4.797513 |
| C | -0.517285 | -2.49824 | 2.680758 |
| C | -1.402934 | -1.3024  | 2.956591 |
| C | 1.30728   | -4.51437 | -0.04101 |
| C | 1.207959  | -5.09317 | 4.92794  |
| N | 4.489482  | 1.762392 | -0.17926 |
| N | 5.775495  | 2.112826 | -0.21203 |
| C | 6.814781  | 1.123889 | -0.28789 |
| C | 8.796076  | -0.829   | -0.43494 |
| C | 7.340014  | 0.582153 | 0.889546 |
| C | 7.268543  | 0.692508 | -1.53834 |
| C | 8.263518  | -0.28563 | -1.60883 |
| C | 8.334503  | -0.39595 | 0.812577 |
| C | 6.086492  | 3.489043 | -0.16964 |
| C | 6.723724  | 6.230784 | -0.08547 |
| C | 7.429199  | 3.908165 | -0.19255 |
| C | 5.063739  | 4.454235 | -0.10418 |
| C | 5.389025  | 5.809226 | -0.0628  |
| C | 7.736101  | 5.269681 | -0.1507  |
| H | 8.23197   | 3.173406 | -0.24281 |
| H | 8.784399  | 5.577443 | -0.16928 |
| H | 6.969937  | 7.29412  | -0.05292 |
| H | 4.583843  | 6.546502 | -0.01218 |
| H | 4.026001  | 4.127124 | -0.08683 |

|   |           |          |          |
|---|-----------|----------|----------|
| H | 6.968716  | 0.93304  | 1.854189 |
| H | 8.750756  | -0.81961 | 1.729042 |
| H | 9.574433  | -1.59309 | -0.49259 |
| H | 8.624387  | -0.62321 | -2.58274 |
| H | 6.842359  | 1.12847  | -2.44378 |
| H | 0.260133  | -1.61564 | -4.13077 |
| H | 1.225554  | -1.7812  | -2.64935 |
| H | -0.169122 | -0.70636 | -2.66634 |
| H | 1.509388  | -3.72    | -0.76875 |
| H | 0.583042  | -5.18912 | -0.5245  |
| H | -3.339348 | -5.10158 | 0.325285 |
| H | -2.600588 | -3.65139 | 1.039659 |
| H | -3.389644 | -6.22715 | -4.16285 |
| H | -1.761912 | -6.2486  | -4.87701 |
| H | -2.909906 | -4.98697 | -5.35148 |
| H | -1.6659   | -5.12786 | 0.922773 |
| H | 2.237562  | -5.08058 | 0.115444 |
| H | 0.670795  | -6.0546  | 5.00504  |
| H | 2.282996  | -5.33126 | 4.888777 |
| H | 1.014021  | -4.53212 | 5.854341 |
| H | -1.511767 | -1.15033 | 4.039733 |
| H | -2.416163 | -1.42381 | 2.544588 |
| H | -0.9912   | -0.37296 | 2.536669 |

**Cartesian coordinates of 2 (B3LYP-D3(BJ)/def2-SVP, MeCN, PCM model) in S<sub>0</sub> state**

*E* = -2987.633465 Hartrees

| Symbol | X          | Y        | Z        |
|--------|------------|----------|----------|
| C      | 0.741421   | -1.07786 | -0.17454 |
| N      | -1.665175  | -0.98124 | 0.071049 |
| S      | -2.337054  | 1.513946 | 0.060019 |
| O      | -4.297841  | 3.464716 | 0.114076 |
| B      | -0.49949   | -2.1299  | -0.02423 |
| C      | -5.423169  | 2.986297 | 0.124314 |
| S      | 1.504903   | 1.460967 | -0.04848 |
| O      | -7.958759  | 0.447156 | 0.140155 |
| C      | -6.70235   | 3.757805 | 0.144727 |
| C      | -6.896071  | 5.136877 | 0.155383 |
| H      | -6.043453  | 5.818662 | 0.14889  |
| C      | -8.21304   | 5.612819 | 0.174428 |
| H      | -8.399855  | 6.688879 | 0.183134 |
| C      | -9.302616  | 4.725337 | 0.18249  |
| H      | -10.318471 | 5.126207 | 0.197324 |
| C      | -9.103025  | 3.339131 | 0.171719 |
| H      | -9.94343   | 2.642311 | 0.17772  |
| C      | -7.792077  | 2.870205 | 0.152809 |
| C      | -7.286844  | 1.464363 | 0.137797 |

|   |           |          |          |
|---|-----------|----------|----------|
| C | -5.80107  | 1.5583   | 0.119089 |
| C | -3.009869 | -0.99044 | 0.063761 |
| H | -3.554755 | -1.93257 | 0.053555 |
| C | -3.606176 | 0.264167 | 0.076591 |
| C | -5.016619 | 0.44188  | 0.09891  |
| H | -5.575552 | -0.50235 | 0.099341 |
| C | -1.142152 | 0.271335 | 0.031271 |
| C | 0.264267  | 0.239366 | -0.05885 |
| C | 2.154933  | -1.07822 | -0.21547 |
| H | 2.77847   | -1.97003 | -0.28349 |
| C | 2.717696  | 0.195579 | -0.17329 |
| C | 4.118686  | 0.522376 | -0.21951 |
| H | 4.823509  | -0.31644 | -0.28678 |
| C | -1.023341 | -3.0746  | -1.2526  |
| C | -0.687801 | -2.82269 | -2.61092 |
| C | -1.188688 | -3.63975 | -3.63401 |
| H | -0.904509 | -3.4227  | -4.66854 |
| C | -2.050768 | -4.71137 | -3.37863 |
| C | -2.418567 | -4.92884 | -2.05044 |
| H | -3.113641 | -5.74198 | -1.819   |
| C | -1.928846 | -4.13815 | -0.99616 |
| C | 0.20186   | -1.67478 | -3.03355 |
| C | -2.557883 | -5.58719 | -4.49661 |
| C | -2.411261 | -4.51509 | 0.390904 |
| C | -0.123556 | -2.89739 | 1.378447 |
| C | 0.776521  | -3.99621 | 1.281139 |
| C | 1.196911  | -4.67997 | 2.429864 |
| H | 1.885717  | -5.52352 | 2.317189 |
| C | 0.768194  | -4.31972 | 3.711059 |
| C | -0.081706 | -3.21674 | 3.807853 |
| H | -0.413073 | -2.88938 | 4.798131 |
| C | -0.518235 | -2.49847 | 2.681333 |
| C | -1.404328 | -1.3029  | 2.956977 |
| C | 1.307341  | -4.51443 | -0.03993 |
| C | 1.206985  | -5.09314 | 4.929005 |
| N | 4.489517  | 1.762239 | -0.17871 |
| N | 5.775472  | 2.112822 | -0.21194 |
| C | 6.814881  | 1.124052 | -0.2891  |
| C | 8.796495  | -0.82828 | -0.43862 |
| C | 7.341819  | 0.5826   | 0.88771  |
| C | 7.267044  | 0.692692 | -1.54013 |
| C | 8.262182  | -0.2852  | -1.61185 |
| C | 8.336502  | -0.39522 | 0.809492 |
| C | 6.086298  | 3.489016 | -0.16861 |
| C | 6.723306  | 6.23084  | -0.08256 |
| C | 7.428926  | 3.908383 | -0.19312 |

|   |           |          |          |
|---|-----------|----------|----------|
| C | 5.063525  | 4.454055 | -0.1006  |
| C | 5.388684  | 5.809077 | -0.05833 |
| C | 7.735717  | 5.269905 | -0.15032 |
| H | 8.231731  | 3.173809 | -0.2454  |
| H | 8.783951  | 5.577799 | -0.17018 |
| H | 6.969436  | 7.294172 | -0.04927 |
| H | 4.583479  | 6.54619  | -0.00573 |
| H | 4.025827  | 4.126878 | -0.08201 |
| H | 6.971758  | 0.933453 | 1.852837 |
| H | 8.754123  | -0.81865 | 1.725436 |
| H | 9.57499   | -1.59215 | -0.49725 |
| H | 8.621804  | -0.62279 | -2.58622 |
| H | 6.839535  | 1.128387 | -2.44507 |
| H | 0.261691  | -1.61598 | -4.13009 |
| H | 1.226695  | -1.7817  | -2.64842 |
| H | -0.167838 | -0.70663 | -2.66574 |
| H | 1.509367  | -3.72011 | -0.76773 |
| H | 0.583326  | -5.18951 | -0.52333 |
| H | -3.340089 | -5.10093 | 0.324759 |
| H | -2.600862 | -3.65121 | 1.039501 |
| H | -3.385755 | -6.23    | -4.16234 |
| H | -1.759359 | -6.24583 | -4.87985 |
| H | -2.911808 | -4.98682 | -5.35016 |
| H | -1.666795 | -5.12821 | 0.922617 |
| H | 2.237741  | -5.08037 | 0.116743 |
| H | 0.671993  | -6.05589 | 5.004566 |
| H | 2.282622  | -5.32876 | 4.891229 |
| H | 1.010383  | -4.5332  | 5.855507 |
| H | -1.513374 | -1.15083 | 4.040096 |
| H | -2.417442 | -1.42475 | 2.544836 |
| H | -0.992947 | -0.37332 | 2.537029 |

**Cartesian coordinates of 3 (B3LYP-D3(BJ)/def2-SVP, *n*-hexane, PCM model) in S<sub>0</sub> state**

*E* = -2604.367453 Hartrees

| Symbol | X        | Y        | Z        |
|--------|----------|----------|----------|
| C      | 2.177937 | 0.329197 | -0.28587 |
| N      | -0.04467 | -0.56881 | 0.051604 |
| S      | -1.69273 | 1.424749 | -0.00661 |
| O      | -4.27837 | 2.387365 | 0.075838 |
| B      | 1.490311 | -1.13438 | -0.05201 |
| C      | -5.10277 | 1.488105 | 0.138042 |
| S      | 1.819404 | 2.961261 | -0.26644 |
| O      | -6.36472 | -1.86741 | 0.307712 |
| C      | -6.58752 | 1.663905 | 0.186577 |
| C      | -7.3326  | 2.840276 | 0.171538 |
| H      | -6.83376 | 3.810012 | 0.117783 |

|   |          |          |          |
|---|----------|----------|----------|
| C | -8.7274  | 2.732139 | 0.227231 |
| H | -9.3418  | 3.635463 | 0.217173 |
| C | -9.35289 | 1.475727 | 0.296207 |
| H | -10.4433 | 1.423006 | 0.338619 |
| C | -8.59923 | 0.295737 | 0.311178 |
| H | -9.07209 | -0.68689 | 0.364602 |
| C | -7.21272 | 0.408154 | 0.255448 |
| C | -6.17189 | -0.66696 | 0.255776 |
| C | -4.85899 | 0.032175 | 0.180503 |
| C | -1.26308 | -1.13235 | 0.092517 |
| H | -1.36525 | -2.21566 | 0.124766 |
| C | -2.32779 | -0.23903 | 0.092046 |
| C | -3.68282 | -0.66029 | 0.159326 |
| H | -3.8036  | -1.75058 | 0.202059 |
| C | -0.089   | 0.786682 | -0.04632 |
| C | 1.197685 | 1.334924 | -0.19202 |
| C | 3.460107 | 0.913543 | -0.38127 |
| H | 4.394704 | 0.355272 | -0.44069 |
| C | 3.44513  | 2.30758  | -0.40015 |
| C | 4.57926  | 3.185113 | -0.5141  |
| H | 5.564469 | 2.705411 | -0.57515 |
| C | 1.374882 | -2.27122 | -1.22124 |
| C | 1.537935 | -1.97115 | -2.60032 |
| C | 1.394766 | -2.97167 | -3.5707  |
| H | 1.534251 | -2.70813 | -4.62393 |
| C | 1.063884 | -4.289   | -3.23985 |
| C | 0.855329 | -4.57272 | -1.89034 |
| H | 0.567813 | -5.58817 | -1.60028 |
| C | 0.999936 | -3.59953 | -0.88716 |
| C | 1.85592  | -0.57952 | -3.09966 |
| H | 2.840813 | -0.23033 | -2.75612 |
| H | 1.125583 | 0.164081 | -2.7488  |
| H | 1.856952 | -0.55403 | -4.19921 |
| C | 0.939163 | -5.35165 | -4.30225 |
| H | 1.931194 | -5.65969 | -4.67599 |
| H | 0.368561 | -4.98773 | -5.17186 |
| H | 0.437431 | -6.25176 | -3.9166  |
| C | 0.753186 | -4.07112 | 0.53263  |
| H | 0.159406 | -4.99756 | 0.528293 |
| H | 0.229419 | -3.33515 | 1.155325 |
| H | 1.696875 | -4.28117 | 1.059396 |
| C | 2.18347  | -1.60924 | 1.358248 |
| C | 3.453219 | -2.24418 | 1.259316 |
| C | 4.142519 | -2.64449 | 2.411147 |
| H | 5.114227 | -3.13625 | 2.297905 |
| C | 3.632543 | -2.4362  | 3.695413 |

|   |          |          |          |
|---|----------|----------|----------|
| C | 2.408251 | -1.77424 | 3.791458 |
| H | 1.994769 | -1.56724 | 4.783345 |
| C | 1.690056 | -1.34912 | 2.661818 |
| C | 0.398079 | -0.60934 | 2.932781 |
| H | -0.48551 | -1.1531  | 2.564974 |
| H | 0.383416 | 0.386844 | 2.466824 |
| H | 0.260319 | -0.46527 | 4.013804 |
| C | 4.119955 | -2.55564 | -0.06517 |
| H | 5.204157 | -2.68392 | 0.073372 |
| H | 3.961747 | -1.78002 | -0.8236  |
| H | 3.72694  | -3.48652 | -0.50354 |
| C | 4.374603 | -2.91169 | 4.918798 |
| H | 4.016016 | -2.40906 | 5.829744 |
| H | 5.457563 | -2.72913 | 4.83066  |
| H | 4.243323 | -3.9978  | 5.068482 |
| N | 4.398597 | 4.473294 | -0.53287 |
| N | 5.400566 | 5.323308 | -0.59938 |
| C | 6.773182 | 4.890518 | -0.7521  |
| H | 7.428196 | 5.770143 | -0.75901 |
| H | 6.921292 | 4.329055 | -1.69443 |
| H | 7.073813 | 4.236455 | 0.084155 |
| C | 5.057394 | 6.716865 | -0.80408 |
| H | 5.199915 | 7.025879 | -1.85674 |
| H | 5.677049 | 7.365416 | -0.16462 |
| H | 4.001759 | 6.847807 | -0.53818 |

**Cartesian coordinates of 3 (B3LYP-D3(BJ)/def2-SVP, MCH, PCM model) in  $S_0$  state**  
 $E = -2604.368087$  Hartrees

| Symbol | X        | Y        | Z        |
|--------|----------|----------|----------|
| C      | 2.178053 | 0.329467 | -0.28532 |
| N      | -0.0447  | -0.56873 | 0.051447 |
| S      | -1.69277 | 1.424846 | -0.00653 |
| O      | -4.27906 | 2.387298 | 0.075762 |
| B      | 1.490249 | -1.13415 | -0.0518  |
| C      | -5.10332 | 1.487761 | 0.137784 |
| S      | 1.819395 | 2.961517 | -0.26664 |
| O      | -6.36439 | -1.86803 | 0.306976 |
| C      | -6.58807 | 1.663279 | 0.18616  |
| C      | -7.33348 | 2.839431 | 0.171145 |
| H      | -6.83515 | 3.80943  | 0.117531 |
| C      | -8.72829 | 2.730901 | 0.226682 |
| H      | -9.34291 | 3.634056 | 0.216634 |
| C      | -9.35344 | 1.474321 | 0.295487 |
| H      | -10.4438 | 1.421274 | 0.337782 |
| C      | -8.59943 | 0.294516 | 0.310434 |
| H      | -9.07225 | -0.68813 | 0.363733 |

|   |          |          |          |
|---|----------|----------|----------|
| C | -7.21294 | 0.407316 | 0.254857 |
| C | -6.17179 | -0.66736 | 0.255178 |
| C | -4.85914 | 0.031957 | 0.180119 |
| C | -1.26303 | -1.13227 | 0.09231  |
| H | -1.36539 | -2.21556 | 0.124662 |
| C | -2.32783 | -0.23897 | 0.091849 |
| C | -3.68272 | -0.66032 | 0.158972 |
| H | -3.80314 | -1.75063 | 0.201563 |
| C | -0.08896 | 0.786916 | -0.04627 |
| C | 1.197602 | 1.335152 | -0.19172 |
| C | 3.46015  | 0.913705 | -0.38085 |
| H | 4.39482  | 0.355582 | -0.44042 |
| C | 3.445289 | 2.307883 | -0.40011 |
| C | 4.57923  | 3.185304 | -0.51429 |
| H | 5.564541 | 2.70596  | -0.57542 |
| C | 1.375687 | -2.2707  | -1.22154 |
| C | 1.538976 | -1.96999 | -2.6005  |
| C | 1.397091 | -2.97029 | -3.57134 |
| H | 1.536745 | -2.70623 | -4.62442 |
| C | 1.067249 | -4.28809 | -3.24114 |
| C | 0.858258 | -4.57243 | -1.8918  |
| H | 0.571367 | -5.58821 | -1.60222 |
| C | 1.001565 | -3.59944 | -0.88819 |
| C | 1.855772 | -0.57788 | -3.09932 |
| H | 2.840451 | -0.22809 | -2.7558  |
| H | 1.124907 | 0.164945 | -2.74794 |
| H | 1.856554 | -0.55194 | -4.19885 |
| C | 0.94397  | -5.35049 | -4.30397 |
| H | 1.936471 | -5.65781 | -4.67706 |
| H | 0.37387  | -4.98661 | -5.17393 |
| H | 0.442507 | -6.25102 | -3.91897 |
| C | 0.754221 | -4.0717  | 0.531256 |
| H | 0.16103  | -4.9985  | 0.5262   |
| H | 0.229512 | -3.33626 | 1.153756 |
| H | 1.697751 | -4.28134 | 1.058471 |
| C | 2.182778 | -1.60947 | 1.3587   |
| C | 3.452798 | -2.24401 | 1.260312 |
| C | 4.141614 | -2.64457 | 2.412382 |
| H | 5.113552 | -3.13596 | 2.299488 |
| C | 3.630853 | -2.43694 | 3.696481 |
| C | 2.406249 | -1.77543 | 3.792051 |
| H | 1.992112 | -1.56898 | 4.783781 |
| C | 1.688514 | -1.35011 | 2.66213  |
| C | 0.395996 | -0.61112 | 2.932774 |
| H | -0.4871  | -1.15544 | 2.564625 |
| H | 0.380788 | 0.385082 | 2.466898 |

|   |          |          |          |
|---|----------|----------|----------|
| H | 0.257829 | -0.46728 | 4.013776 |
| C | 4.120381 | -2.55486 | -0.06389 |
| H | 5.204589 | -2.68249 | 0.07513  |
| H | 3.962022 | -1.77922 | -0.82226 |
| H | 3.728116 | -3.48597 | -0.50244 |
| C | 4.372454 | -2.91258 | 4.920112 |
| H | 4.012362 | -2.41126 | 5.831184 |
| H | 5.455251 | -2.72853 | 4.833081 |
| H | 4.24252  | -3.999   | 5.068652 |
| N | 4.39809  | 4.47369  | -0.53339 |
| N | 5.399487 | 5.323608 | -0.60086 |
| C | 6.772698 | 4.891383 | -0.75085 |
| H | 7.427026 | 5.771454 | -0.75915 |
| H | 6.921918 | 4.327963 | -1.69172 |
| H | 7.072705 | 4.239368 | 0.087232 |
| C | 5.056833 | 6.718185 | -0.79994 |
| H | 5.204713 | 7.032229 | -1.85026 |
| H | 5.673163 | 7.363708 | -0.15422 |
| H | 3.999883 | 6.847433 | -0.5386  |

**Cartesian coordinates of 3 (B3LYP-D3(BJ)/def2-SVP, toluene, PCM model) in  $S_0$  state**

$E = -2604.369406$  Hartrees

| Symbol | X        | Y        | Z        |
|--------|----------|----------|----------|
| C      | 2.178319 | 0.329955 | -0.28419 |
| N      | -0.04475 | -0.56857 | 0.05108  |
| S      | -1.69282 | 1.42506  | -0.00651 |
| O      | -4.28048 | 2.387241 | 0.075576 |
| B      | 1.490113 | -1.13375 | -0.05134 |
| C      | -5.10444 | 1.487132 | 0.137239 |
| S      | 1.819459 | 2.961977 | -0.26717 |
| O      | -6.36372 | -1.86922 | 0.305457 |
| C      | -6.58916 | 1.662079 | 0.185332 |
| C      | -7.33525 | 2.837787 | 0.170401 |
| H      | -6.83796 | 3.80832  | 0.11707  |
| C      | -8.7301  | 2.728462 | 0.225651 |
| H      | -9.34517 | 3.631276 | 0.215651 |
| C      | -9.35455 | 1.471542 | 0.294105 |
| H      | -10.4449 | 1.417834 | 0.336186 |
| C      | -8.59982 | 0.292109 | 0.308972 |
| H      | -9.07257 | -0.69057 | 0.362011 |
| C      | -7.21339 | 0.405685 | 0.253675 |
| C      | -6.17158 | -0.6681  | 0.253952 |
| C      | -4.85945 | 0.031588 | 0.179306 |
| C      | -1.26296 | -1.1321  | 0.091864 |
| H      | -1.36571 | -2.21534 | 0.124508 |
| C      | -2.32792 | -0.23882 | 0.091376 |

|   |          |          |          |
|---|----------|----------|----------|
| C | -3.68253 | -0.66032 | 0.158217 |
| H | -3.80224 | -1.75066 | 0.200561 |
| C | -0.08886 | 0.787385 | -0.04629 |
| C | 1.197475 | 1.335574 | -0.19118 |
| C | 3.46029  | 0.913931 | -0.37993 |
| H | 4.3951   | 0.356091 | -0.43977 |
| C | 3.445699 | 2.308403 | -0.40001 |
| C | 4.579271 | 3.185567 | -0.51459 |
| H | 5.5648   | 2.706949 | -0.57568 |
| C | 1.377318 | -2.26968 | -1.22214 |
| C | 1.54116  | -1.96768 | -2.60084 |
| C | 1.401808 | -2.96755 | -3.57264 |
| H | 1.541858 | -2.70243 | -4.6254  |
| C | 1.073947 | -4.28624 | -3.24375 |
| C | 0.864017 | -4.57184 | -1.89476 |
| H | 0.578298 | -5.58824 | -1.60619 |
| C | 1.004753 | -3.59925 | -0.89029 |
| C | 1.855704 | -0.57466 | -3.0986  |
| H | 2.839959 | -0.22373 | -2.75507 |
| H | 1.123814 | 0.166675 | -2.74624 |
| H | 1.856062 | -0.54782 | -4.19811 |
| C | 0.953544 | -5.34814 | -4.30747 |
| H | 1.947007 | -5.65437 | -4.67887 |
| H | 0.384913 | -4.98417 | -5.17833 |
| H | 0.452165 | -6.24932 | -3.92391 |
| C | 0.756158 | -4.07289 | 0.528456 |
| H | 0.16399  | -5.00031 | 0.521933 |
| H | 0.229708 | -3.33844 | 1.150601 |
| H | 1.699358 | -4.28192 | 1.056517 |
| C | 2.181307 | -1.60996 | 1.359662 |
| C | 3.451876 | -2.2437  | 1.262438 |
| C | 4.13971  | -2.64468 | 2.415029 |
| H | 5.112116 | -3.13532 | 2.302887 |
| C | 3.627351 | -2.4383  | 3.698772 |
| C | 2.402104 | -1.77768 | 3.793317 |
| H | 1.986633 | -1.57226 | 4.784711 |
| C | 1.6853   | -1.35205 | 2.662789 |
| C | 0.391668 | -0.61467 | 2.932727 |
| H | -0.4904  | -1.16017 | 2.5639   |
| H | 0.375331 | 0.381533 | 2.466959 |
| H | 0.252655 | -0.47125 | 4.013675 |
| C | 4.121194 | -2.55337 | -0.06117 |
| H | 5.205404 | -2.67973 | 0.078859 |
| H | 3.962577 | -1.77775 | -0.81944 |
| H | 3.730419 | -3.48499 | -0.50002 |
| C | 4.368002 | -2.91412 | 4.922946 |

|   |          |          |          |
|---|----------|----------|----------|
| H | 4.005154 | -2.41509 | 5.834166 |
| H | 5.450516 | -2.72749 | 4.837969 |
| H | 4.24042  | -4.00108 | 5.069513 |
| N | 4.39715  | 4.474374 | -0.53461 |
| N | 5.397394 | 5.324096 | -0.60401 |
| C | 6.771851 | 4.893001 | -0.74794 |
| H | 7.424791 | 5.773964 | -0.75902 |
| H | 6.923624 | 4.325436 | -1.68563 |
| H | 7.070279 | 4.245329 | 0.094091 |
| C | 5.055833 | 6.720649 | -0.79193 |
| H | 5.215276 | 7.044781 | -1.83724 |
| H | 5.664896 | 7.359962 | -0.13324 |
| H | 3.996116 | 6.846558 | -0.54059 |

**Cartesian coordinates of 3 (B3LYP-D3(BJ)/def2-SVP, CHCl<sub>3</sub>, PCM model) in S<sub>0</sub> state**

*E* = -2604.373939 Hartrees

| Symbol | X        | Y        | Z        |
|--------|----------|----------|----------|
| C      | 2.179324 | 0.330092 | -0.28244 |
| N      | -0.04508 | -0.56817 | 0.049625 |
| S      | -1.69244 | 1.426121 | -0.00872 |
| O      | -4.28474 | 2.38846  | 0.073649 |
| B      | 1.489235 | -1.13331 | -0.04988 |
| C      | -5.10781 | 1.486555 | 0.135079 |
| S      | 1.821035 | 2.962179 | -0.27302 |
| O      | -6.36165 | -1.87121 | 0.303237 |
| C      | -6.59239 | 1.659924 | 0.182551 |
| C      | -7.34047 | 2.834298 | 0.167148 |
| H      | -6.84641 | 3.806444 | 0.11384  |
| C      | -8.73543 | 2.722706 | 0.221911 |
| H      | -9.3518  | 3.624499 | 0.211508 |
| C      | -9.35784 | 1.464846 | 0.290362 |
| H      | -10.448  | 1.409227 | 0.332057 |
| C      | -8.60097 | 0.286482 | 0.305724 |
| H      | -9.07376 | -0.69615 | 0.358808 |
| C      | -7.2147  | 0.402288 | 0.250926 |
| C      | -6.17089 | -0.66871 | 0.251693 |
| C      | -4.86039 | 0.031913 | 0.177439 |
| C      | -1.26302 | -1.13122 | 0.091285 |
| H      | -1.36738 | -2.21421 | 0.126564 |
| C      | -2.32821 | -0.23764 | 0.089919 |
| C      | -3.68197 | -0.65914 | 0.156925 |
| H      | -3.79966 | -1.74951 | 0.199897 |
| C      | -0.08816 | 0.788705 | -0.04822 |
| C      | 1.197607 | 1.336017 | -0.19214 |
| C      | 3.461174 | 0.912412 | -0.37954 |
| H      | 4.396145 | 0.35497  | -0.44024 |

|   |          |          |          |
|---|----------|----------|----------|
| C | 3.448215 | 2.307912 | -0.40345 |
| C | 4.580909 | 3.18358  | -0.51967 |
| H | 5.566977 | 2.706984 | -0.58055 |
| C | 1.381237 | -2.26855 | -1.22273 |
| C | 1.546789 | -1.96411 | -2.60099 |
| C | 1.413784 | -2.96343 | -3.57475 |
| H | 1.555047 | -2.69626 | -4.62683 |
| C | 1.090661 | -4.28423 | -3.24852 |
| C | 0.878009 | -4.5722  | -1.9002  |
| H | 0.594844 | -5.58989 | -1.61364 |
| C | 1.012272 | -3.60004 | -0.89408 |
| C | 1.855959 | -0.56918 | -3.09702 |
| H | 2.83941  | -0.21569 | -2.75397 |
| H | 1.121831 | 0.168763 | -2.74231 |
| H | 1.854916 | -0.54081 | -4.19647 |
| C | 0.977799 | -5.34554 | -4.31378 |
| H | 1.974005 | -5.65285 | -4.67686 |
| H | 0.417605 | -4.98025 | -5.18946 |
| H | 0.47226  | -6.2463  | -3.93475 |
| C | 0.760057 | -4.0763  | 0.52306  |
| H | 0.169284 | -5.00449 | 0.513233 |
| H | 0.230166 | -3.34345 | 1.143969 |
| H | 1.702426 | -4.28504 | 1.052837 |
| C | 2.176448 | -1.61053 | 1.363293 |
| C | 3.44872  | -2.24198 | 1.270356 |
| C | 4.134245 | -2.64178 | 2.425024 |
| H | 5.1081   | -3.13017 | 2.315711 |
| C | 3.617674 | -2.43651 | 3.707558 |
| C | 2.39029  | -1.77878 | 3.798208 |
| H | 1.971145 | -1.57468 | 4.788345 |
| C | 1.675584 | -1.35472 | 2.665258 |
| C | 0.378285 | -0.62249 | 2.932295 |
| H | -0.50041 | -1.17255 | 2.562367 |
| H | 0.357809 | 0.373039 | 2.465395 |
| H | 0.23689  | -0.47888 | 4.012903 |
| C | 4.122787 | -2.55062 | -0.05107 |
| H | 5.207012 | -2.67292 | 0.091766 |
| H | 3.963153 | -1.77646 | -0.81045 |
| H | 3.736264 | -3.48464 | -0.48869 |
| C | 4.356375 | -2.90986 | 4.933995 |
| H | 3.983825 | -2.41782 | 5.845034 |
| H | 5.437521 | -2.71297 | 4.855189 |
| H | 4.238667 | -3.99855 | 5.075616 |
| N | 4.396006 | 4.473953 | -0.54336 |
| N | 5.392668 | 5.322451 | -0.62088 |
| C | 6.771209 | 4.894662 | -0.74145 |

|   |          |          |          |
|---|----------|----------|----------|
| H | 7.419645 | 5.778301 | -0.76606 |
| H | 6.931774 | 4.308914 | -1.6654  |
| H | 7.063701 | 4.265699 | 0.116847 |
| C | 5.056141 | 6.726154 | -0.76319 |
| H | 5.268526 | 7.092323 | -1.78395 |
| H | 5.629933 | 7.337812 | -0.04856 |
| H | 3.98503  | 6.839756 | -0.55969 |

**Cartesian coordinates of 3 (B3LYP-D3(BJ)/def2-SVP, THF, PCM model) in S<sub>0</sub> state**

*E* = -2604.37601 Hartrees

| Symbol | X        | Y        | Z        |
|--------|----------|----------|----------|
| C      | 2.179687 | 0.329128 | -0.28316 |
| N      | -0.04534 | -0.56809 | 0.049663 |
| S      | -1.6919  | 1.426869 | -0.00958 |
| O      | -4.28628 | 2.389906 | 0.073095 |
| B      | 1.488466 | -1.13376 | -0.04917 |
| C      | -5.10905 | 1.487313 | 0.134705 |
| S      | 1.822653 | 2.961361 | -0.27741 |
| O      | -6.36096 | -1.87079 | 0.304549 |
| C      | -6.59355 | 1.660207 | 0.181454 |
| C      | -7.34232 | 2.834094 | 0.164923 |
| H      | -6.84951 | 3.806834 | 0.111178 |
| C      | -8.73737 | 2.721756 | 0.219129 |
| H      | -9.35418 | 3.623177 | 0.207823 |
| C      | -9.35908 | 1.463612 | 0.288144 |
| H      | -10.4492 | 1.407347 | 0.329369 |
| C      | -8.60146 | 0.285608 | 0.304665 |
| H      | -9.07447 | -0.6969  | 0.358212 |
| C      | -7.21522 | 0.402157 | 0.250434 |
| C      | -6.17066 | -0.66774 | 0.252339 |
| C      | -4.86075 | 0.03308  | 0.178074 |
| C      | -1.26329 | -1.13061 | 0.092546 |
| H      | -1.36859 | -2.21344 | 0.129777 |
| C      | -2.32835 | -0.23663 | 0.090631 |
| C      | -3.6818  | -0.65782 | 0.158267 |
| H      | -3.79881 | -1.74815 | 0.202349 |
| C      | -0.08764 | 0.789142 | -0.04911 |
| C      | 1.198014 | 1.335572 | -0.19353 |
| C      | 3.461635 | 0.910152 | -0.38223 |
| H      | 4.396384 | 0.352486 | -0.44429 |
| C      | 3.449942 | 2.306133 | -0.40809 |
| C      | 4.582454 | 3.180656 | -0.52622 |
| H      | 5.568396 | 2.704523 | -0.5895  |
| C      | 1.381324 | -2.26955 | -1.22193 |
| C      | 1.546769 | -1.96516 | -2.60036 |
| C      | 1.414849 | -2.96484 | -3.57415 |

|   |          |          |          |
|---|----------|----------|----------|
| H | 1.555998 | -2.69766 | -4.62624 |
| C | 1.092957 | -4.28605 | -3.24786 |
| C | 0.880046 | -4.57394 | -1.89942 |
| H | 0.597378 | -5.59175 | -1.61277 |
| C | 1.013198 | -3.60137 | -0.8934  |
| C | 1.854439 | -0.57003 | -3.0969  |
| H | 2.838139 | -0.2161  | -2.75507 |
| H | 1.120256 | 0.167337 | -2.74115 |
| H | 1.851998 | -0.54183 | -4.19634 |
| C | 0.981754 | -5.34784 | -4.31285 |
| H | 1.978747 | -5.65892 | -4.67055 |
| H | 0.427631 | -4.98123 | -5.19178 |
| H | 0.471308 | -6.24657 | -3.9356  |
| C | 0.760383 | -4.07754 | 0.523625 |
| H | 0.169126 | -5.00537 | 0.513624 |
| H | 0.230533 | -3.34438 | 1.144111 |
| H | 1.702794 | -4.28703 | 1.053122 |
| C | 2.174914 | -1.61011 | 1.364959 |
| C | 3.447885 | -2.24067 | 1.273588 |
| C | 4.133648 | -2.63807 | 2.429075 |
| H | 5.108077 | -3.12552 | 2.32076  |
| C | 3.616564 | -2.43127 | 3.711318 |
| C | 2.388158 | -1.775   | 3.800501 |
| H | 1.968316 | -1.57017 | 4.790195 |
| C | 1.673094 | -1.35353 | 2.666553 |
| C | 0.374153 | -0.62372 | 2.932585 |
| H | -0.50309 | -1.17631 | 2.563088 |
| H | 0.351235 | 0.371162 | 2.464472 |
| H | 0.232327 | -0.47931 | 4.013022 |
| C | 4.122755 | -2.55079 | -0.04708 |
| H | 5.207111 | -2.67107 | 0.096094 |
| H | 3.961944 | -1.77838 | -0.80793 |
| H | 3.737702 | -3.48657 | -0.4823  |
| C | 4.355988 | -2.9012  | 4.938689 |
| H | 3.977763 | -2.4134  | 5.849636 |
| H | 5.435856 | -2.69642 | 4.862467 |
| H | 4.246166 | -3.99096 | 5.078135 |
| N | 4.396913 | 4.471875 | -0.5498  |
| N | 5.392151 | 5.319343 | -0.63377 |
| C | 6.771957 | 4.892447 | -0.74696 |
| H | 7.418574 | 5.776862 | -0.78282 |
| H | 6.93296  | 4.295758 | -1.66328 |
| H | 7.064579 | 4.274557 | 0.119447 |
| C | 5.058782 | 6.726806 | -0.74563 |
| H | 5.300785 | 7.119252 | -1.74934 |
| H | 5.611891 | 7.319106 | 0.00124  |

|   |          |         |          |
|---|----------|---------|----------|
| H | 3.982378 | 6.83483 | -0.56928 |
|---|----------|---------|----------|

**Cartesian coordinates of 3 (B3LYP-D3(BJ)/def2-SVP, CH<sub>2</sub>Cl<sub>2</sub>, PCM model) in S<sub>0</sub> state**

E = -2604.376668 Hartrees

| Symbol | X        | Y        | Z        |
|--------|----------|----------|----------|
| C      | 2.179775 | 0.328665 | 0.28359  |
| N      | -0.04545 | -0.56808 | -0.04985 |
| S      | -1.69167 | 1.427144 | 0.009693 |
| O      | -4.2867  | 2.390489 | -0.07306 |
| B      | 1.488156 | -1.134   | 0.048937 |
| C      | -5.1094  | 1.487701 | -0.13474 |
| S      | 1.823305 | 2.960963 | 0.27891  |
| O      | -6.36078 | -1.87046 | -0.30533 |
| C      | -6.59388 | 1.660481 | -0.18115 |
| C      | -7.34284 | 2.834233 | -0.16409 |
| H      | -6.85038 | 3.807141 | -0.11016 |
| C      | -8.73792 | 2.721701 | -0.21802 |
| H      | -9.35484 | 3.623018 | -0.2063  |
| C      | -9.35945 | 1.46349  | -0.28728 |
| H      | -10.4495 | 1.407054 | -0.32828 |
| C      | -8.60161 | 0.285581 | -0.30434 |
| H      | -9.07472 | -0.69686 | -0.35809 |
| C      | -7.21538 | 0.402324 | -0.25039 |
| C      | -6.1706  | -0.66725 | -0.25282 |
| C      | -4.86087 | 0.033596 | -0.17856 |
| C      | -1.26341 | -1.13039 | -0.09324 |
| H      | -1.36905 | -2.21316 | -0.13117 |
| C      | -2.3284  | -0.23624 | -0.09116 |
| C      | -3.68177 | -0.65729 | -0.15906 |
| H      | -3.7986  | -1.7476  | -0.2036  |
| C      | -0.08745 | 0.789253 | 0.049277 |
| C      | 1.198195 | 1.335333 | 0.194002 |
| C      | 3.461776 | 0.909195 | 0.383536 |
| H      | 4.396404 | 0.351393 | 0.446256 |
| C      | 3.450567 | 2.305328 | 0.409989 |
| C      | 4.583052 | 3.179422 | 0.528959 |
| H      | 5.56888  | 2.703359 | 0.593548 |
| C      | 2.174568 | -1.6099  | -1.36547 |
| C      | 3.447748 | -2.24019 | -1.27449 |
| C      | 4.133838 | -2.63654 | -2.43019 |
| H      | 5.108436 | -3.1237  | -2.3221  |
| C      | 3.616862 | -2.42894 | -3.7124  |
| C      | 2.388117 | -1.77318 | -3.80121 |
| H      | 1.968241 | -1.56791 | -4.7908  |
| C      | 1.672684 | -1.35282 | -2.66699 |
| C      | 4.122618 | -2.55107 | 0.046001 |

|   |          |          |          |
|---|----------|----------|----------|
| H | 3.737945 | -3.48751 | 0.480185 |
| H | 3.9613   | -1.77939 | 0.807459 |
| H | 5.207041 | -2.67069 | -0.09709 |
| C | 4.356805 | -2.89742 | -4.94002 |
| H | 4.249737 | -3.98751 | -5.07897 |
| H | 5.436202 | -2.68995 | -4.8644  |
| H | 3.97684  | -2.41091 | -5.85092 |
| C | 0.373221 | -0.62382 | -2.93281 |
| H | 0.23138  | -0.47908 | -4.0132  |
| H | 0.349417 | 0.370819 | -2.46424 |
| H | -0.50357 | -1.17729 | -2.56359 |
| C | 1.381048 | -2.27007 | 1.221519 |
| C | 1.546306 | -1.96585 | 2.600057 |
| C | 1.414455 | -2.96572 | 3.573742 |
| H | 1.555462 | -2.69866 | 4.625885 |
| C | 1.092817 | -4.28699 | 3.247252 |
| C | 0.879997 | -4.57471 | 1.89872  |
| H | 0.597407 | -5.59249 | 1.611903 |
| C | 1.013076 | -3.60192 | 0.892847 |
| C | 0.760253 | -4.07789 | -0.52423 |
| H | 1.702749 | -4.28781 | -1.05344 |
| H | 0.230706 | -3.34447 | -1.14464 |
| H | 0.168637 | -5.00548 | -0.51437 |
| C | 1.853643 | -0.57075 | 3.096931 |
| H | 1.85061  | -0.54271 | 4.196369 |
| H | 1.119605 | 0.166579 | 2.740818 |
| H | 2.837529 | -0.21681 | 2.75567  |
| C | 0.98177  | -5.34899 | 4.312073 |
| H | 0.470639 | -6.24737 | 3.934927 |
| H | 0.428535 | -4.98227 | 5.191503 |
| H | 1.978848 | -5.66066 | 4.669016 |
| N | 4.397417 | 4.470927 | 0.552068 |
| N | 5.392231 | 5.318016 | 0.638495 |
| C | 6.772311 | 4.891288 | 0.750377 |
| H | 7.418395 | 5.775859 | 0.790444 |
| H | 7.065626 | 4.27702  | -0.11842 |
| H | 6.932656 | 4.291021 | 1.664295 |
| C | 5.059974 | 6.726646 | 0.739492 |
| H | 5.606503 | 7.311903 | -0.01783 |
| H | 5.311328 | 7.128047 | 1.737149 |
| H | 3.982081 | 6.833181 | 0.571687 |

**Cartesian coordinates of 3 (B3LYP-D3(BJ)/def2-SVP, acetone, PCM model) in S<sub>0</sub> state***E* = -2604.376668 Hartrees

| Symbol | X        | Y        | Z        |
|--------|----------|----------|----------|
| C      | 2.179959 | 0.326617 | -0.28604 |
| N      | -0.04585 | -0.56815 | 0.050707 |
| S      | -1.69081 | 1.428052 | -0.01052 |
| O      | -4.28774 | 2.392657 | 0.072335 |
| B      | 1.487005 | -1.13514 | -0.0482  |
| C      | -5.11031 | 1.489399 | 0.134786 |
| S      | 1.825699 | 2.959162 | -0.28526 |
| O      | -6.36043 | -1.86871 | 0.309751 |
| C      | -6.59469 | 1.662001 | 0.180054 |
| C      | -7.34408 | 2.835411 | 0.160673 |
| H      | -6.85259 | 3.808729 | 0.105551 |
| C      | -8.73927 | 2.722478 | 0.213833 |
| H      | -9.35645 | 3.623535 | 0.20027  |
| C      | -9.36038 | 1.464171 | 0.284618 |
| H      | -10.4504 | 1.407362 | 0.324939 |
| C      | -8.60205 | 0.286479 | 0.304051 |
| H      | -9.07558 | -0.69571 | 0.359011 |
| C      | -7.21582 | 0.403627 | 0.250878 |
| C      | -6.1705  | -0.66508 | 0.255593 |
| C      | -4.86119 | 0.035685 | 0.180874 |
| C      | -1.26396 | -1.12964 | 0.096258 |
| H      | -1.37071 | -2.21219 | 0.137019 |
| C      | -2.32856 | -0.23484 | 0.093401 |
| C      | -3.68174 | -0.65528 | 0.162617 |
| H      | -3.79813 | -1.74548 | 0.209313 |
| C      | -0.08679 | 0.789423 | -0.05022 |
| C      | 1.198895 | 1.334168 | -0.19652 |
| C      | 3.462205 | 0.905355 | -0.38943 |
| H      | 4.396304 | 0.34691  | -0.45449 |
| C      | 3.452715 | 2.301939 | -0.41804 |
| C      | 4.5852   | 3.174557 | -0.54016 |
| H      | 5.570523 | 2.698547 | -0.60989 |
| C      | 1.379268 | -2.27278 | -1.21946 |
| C      | 1.543606 | -1.97002 | -2.59857 |
| C      | 1.411033 | -2.97102 | -3.57124 |
| H      | 1.551345 | -2.7051  | -4.62375 |
| C      | 1.089581 | -4.29208 | -3.24317 |
| C      | 0.877406 | -4.57831 | -1.89408 |
| H      | 0.594592 | -5.59566 | -1.60599 |
| C      | 1.01122  | -3.6043  | -0.88933 |
| C      | 1.850551 | -0.57552 | -3.09748 |
| H      | 2.835326 | -0.22191 | -2.7585  |
| H      | 1.117496 | 0.162366 | -2.74052 |

|   |          |          |          |
|---|----------|----------|----------|
| H | 1.845393 | -0.54868 | -4.19692 |
| C | 0.978247 | -5.35545 | -4.30664 |
| H | 1.975479 | -5.67259 | -4.65833 |
| H | 0.431222 | -4.98755 | -5.18939 |
| H | 0.461204 | -6.25072 | -3.93019 |
| C | 0.758785 | -4.07864 | 0.528327 |
| H | 0.165161 | -5.0049  | 0.51978  |
| H | 0.231285 | -3.34359 | 1.148456 |
| H | 1.701684 | -4.29059 | 1.056152 |
| C | 2.173933 | -1.60864 | 1.367097 |
| C | 3.447668 | -2.23831 | 1.277154 |
| C | 4.135554 | -2.63006 | 2.433498 |
| H | 5.110596 | -3.11643 | 2.326016 |
| C | 3.619809 | -2.41848 | 3.715716 |
| C | 2.390024 | -1.76427 | 3.803497 |
| H | 1.970679 | -1.55663 | 4.792815 |
| C | 1.672649 | -1.34869 | 2.668469 |
| C | 0.371658 | -0.62211 | 2.933693 |
| H | -0.50385 | -1.17857 | 2.566052 |
| H | 0.344838 | 0.371491 | 2.463087 |
| H | 0.230196 | -0.47566 | 4.013889 |
| C | 4.121704 | -2.55292 | -0.04286 |
| H | 5.206366 | -2.67073 | 0.099493 |
| H | 3.958669 | -1.78408 | -0.80677 |
| H | 3.737683 | -3.49165 | -0.47279 |
| C | 4.362212 | -2.88104 | 4.944146 |
| H | 3.977924 | -2.39701 | 5.85451  |
| H | 5.440141 | -2.66587 | 4.869119 |
| H | 4.263264 | -3.97184 | 5.083271 |
| N | 4.399501 | 4.466958 | -0.56099 |
| N | 5.392942 | 5.312829 | -0.65665 |
| C | 6.773733 | 4.886507 | -0.76545 |
| H | 7.417996 | 5.771378 | -0.82164 |
| H | 6.930636 | 4.273225 | -1.67071 |
| H | 7.070694 | 4.285488 | 0.111551 |
| C | 5.064785 | 6.72497  | -0.7173  |
| H | 5.350066 | 7.158891 | -1.69125 |
| H | 5.58661  | 7.283104 | 0.077507 |
| H | 3.982117 | 6.827386 | -0.58101 |

**Cartesian coordinates of 3 (B3LYP-D3(BJ)/def2-SVP, EtOH, PCM model) in S<sub>0</sub> state**  
*E* = -2604.378948 Hartrees

| Symbol | X        | Y        | Z        |
|--------|----------|----------|----------|
| C      | 2.179982 | 0.326253 | -0.28648 |
| N      | -0.04592 | -0.56817 | 0.050874 |
| S      | -1.69067 | 1.428186 | -0.0107  |

|   |          |          |          |
|---|----------|----------|----------|
| O | -4.28787 | 2.393008 | 0.072153 |
| B | 1.48682  | -1.13534 | -0.04808 |
| C | -5.11043 | 1.489695 | 0.134784 |
| S | 1.82609  | 2.958837 | -0.28634 |
| O | -6.36039 | -1.86838 | 0.310622 |
| C | -6.59479 | 1.662288 | 0.179887 |
| C | -7.34423 | 2.835656 | 0.160094 |
| H | -6.85286 | 3.809023 | 0.104729 |
| C | -8.73943 | 2.722685 | 0.21316  |
| H | -9.35664 | 3.62371  | 0.199274 |
| C | -9.3605  | 1.464377 | 0.284257 |
| H | -10.4505 | 1.40753  | 0.324493 |
| C | -8.60211 | 0.286709 | 0.304111 |
| H | -9.07571 | -0.69543 | 0.359318 |
| C | -7.21588 | 0.403895 | 0.251033 |
| C | -6.17049 | -0.6647  | 0.256143 |
| C | -4.86124 | 0.036039 | 0.181298 |
| C | -1.26406 | -1.12953 | 0.0968   |
| H | -1.37098 | -2.21203 | 0.138051 |
| C | -2.32859 | -0.23462 | 0.093791 |
| C | -3.68175 | -0.65495 | 0.163256 |
| H | -3.79808 | -1.74513 | 0.210352 |
| C | -0.08669 | 0.789426 | -0.0504  |
| C | 1.199016 | 1.333951 | -0.19697 |
| C | 3.462275 | 0.904702 | -0.39042 |
| H | 4.396282 | 0.346139 | -0.45583 |
| C | 3.453057 | 2.301348 | -0.41938 |
| C | 4.585549 | 3.173741 | -0.54201 |
| H | 5.57079  | 2.697731 | -0.61254 |
| C | 1.378913 | -2.27326 | -1.21909 |
| C | 1.543118 | -1.97079 | -2.5983  |
| C | 1.410336 | -2.972   | -3.57077 |
| H | 1.550552 | -2.7063  | -4.62335 |
| C | 1.088804 | -4.29299 | -3.2424  |
| C | 0.876733 | -4.57891 | -1.89321 |
| H | 0.593812 | -5.59617 | -1.60488 |
| C | 1.010759 | -3.60469 | -0.88867 |
| C | 1.85013  | -0.57644 | -3.09758 |
| H | 2.835071 | -0.22295 | -2.75896 |
| H | 1.117289 | 0.16162  | -2.74054 |
| H | 1.844659 | -0.54983 | -4.19703 |
| C | 0.977309 | -5.35659 | -4.30563 |
| H | 1.974519 | -5.67455 | -4.65663 |
| H | 0.431112 | -4.98854 | -5.18882 |
| H | 0.459427 | -6.25138 | -3.9292  |
| C | 0.758396 | -4.07871 | 0.529095 |

|   |          |          |          |
|---|----------|----------|----------|
| H | 0.164304 | -5.00467 | 0.520805 |
| H | 0.231384 | -3.34331 | 1.149212 |
| H | 1.701357 | -4.29114 | 1.056642 |
| C | 2.173884 | -1.60843 | 1.367342 |
| C | 3.44769  | -2.23803 | 1.277524 |
| C | 4.135927 | -2.62898 | 2.433949 |
| H | 5.111022 | -3.11525 | 2.326534 |
| C | 3.620468 | -2.41666 | 3.716186 |
| C | 2.390532 | -1.76269 | 3.803839 |
| H | 1.971336 | -1.5546  | 4.793126 |
| C | 1.672779 | -1.34794 | 2.668703 |
| C | 0.371571 | -0.6217  | 2.933861 |
| H | -0.50376 | -1.17863 | 2.566533 |
| H | 0.344268 | 0.371712 | 2.462894 |
| H | 0.230218 | -0.47493 | 4.014027 |
| C | 4.121507 | -2.55332 | -0.04244 |
| H | 5.206204 | -2.67094 | 0.099752 |
| H | 3.95823  | -1.78494 | -0.80675 |
| H | 3.737499 | -3.49239 | -0.47166 |
| C | 4.363357 | -2.87818 | 4.944721 |
| H | 3.978196 | -2.39477 | 5.855038 |
| H | 5.440981 | -2.66142 | 4.869855 |
| H | 4.266058 | -3.96914 | 5.083741 |
| N | 4.399848 | 4.466269 | -0.56251 |
| N | 5.393068 | 5.311976 | -0.6597  |
| C | 6.773965 | 4.885712 | -0.76801 |
| H | 7.417932 | 5.7706   | -0.82692 |
| H | 6.930293 | 4.27024  | -1.67179 |
| H | 7.071564 | 4.286943 | 0.110351 |
| C | 5.065566 | 6.72457  | -0.71379 |
| H | 5.356615 | 7.163727 | -1.68356 |
| H | 5.583029 | 7.278109 | 0.087143 |
| H | 3.982181 | 6.826497 | -0.58298 |

**Cartesian coordinates of 3 (B3LYP-D3(BJ)/def2-SVP, MeCN, PCM model) in S<sub>0</sub> state**

*E* = -2604.37937 Hartrees

| Symbol | X        | Y        | Z        |
|--------|----------|----------|----------|
| C      | 2.180026 | 0.32573  | -0.28699 |
| N      | -0.04601 | -0.56821 | 0.051136 |
| S      | -1.69046 | 1.42837  | -0.01092 |
| O      | -4.28805 | 2.393504 | 0.071952 |
| B      | 1.486556 | -1.13566 | -0.04789 |
| C      | -5.11059 | 1.490113 | 0.134809 |
| S      | 1.826675 | 2.958366 | -0.28769 |
| O      | -6.36034 | -1.86792 | 0.311764 |
| C      | -6.59493 | 1.662694 | 0.179688 |

|   |          |          |          |
|---|----------|----------|----------|
| C | -7.34443 | 2.836004 | 0.159354 |
| H | -6.85325 | 3.809441 | 0.10368  |
| C | -8.73966 | 2.72298  | 0.212287 |
| H | -9.35691 | 3.62396  | 0.197976 |
| C | -9.36067 | 1.464667 | 0.283782 |
| H | -10.4507 | 1.407766 | 0.323898 |
| C | -8.6022  | 0.287031 | 0.304188 |
| H | -9.07591 | -0.69504 | 0.359712 |
| C | -7.21596 | 0.404272 | 0.251246 |
| C | -6.17049 | -0.66416 | 0.256879 |
| C | -4.8613  | 0.036536 | 0.181881 |
| C | -1.2642  | -1.12938 | 0.097559 |
| H | -1.37138 | -2.21182 | 0.13949  |
| C | -2.32863 | -0.23431 | 0.094339 |
| C | -3.68176 | -0.65449 | 0.164135 |
| H | -3.79801 | -1.74464 | 0.211774 |
| C | -0.08653 | 0.789419 | -0.05059 |
| C | 1.199202 | 1.333635 | -0.1975  |
| C | 3.462398 | 0.903758 | -0.39164 |
| H | 4.396271 | 0.345024 | -0.45755 |
| C | 3.453575 | 2.300495 | -0.42108 |
| C | 4.586077 | 3.172576 | -0.54439 |
| H | 5.571212 | 2.696577 | -0.61594 |
| C | 1.378411 | -2.27389 | -1.21861 |
| C | 1.542488 | -1.97177 | -2.59795 |
| C | 1.409388 | -2.9732  | -3.5702  |
| H | 1.54952  | -2.70778 | -4.62286 |
| C | 1.087662 | -4.29409 | -3.24149 |
| C | 0.875686 | -4.57965 | -1.89218 |
| H | 0.592556 | -5.59677 | -1.60356 |
| C | 1.010034 | -3.60519 | -0.88788 |
| C | 1.849696 | -0.57761 | -3.09767 |
| H | 2.834879 | -0.22437 | -2.7595  |
| H | 1.117185 | 0.160715 | -2.7405  |
| H | 1.843835 | -0.55127 | -4.19712 |
| C | 0.975887 | -5.35795 | -4.30443 |
| H | 1.97304  | -5.67683 | -4.65477 |
| H | 0.430562 | -4.98972 | -5.18808 |
| H | 0.457094 | -6.25221 | -3.92799 |
| C | 0.757726 | -4.07883 | 0.530015 |
| H | 0.162831 | -5.00427 | 0.522026 |
| H | 0.231532 | -3.34291 | 1.150187 |
| H | 1.700756 | -4.29214 | 1.057123 |
| C | 2.173803 | -1.60822 | 1.367688 |
| C | 3.447708 | -2.23773 | 1.278024 |
| C | 4.136469 | -2.62753 | 2.434555 |

|   |          |          |          |
|---|----------|----------|----------|
| H | 5.111643 | -3.11365 | 2.327216 |
| C | 3.621439 | -2.41416 | 3.716827 |
| C | 2.39128  | -1.76054 | 3.804322 |
| H | 1.972307 | -1.55182 | 4.79357  |
| C | 1.672962 | -1.34698 | 2.669045 |
| C | 0.371433 | -0.62127 | 2.934135 |
| H | -0.50363 | -1.17888 | 2.567231 |
| H | 0.343418 | 0.371893 | 2.462686 |
| H | 0.23023  | -0.47409 | 4.014262 |
| C | 4.121205 | -2.55397 | -0.04188 |
| H | 5.205946 | -2.67134 | 0.100081 |
| H | 3.957618 | -1.78619 | -0.80672 |
| H | 3.737177 | -3.49348 | -0.47013 |
| C | 4.365038 | -2.8742  | 4.945498 |
| H | 3.978831 | -2.39147 | 5.855724 |
| H | 5.442266 | -2.65545 | 4.870724 |
| H | 4.26985  | -3.96533 | 5.084527 |
| N | 4.400348 | 4.465276 | -0.56451 |
| N | 5.393254 | 5.310783 | -0.66371 |
| C | 6.774299 | 4.884609 | -0.77142 |
| H | 7.417863 | 5.769519 | -0.83385 |
| H | 6.929863 | 4.266318 | -1.67328 |
| H | 7.072726 | 4.288758 | 0.10869  |
| C | 5.066567 | 6.72391  | -0.70956 |
| H | 5.365027 | 7.169604 | -1.67393 |
| H | 5.5784   | 7.271571 | 0.099102 |
| H | 3.982308 | 6.825323 | -0.58583 |

**Cartesian coordinates of 2 (B3LYP-D3(BJ)/def2-SVP, *n*-hexane, PCM model) in S<sub>1</sub> state**

*E* = -2986.026246 Hartrees

| Symbol | X        | Y        | Z        |
|--------|----------|----------|----------|
| C      | 0.73994  | -1.07703 | -0.18631 |
| N      | -1.66447 | -0.98082 | 0.069095 |
| S      | -2.33733 | 1.515586 | 0.057942 |
| O      | -4.29001 | 3.461249 | 0.119988 |
| B      | -0.49826 | -2.1302  | -0.0305  |
| C      | -5.41515 | 2.986371 | 0.131397 |
| S      | 1.502386 | 1.463178 | -0.05613 |
| O      | -7.96006 | 0.455207 | 0.148687 |
| C      | -6.69356 | 3.76143  | 0.155793 |
| C      | -6.88194 | 5.141211 | 0.169514 |
| H      | -6.02387 | 5.816257 | 0.1625   |
| C      | -8.19661 | 5.621673 | 0.192203 |
| H      | -8.37984 | 6.698621 | 0.203396 |
| C      | -9.28933 | 4.737983 | 0.200788 |
| H      | -10.3039 | 5.142747 | 0.218482 |

|   |          |          |          |
|---|----------|----------|----------|
| C | -9.09496 | 3.351541 | 0.186918 |
| H | -9.93504 | 2.654157 | 0.19321  |
| C | -7.78577 | 2.878114 | 0.164371 |
| C | -7.28644 | 1.468174 | 0.145913 |
| C | -5.79884 | 1.559381 | 0.124124 |
| C | -3.00887 | -0.98975 | 0.062571 |
| H | -3.5509  | -1.93362 | 0.048657 |
| C | -3.60607 | 0.264283 | 0.076814 |
| C | -5.01706 | 0.442332 | 0.100544 |
| H | -5.58007 | -0.50008 | 0.099347 |
| C | -1.14261 | 0.271585 | 0.026459 |
| C | 0.263252 | 0.240372 | -0.06902 |
| C | 2.153227 | -1.07524 | -0.22623 |
| H | 2.775177 | -1.96862 | -0.28866 |
| C | 2.714554 | 0.198545 | -0.18226 |
| C | 4.116015 | 0.524741 | -0.22527 |
| H | 4.819252 | -0.31642 | -0.28792 |
| C | -1.03451 | -3.07556 | -1.25113 |
| C | -0.71026 | -2.82803 | -2.61201 |
| C | -1.22574 | -3.64325 | -3.6283  |
| H | -0.95052 | -3.42944 | -4.6659  |
| C | -2.09086 | -4.70873 | -3.36245 |
| C | -2.4467  | -4.92248 | -2.03094 |
| H | -3.14334 | -5.73201 | -1.79165 |
| C | -1.94287 | -4.13362 | -0.98303 |
| C | 0.182527 | -1.68599 | -3.04315 |
| C | -2.61178 | -5.58551 | -4.47297 |
| C | -2.41264 | -4.5055  | 0.409911 |
| C | -0.11271 | -2.89488 | 1.369624 |
| C | 0.779791 | -3.99804 | 1.265259 |
| C | 1.202496 | -4.68424 | 2.411221 |
| H | 1.884506 | -5.53267 | 2.29406  |
| C | 0.784727 | -4.32129 | 3.694174 |
| C | -0.05466 | -3.2114  | 3.797364 |
| H | -0.37499 | -2.88029 | 4.790027 |
| C | -0.49381 | -2.4914  | 2.674661 |
| C | -1.36486 | -1.286   | 2.953995 |
| C | 1.299473 | -4.51783 | -0.05959 |
| C | 1.218857 | -5.10064 | 4.909668 |
| N | 4.491066 | 1.7625   | -0.18575 |
| N | 5.778511 | 2.110296 | -0.21448 |
| C | 6.814021 | 1.118825 | -0.28264 |
| C | 8.786748 | -0.84538 | -0.41576 |
| C | 7.323627 | 0.56813  | 0.897532 |
| C | 7.28087  | 0.689674 | -1.52904 |
| C | 8.271125 | -0.29341 | -1.59278 |

|   |          |          |          |
|---|----------|----------|----------|
| C | 8.313034 | -0.41531 | 0.827866 |
| C | 6.093633 | 3.486655 | -0.17775 |
| C | 6.735838 | 6.225292 | -0.10495 |
| C | 7.437102 | 3.901602 | -0.18786 |
| C | 5.072218 | 4.453192 | -0.13064 |
| C | 5.400434 | 5.806951 | -0.09458 |
| C | 7.74649  | 5.26244  | -0.1518  |
| H | 8.238472 | 3.164298 | -0.22327 |
| H | 8.79551  | 5.568321 | -0.16012 |
| H | 6.983923 | 7.288309 | -0.07683 |
| H | 4.596522 | 6.546407 | -0.05817 |
| H | 4.03438  | 4.1262   | -0.12285 |
| H | 6.942475 | 0.917768 | 1.858846 |
| H | 8.716147 | -0.84574 | 1.74716  |
| H | 9.561255 | -1.61387 | -0.46778 |
| H | 8.641731 | -0.62854 | -2.56401 |
| H | 6.867176 | 1.133505 | -2.43653 |
| H | 0.238366 | -1.63171 | -4.14017 |
| H | 1.20862  | -1.79469 | -2.6617  |
| H | -0.18099 | -0.71408 | -2.67886 |
| H | 1.506887 | -3.72348 | -0.78627 |
| H | 0.567911 | -5.18285 | -0.54511 |
| H | -3.34245 | -5.09136 | 0.354421 |
| H | -2.59483 | -3.63976 | 1.058722 |
| H | -3.46355 | -6.19697 | -4.13945 |
| H | -1.83011 | -6.27587 | -4.83502 |
| H | -2.93749 | -4.98811 | -5.33965 |
| H | -1.66464 | -5.11566 | 0.939682 |
| H | 2.224887 | -5.09367 | 0.092041 |
| H | 0.601547 | -6.00631 | 5.044336 |
| H | 2.26479  | -5.43504 | 4.822785 |
| H | 1.125686 | -4.50182 | 5.82837  |
| H | -1.4674  | -1.13204 | 4.037514 |
| H | -2.38149 | -1.39488 | 2.546363 |
| H | -0.94289 | -0.36171 | 2.532517 |

**Cartesian coordinates of 2 (B3LYP-D3(BJ)/def2-SVP, MCH, PCM model) in S<sub>1</sub> state**

$E = -2986.027227$  Hartrees

| Symbol | X        | Y        | Z        |
|--------|----------|----------|----------|
| C      | 0.740035 | -1.07704 | -0.18593 |
| N      | -1.66449 | -0.98085 | 0.069054 |
| S      | -2.33731 | 1.515506 | 0.058283 |
| O      | -4.29052 | 3.461427 | 0.119837 |
| B      | -0.4983  | -2.13017 | -0.03044 |
| C      | -5.41565 | 2.986318 | 0.131326 |
| S      | 1.502499 | 1.46312  | -0.05596 |

|   |          |          |          |
|---|----------|----------|----------|
| O | -7.95995 | 0.45461  | 0.149075 |
| C | -6.69414 | 3.761136 | 0.155543 |
| C | -6.88283 | 5.140874 | 0.168956 |
| H | -6.02507 | 5.816294 | 0.1618   |
| C | -8.19764 | 5.621062 | 0.191525 |
| H | -8.38108 | 6.697961 | 0.202474 |
| C | -9.29016 | 4.737136 | 0.200294 |
| H | -10.3048 | 5.141658 | 0.217885 |
| C | -9.09548 | 3.350707 | 0.18673  |
| H | -9.93558 | 2.653358 | 0.193166 |
| C | -7.78618 | 2.87755  | 0.164301 |
| C | -7.28647 | 1.467855 | 0.146123 |
| C | -5.79899 | 1.559258 | 0.124319 |
| C | -3.00889 | -0.98979 | 0.062658 |
| H | -3.55109 | -1.93356 | 0.048889 |
| C | -3.60606 | 0.264265 | 0.077029 |
| C | -5.01701 | 0.442265 | 0.100838 |
| H | -5.57974 | -0.50028 | 0.099763 |
| C | -1.14256 | 0.271581 | 0.026634 |
| C | 0.263296 | 0.24036  | -0.0687  |
| C | 2.153315 | -1.07534 | -0.22589 |
| H | 2.775368 | -1.96863 | -0.28852 |
| C | 2.714709 | 0.198461 | -0.18199 |
| C | 4.116132 | 0.524686 | -0.22503 |
| H | 4.819472 | -0.31635 | -0.28762 |
| C | -1.03389 | -3.07541 | -1.25155 |
| C | -0.70926 | -2.82735 | -2.61229 |
| C | -1.22395 | -3.64258 | -3.62903 |
| H | -0.94846 | -3.42834 | -4.66647 |
| C | -2.08863 | -4.70863 | -3.36383 |
| C | -2.44492 | -4.92286 | -2.03247 |
| H | -3.14131 | -5.73274 | -1.79366 |
| C | -1.94189 | -4.13398 | -0.98416 |
| C | 0.183044 | -1.68473 | -3.04291 |
| C | -2.60859 | -5.5855  | -4.47474 |
| C | -2.41221 | -4.50634 | 0.408456 |
| C | -0.11323 | -2.89506 | 1.369782 |
| C | 0.779655 | -3.99798 | 1.265734 |
| C | 1.202229 | -4.68412 | 2.411812 |
| H | 1.884575 | -5.53231 | 2.294834 |
| C | 0.783917 | -4.32137 | 3.694684 |
| C | -0.05594 | -3.21177 | 3.797596 |
| H | -0.37677 | -2.88084 | 4.79016  |
| C | -0.49499 | -2.49184 | 2.674739 |
| C | -1.36672 | -1.28689 | 2.953955 |
| C | 1.299923 | -4.51761 | -0.05895 |

|   |          |          |          |
|---|----------|----------|----------|
| C | 1.218067 | -5.10055 | 4.910293 |
| N | 4.490956 | 1.762571 | -0.18558 |
| N | 5.778312 | 2.110476 | -0.2143  |
| C | 6.814042 | 1.119093 | -0.28224 |
| C | 8.787209 | -0.84459 | -0.41489 |
| C | 7.323684 | 0.568821 | 0.898109 |
| C | 7.280964 | 0.689862 | -1.52859 |
| C | 8.271478 | -0.29299 | -1.59207 |
| C | 8.313354 | -0.41439 | 0.828653 |
| C | 6.093225 | 3.486835 | -0.17767 |
| C | 6.735202 | 6.225647 | -0.1051  |
| C | 7.43668  | 3.901948 | -0.18773 |
| C | 5.071733 | 4.453358 | -0.13074 |
| C | 5.399808 | 5.807188 | -0.0948  |
| C | 7.745953 | 5.262831 | -0.15179 |
| H | 8.238121 | 3.164723 | -0.22303 |
| H | 8.794952 | 5.568778 | -0.16007 |
| H | 6.983199 | 7.288689 | -0.07708 |
| H | 4.595821 | 6.54657  | -0.05852 |
| H | 4.033883 | 4.126396 | -0.123   |
| H | 6.942451 | 0.918498 | 1.859373 |
| H | 8.716547 | -0.84451 | 1.748046 |
| H | 9.561924 | -1.61287 | -0.46673 |
| H | 8.64219  | -0.62823 | -2.56322 |
| H | 6.867215 | 1.133332 | -2.43623 |
| H | 0.23895  | -1.63002 | -4.13991 |
| H | 1.20914  | -1.79312 | -2.66139 |
| H | -0.18098 | -0.71315 | -2.67825 |
| H | 1.507133 | -3.72319 | -0.78559 |
| H | 0.568726 | -5.18303 | -0.54447 |
| H | -3.34178 | -5.09251 | 0.352375 |
| H | -2.59508 | -3.64077 | 1.057268 |
| H | -3.4613  | -6.19618 | -4.1422  |
| H | -1.8269  | -6.27663 | -4.83529 |
| H | -2.93246 | -4.98825 | -5.3422  |
| H | -1.6642  | -5.1164  | 0.938359 |
| H | 2.225554 | -5.09302 | 0.092928 |
| H | 0.602521 | -6.00762 | 5.043546 |
| H | 2.264804 | -5.43274 | 4.824565 |
| H | 1.122398 | -4.5025  | 5.829222 |
| H | -1.46956 | -1.13307 | 4.037465 |
| H | -2.38319 | -1.39634 | 2.546106 |
| H | -0.9452  | -0.36235 | 2.532601 |

**Cartesian coordinates of 2 (B3LYP-D3(BJ)/def2-SVP, toluene, PCM model) in S<sub>1</sub> state**

E = -2986.029243 Hartrees

| Symbol | X        | Y        | Z        |
|--------|----------|----------|----------|
| C      | 0.740218 | -1.07706 | -0.18511 |
| N      | -1.66454 | -0.98093 | 0.068945 |
| S      | -2.33729 | 1.515322 | 0.058879 |
| O      | -4.29158 | 3.461775 | 0.119503 |
| B      | -0.49838 | -2.1301  | -0.03026 |
| C      | -5.41671 | 2.986191 | 0.131118 |
| S      | 1.502713 | 1.462989 | -0.05561 |
| O      | -7.95975 | 0.453382 | 0.149629 |
| C      | -6.69532 | 3.76052  | 0.154996 |
| C      | -6.88468 | 5.140168 | 0.167856 |
| H      | -6.02755 | 5.816366 | 0.160458 |
| C      | -8.19976 | 5.619792 | 0.190189 |
| H      | -8.38365 | 6.696588 | 0.200697 |
| C      | -9.29188 | 4.735383 | 0.199272 |
| H      | -10.3067 | 5.139406 | 0.216665 |
| C      | -9.09656 | 3.34898  | 0.18626  |
| H      | -9.9367  | 2.651702 | 0.192943 |
| C      | -7.78704 | 2.876381 | 0.164061 |
| C      | -7.28654 | 1.467188 | 0.146388 |
| C      | -5.79929 | 1.558993 | 0.124588 |
| C      | -3.00894 | -0.98991 | 0.062774 |
| H      | -3.55149 | -1.93347 | 0.049321 |
| C      | -3.60607 | 0.264209 | 0.077363 |
| C      | -5.01693 | 0.442109 | 0.101304 |
| H      | -5.57911 | -0.5007  | 0.10046  |
| C      | -1.14248 | 0.271562 | 0.026957 |
| C      | 0.263373 | 0.240322 | -0.06803 |
| C      | 2.153489 | -1.07555 | -0.22514 |
| H      | 2.775758 | -1.96867 | -0.28821 |
| C      | 2.715014 | 0.198276 | -0.18141 |
| C      | 4.116365 | 0.524566 | -0.22453 |
| H      | 4.819912 | -0.31622 | -0.28702 |
| C      | -1.03259 | -3.07517 | -1.25235 |
| C      | -0.70715 | -2.8261  | -2.61279 |
| C      | -1.22021 | -3.64139 | -3.63044 |
| H      | -0.94411 | -3.4263  | -4.66755 |
| C      | -2.08403 | -4.70854 | -3.36653 |
| C      | -2.44126 | -4.9237  | -2.03551 |
| H      | -3.13717 | -5.7343  | -1.79765 |
| C      | -1.93989 | -4.13474 | -0.98638 |
| C      | 0.184208 | -1.68231 | -3.04237 |
| C      | -2.60204 | -5.58558 | -4.47826 |
| C      | -2.41134 | -4.50806 | 0.405574 |

|   |          |          |          |
|---|----------|----------|----------|
| C | -0.11431 | -2.89536 | 1.37019  |
| C | 0.779426 | -3.99775 | 1.266851 |
| C | 1.201768 | -4.68368 | 2.413192 |
| H | 1.884863 | -5.53134 | 2.296634 |
| C | 0.782303 | -4.3213  | 3.69589  |
| C | -0.05864 | -3.21241 | 3.798172 |
| H | -0.38055 | -2.88184 | 4.790509 |
| C | -0.4975  | -2.49268 | 2.674949 |
| C | -1.37076 | -1.28874 | 2.953873 |
| C | 1.300927 | -4.51709 | -0.05746 |
| C | 1.216701 | -5.10003 | 4.911743 |
| N | 4.490722 | 1.762709 | -0.18524 |
| N | 5.7779   | 2.11084  | -0.21396 |
| C | 6.81408  | 1.119644 | -0.28154 |
| C | 8.78817  | -0.84293 | -0.41334 |
| C | 7.323968 | 0.570344 | 0.899156 |
| C | 7.280993 | 0.690151 | -1.52779 |
| C | 8.272044 | -0.29223 | -1.59081 |
| C | 8.314188 | -0.41238 | 0.83008  |
| C | 6.092383 | 3.487199 | -0.17752 |
| C | 6.733886 | 6.226375 | -0.10533 |
| C | 7.435806 | 3.902665 | -0.18764 |
| C | 5.070733 | 4.453686 | -0.13075 |
| C | 5.398518 | 5.807663 | -0.09499 |
| C | 7.74484  | 5.263637 | -0.15188 |
| H | 8.237395 | 3.165612 | -0.22284 |
| H | 8.793794 | 5.569726 | -0.1602  |
| H | 6.981703 | 7.289466 | -0.07745 |
| H | 4.594377 | 6.546891 | -0.05884 |
| H | 4.032858 | 4.126787 | -0.123   |
| H | 6.942693 | 0.920173 | 1.860341 |
| H | 8.717678 | -0.8418  | 1.749658 |
| H | 9.563316 | -1.61079 | -0.46485 |
| H | 8.642841 | -0.62776 | -2.56181 |
| H | 6.866999 | 1.132794 | -2.43572 |
| H | 0.240291 | -1.62679 | -4.13931 |
| H | 1.210292 | -1.7901  | -2.66068 |
| H | -0.18085 | -0.7114  | -2.677   |
| H | 1.507601 | -3.72258 | -0.7841  |
| H | 0.570538 | -5.18348 | -0.54291 |
| H | -3.34039 | -5.09488 | 0.348286 |
| H | -2.59563 | -3.6428  | 1.05435  |
| H | -3.4561  | -6.1953  | -4.14747 |
| H | -1.82008 | -6.27767 | -4.8364  |
| H | -2.92299 | -4.98855 | -5.34694 |
| H | -1.66333 | -5.11788 | 0.935772 |

|   |          |          |          |
|---|----------|----------|----------|
| H | 2.227072 | -5.0915  | 0.094934 |
| H | 0.606871 | -6.01157 | 5.040531 |
| H | 2.265985 | -5.42505 | 4.829581 |
| H | 1.113215 | -4.50449 | 5.831426 |
| H | -1.47426 | -1.13519 | 4.037357 |
| H | -2.38688 | -1.39946 | 2.54555  |
| H | -0.95027 | -0.36364 | 2.532767 |

**Cartesian coordinates of 2 (B3LYP-D3(BJ)/def2-SVP, CHCl<sub>3</sub>, PCM model) in S<sub>1</sub> state**

$E = -2986.035951$  Hartrees

| Symbol | X        | Y        | Z        |
|--------|----------|----------|----------|
| C      | 0.740706 | -1.07728 | -0.18163 |
| N      | -1.66488 | -0.98127 | 0.068899 |
| S      | -2.33745 | 1.514518 | 0.06015  |
| O      | -4.29514 | 3.462786 | 0.118138 |
| B      | -0.49883 | -2.13003 | -0.02885 |
| C      | -5.42029 | 2.985671 | 0.129639 |
| S      | 1.503316 | 1.46237  | -0.0538  |
| O      | -7.95933 | 0.449399 | 0.148654 |
| C      | -6.69929 | 3.758452 | 0.152333 |
| C      | -6.89084 | 5.137803 | 0.163952 |
| H      | -6.03586 | 5.816654 | 0.156381 |
| C      | -8.20684 | 5.61556  | 0.185297 |
| H      | -8.39221 | 6.692002 | 0.194802 |
| C      | -9.29765 | 4.72957  | 0.194649 |
| H      | -10.313  | 5.131972 | 0.211254 |
| C      | -9.10019 | 3.343267 | 0.182885 |
| H      | -9.94043 | 2.646184 | 0.18981  |
| C      | -7.78995 | 2.872522 | 0.161655 |
| C      | -7.28696 | 1.464984 | 0.145214 |
| C      | -5.80045 | 1.558039 | 0.124042 |
| C      | -3.00935 | -0.99045 | 0.062946 |
| H      | -3.55295 | -1.93338 | 0.050718 |
| C      | -3.60628 | 0.263845 | 0.077685 |
| C      | -5.01689 | 0.441477 | 0.101594 |
| H      | -5.57735 | -0.50212 | 0.101343 |
| C      | -1.14244 | 0.271375 | 0.028219 |
| C      | 0.263523 | 0.240025 | -0.06516 |
| C      | 2.154015 | -1.07643 | -0.22194 |
| H      | 2.776998 | -1.96891 | -0.28682 |
| C      | 2.71596  | 0.197485 | -0.17888 |
| C      | 4.117091 | 0.524053 | -0.22271 |
| H      | 4.821313 | -0.31585 | -0.28564 |
| C      | -1.02818 | -3.07484 | -1.254   |
| C      | -0.69934 | -2.82317 | -2.61346 |
| C      | -1.2068  | -3.63901 | -3.63391 |

|   |          |          |          |
|---|----------|----------|----------|
| H | -0.92808 | -3.42182 | -4.66989 |
| C | -2.06836 | -4.70935 | -3.37414 |
| C | -2.42936 | -4.92685 | -2.04428 |
| H | -3.124   | -5.73944 | -1.80948 |
| C | -1.93352 | -4.13734 | -0.99259 |
| C | 0.189547 | -1.67612 | -3.03974 |
| C | -2.58024 | -5.58669 | -4.48859 |
| C | -2.40913 | -4.51328 | 0.39716  |
| C | -0.11815 | -2.89609 | 1.37262  |
| C | 0.778992 | -3.9965  | 1.272009 |
| C | 1.200886 | -4.68112 | 2.419376 |
| H | 1.886874 | -5.52668 | 2.304527 |
| C | 0.777356 | -4.31968 | 3.701472 |
| C | -0.06806 | -3.21386 | 3.801251 |
| H | -0.39418 | -2.88472 | 4.792682 |
| C | -0.50654 | -2.49522 | 2.676485 |
| C | -1.38605 | -1.29539 | 2.954109 |
| C | 1.304654 | -4.51517 | -0.05091 |
| C | 1.214904 | -5.09557 | 4.918151 |
| N | 4.489828 | 1.763045 | -0.18371 |
| N | 5.776454 | 2.112082 | -0.2132  |
| C | 6.814152 | 1.121695 | -0.28125 |
| C | 8.79158  | -0.83678 | -0.41353 |
| C | 7.327446 | 0.576189 | 0.89972  |
| C | 7.27861  | 0.69092  | -1.52797 |
| C | 8.271536 | -0.28969 | -1.59113 |
| C | 8.319641 | -0.40465 | 0.830267 |
| C | 6.08938  | 3.488417 | -0.17625 |
| C | 6.729079 | 6.228863 | -0.10302 |
| C | 7.432615 | 3.905302 | -0.18879 |
| C | 5.067172 | 4.454612 | -0.1266  |
| C | 5.393877 | 5.809099 | -0.0904  |
| C | 7.740744 | 5.266574 | -0.1525  |
| H | 8.234764 | 3.169037 | -0.22641 |
| H | 8.789494 | 5.573255 | -0.16275 |
| H | 6.976213 | 7.292109 | -0.07473 |
| H | 4.589206 | 6.547655 | -0.05203 |
| H | 4.02926  | 4.127818 | -0.11712 |
| H | 6.947936 | 0.926822 | 1.861283 |
| H | 8.726155 | -0.83123 | 1.749788 |
| H | 9.568242 | -1.60306 | -0.46528 |
| H | 8.640649 | -0.6265  | -2.56228 |
| H | 6.861806 | 1.130295 | -2.43616 |
| H | 0.246628 | -1.6184  | -4.13651 |
| H | 1.215412 | -1.78232 | -2.6571  |
| H | -0.17863 | -0.70713 | -2.67253 |

|   |          |          |          |
|---|----------|----------|----------|
| H | 1.508974 | -3.7206  | -0.778   |
| H | 0.577198 | -5.18547 | -0.53553 |
| H | -3.33679 | -5.10173 | 0.335866 |
| H | -2.59781 | -3.6489  | 1.045658 |
| H | -3.43364 | -6.19914 | -4.16122 |
| H | -1.79512 | -6.27615 | -4.84481 |
| H | -2.89929 | -4.98968 | -5.35794 |
| H | -1.66145 | -5.12274 | 0.92835  |
| H | 2.232839 | -5.08564 | 0.103272 |
| H | 0.647155 | -6.03744 | 5.016291 |
| H | 2.280518 | -5.36925 | 4.860647 |
| H | 1.0581   | -4.51961 | 5.842565 |
| H | -1.4921  | -1.14274 | 4.037462 |
| H | -2.40078 | -1.41136 | 2.544009 |
| H | -0.96985 | -0.36806 | 2.53379  |

**Cartesian coordinates of 2 (B3LYP-D3(BJ)/def2-SVP, THF, PCM model) in S<sub>1</sub> state**

$E = -2986.038906$  Hartrees

| Symbol | X        | Y        | Z        |
|--------|----------|----------|----------|
| C      | 0.740948 | -1.07743 | -0.17938 |
| N      | -1.66504 | -0.98136 | 0.069156 |
| S      | -2.33746 | 1.514198 | 0.060277 |
| O      | -4.2965  | 3.463345 | 0.116945 |
| B      | -0.49907 | -2.13    | -0.02771 |
| C      | -5.42169 | 2.985635 | 0.127942 |
| S      | 1.503733 | 1.461955 | -0.05207 |
| O      | -7.95918 | 0.448046 | 0.14575  |
| C      | -6.70081 | 3.757827 | 0.149821 |
| C      | -6.89327 | 5.137056 | 0.161111 |
| H      | -6.03924 | 5.817077 | 0.153931 |
| C      | -8.20968 | 5.61404  | 0.181636 |
| H      | -8.39566 | 6.690326 | 0.190862 |
| C      | -9.29995 | 4.727406 | 0.190518 |
| H      | -10.3155 | 5.129149 | 0.206491 |
| C      | -9.1016  | 3.341147 | 0.179092 |
| H      | -9.94189 | 2.64415  | 0.18568  |
| C      | -7.79105 | 2.871175 | 0.158682 |
| C      | -7.28707 | 1.464333 | 0.142709 |
| C      | -5.80087 | 1.557839 | 0.122405 |
| C      | -3.00957 | -0.9906  | 0.062819 |
| H      | -3.55364 | -1.93324 | 0.051156 |
| C      | -3.60634 | 0.263787 | 0.077197 |
| C      | -5.01688 | 0.441375 | 0.100609 |
| H      | -5.57668 | -0.50251 | 0.100474 |
| C      | -1.14241 | 0.27131  | 0.029056 |
| C      | 0.263682 | 0.239825 | -0.06318 |

|   |          |          |          |
|---|----------|----------|----------|
| C | 2.154316 | -1.07696 | -0.21974 |
| H | 2.777569 | -1.96917 | -0.28565 |
| C | 2.716502 | 0.196946 | -0.17688 |
| C | 4.117563 | 0.523634 | -0.22123 |
| H | 4.822058 | -0.31586 | -0.2851  |
| C | -1.02613 | -3.07469 | -1.25425 |
| C | -0.69502 | -2.82241 | -2.61324 |
| C | -1.19979 | -3.63859 | -3.63489 |
| H | -0.91926 | -3.42099 | -4.67029 |
| C | -2.06103 | -4.70988 | -3.37701 |
| C | -2.42437 | -4.92791 | -2.04779 |
| H | -3.11881 | -5.74106 | -1.81443 |
| C | -1.93109 | -4.13804 | -0.99495 |
| C | 0.193578 | -1.6745  | -3.03793 |
| C | -2.57064 | -5.58675 | -4.49294 |
| C | -2.40912 | -4.51481 | 0.393714 |
| C | -0.12018 | -2.89656 | 1.374237 |
| C | 0.778346 | -3.99617 | 1.274923 |
| C | 1.1998   | -4.68033 | 2.422806 |
| H | 1.887041 | -5.52499 | 2.308798 |
| C | 0.77424  | -4.31939 | 3.704562 |
| C | -0.07314 | -3.21487 | 3.803163 |
| H | -0.40131 | -2.88644 | 4.794149 |
| C | -0.51109 | -2.49653 | 2.677699 |
| C | -1.39337 | -1.29851 | 2.9546   |
| C | 1.306081 | -4.51455 | -0.04729 |
| C | 1.212686 | -5.09411 | 4.921717 |
| N | 4.48956  | 1.762981 | -0.18188 |
| N | 5.775946 | 2.11253  | -0.2122  |
| C | 6.814325 | 1.122649 | -0.28209 |
| C | 8.79336  | -0.83369 | -0.41778 |
| C | 7.331015 | 0.578778 | 0.898146 |
| C | 7.275892 | 0.691475 | -1.52975 |
| C | 8.269686 | -0.2882  | -1.59458 |
| C | 8.324158 | -0.40104 | 0.826934 |
| C | 6.088099 | 3.488836 | -0.17387 |
| C | 6.726834 | 6.229852 | -0.09787 |
| C | 7.43118  | 3.906529 | -0.18916 |
| C | 5.06563  | 4.454745 | -0.12011 |
| C | 5.391776 | 5.809457 | -0.0826  |
| C | 7.738829 | 5.267923 | -0.15146 |
| H | 8.233608 | 3.170773 | -0.23009 |
| H | 8.787439 | 5.574972 | -0.16392 |
| H | 6.973606 | 7.293153 | -0.0685  |
| H | 4.586863 | 6.547585 | -0.04105 |
| H | 4.027745 | 4.127899 | -0.10857 |

|   |          |          |          |
|---|----------|----------|----------|
| H | 6.953703 | 0.929629 | 1.860482 |
| H | 8.733492 | -0.82637 | 1.745764 |
| H | 9.570733 | -1.59914 | -0.47091 |
| H | 8.636605 | -0.62544 | -2.56638 |
| H | 6.856389 | 1.129395 | -2.43739 |
| H | 0.251564 | -1.61605 | -4.1346  |
| H | 1.219139 | -1.78054 | -2.65446 |
| H | -0.17559 | -0.70609 | -2.67021 |
| H | 1.509363 | -3.72001 | -0.77462 |
| H | 0.580061 | -5.18676 | -0.53149 |
| H | -3.33672 | -5.10306 | 0.330457 |
| H | -2.59897 | -3.65076 | 1.042203 |
| H | -3.41629 | -6.20889 | -4.16385 |
| H | -1.78087 | -6.26657 | -4.85717 |
| H | -2.9001  | -4.98853 | -5.35761 |
| H | -1.66222 | -5.12499 | 0.925247 |
| H | 2.235218 | -5.08313 | 0.107834 |
| H | 0.660213 | -6.04599 | 5.009335 |
| H | 2.283253 | -5.34981 | 4.873224 |
| H | 1.037316 | -4.5255  | 5.847282 |
| H | -1.5007  | -1.14623 | 4.037872 |
| H | -2.40742 | -1.41683 | 2.543588 |
| H | -0.97907 | -0.37021 | 2.534611 |

**Cartesian coordinates of 2 (B3LYP-D3(BJ)/def2-SVP, CH<sub>2</sub>Cl<sub>2</sub>, PCM model) in S<sub>1</sub> state**

*E* = -2986.039833 Hartrees

| Symbol | X        | Y        | Z        |
|--------|----------|----------|----------|
| C      | 0.741013 | -1.0775  | -0.1786  |
| N      | -1.66507 | -0.98136 | 0.069548 |
| S      | -2.33743 | 1.514119 | 0.060453 |
| O      | -4.29686 | 3.46356  | 0.116793 |
| B      | -0.49915 | -2.12998 | -0.0271  |
| C      | -5.42206 | 2.985682 | 0.127769 |
| S      | 1.503896 | 1.461804 | -0.05163 |
| O      | -7.95911 | 0.447725 | 0.145544 |
| C      | -6.70121 | 3.75771  | 0.149486 |
| C      | -6.89394 | 5.136905 | 0.160638 |
| H      | -6.0402  | 5.817287 | 0.153474 |
| C      | -8.21046 | 5.613661 | 0.181014 |
| H      | -8.39663 | 6.689899 | 0.19013  |
| C      | -9.30058 | 4.726839 | 0.189887 |
| H      | -10.3162 | 5.12839  | 0.205744 |
| C      | -9.10196 | 3.340592 | 0.178603 |
| H      | -9.94227 | 2.643624 | 0.185191 |
| C      | -7.79133 | 2.870848 | 0.158344 |
| C      | -7.28707 | 1.464216 | 0.142529 |

|   |          |          |          |
|---|----------|----------|----------|
| C | -5.80096 | 1.557839 | 0.122357 |
| C | -3.00963 | -0.99062 | 0.063194 |
| H | -3.55385 | -1.93316 | 0.05184  |
| C | -3.60634 | 0.263807 | 0.077399 |
| C | -5.01685 | 0.441397 | 0.10077  |
| H | -5.57645 | -0.50257 | 0.100794 |
| C | -1.14239 | 0.271304 | 0.029494 |
| C | 0.26375  | 0.239754 | -0.06248 |
| C | 2.1544   | -1.07716 | -0.21915 |
| H | 2.777721 | -1.96929 | -0.28546 |
| C | 2.71668  | 0.196738 | -0.17648 |
| C | 4.117719 | 0.523454 | -0.22122 |
| H | 4.822283 | -0.31592 | -0.2856  |
| C | -1.02564 | -3.07469 | -1.25397 |
| C | -0.69386 | -2.82235 | -2.61287 |
| C | -1.1979  | -3.63871 | -3.63478 |
| H | -0.91681 | -3.42111 | -4.67004 |
| C | -2.05913 | -4.71019 | -3.37735 |
| C | -2.42314 | -4.92824 | -2.04831 |
| H | -3.11757 | -5.7415  | -1.81528 |
| C | -1.93055 | -4.1382  | -0.9952  |
| C | 0.194735 | -1.6743  | -3.0372  |
| C | -2.56827 | -5.58686 | -4.49368 |
| C | -2.40925 | -4.51511 | 0.39319  |
| C | -0.12071 | -2.89668 | 1.374974 |
| C | 0.778191 | -3.99607 | 1.276009 |
| C | 1.199578 | -4.6801  | 2.424035 |
| H | 1.887168 | -5.5245  | 2.310249 |
| C | 0.7735   | -4.31928 | 3.705711 |
| C | -0.07443 | -3.21511 | 3.803999 |
| H | -0.40315 | -2.88687 | 4.794866 |
| C | -0.51227 | -2.49686 | 2.678343 |
| C | -1.39533 | -1.29936 | 2.955059 |
| C | 1.306447 | -4.51442 | -0.04602 |
| C | 1.212217 | -5.09366 | 4.923002 |
| N | 4.489492 | 1.762909 | -0.18176 |
| N | 5.775798 | 2.112631 | -0.21261 |
| C | 6.814376 | 1.122927 | -0.28351 |
| C | 8.793898 | -0.83271 | -0.42109 |
| C | 7.332647 | 0.579593 | 0.896282 |
| C | 7.274515 | 0.691619 | -1.53165 |
| C | 8.268569 | -0.28774 | -1.59741 |
| C | 8.32608  | -0.39988 | 0.824108 |
| C | 6.087708 | 3.488922 | -0.17369 |
| C | 6.72614  | 6.230111 | -0.09651 |
| C | 7.430726 | 3.906894 | -0.19037 |

|   |          |          |          |
|---|----------|----------|----------|
| C | 5.065172 | 4.454716 | -0.11797 |
| C | 5.391142 | 5.809496 | -0.0799  |
| C | 7.738224 | 5.268322 | -0.15206 |
| H | 8.233232 | 3.171323 | -0.23288 |
| H | 8.786779 | 5.575501 | -0.16563 |
| H | 6.972799 | 7.293425 | -0.06668 |
| H | 4.586165 | 6.547469 | -0.03683 |
| H | 4.027305 | 4.127841 | -0.10539 |
| H | 6.95643  | 0.930519 | 1.859016 |
| H | 8.736703 | -0.82479 | 1.742549 |
| H | 9.571486 | -1.59788 | -0.47497 |
| H | 8.634388 | -0.62513 | -2.56958 |
| H | 6.853771 | 1.129058 | -2.43894 |
| H | 0.252942 | -1.61572 | -4.13385 |
| H | 1.220215 | -1.78038 | -2.65353 |
| H | -0.17463 | -0.70601 | -2.66938 |
| H | 1.509355 | -3.71992 | -0.77347 |
| H | 0.580822 | -5.18725 | -0.52999 |
| H | -3.33695 | -5.10312 | 0.329428 |
| H | -2.59922 | -3.65112 | 1.041691 |
| H | -3.41024 | -6.21332 | -4.16343 |
| H | -1.77663 | -6.26232 | -4.86188 |
| H | -2.90286 | -4.98815 | -5.35606 |
| H | -1.66264 | -5.12567 | 0.924737 |
| H | 2.235886 | -5.08242 | 0.10934  |
| H | 0.663645 | -6.04801 | 5.008034 |
| H | 2.283963 | -5.34485 | 4.876753 |
| H | 1.032219 | -4.52692 | 5.848808 |
| H | -1.50293 | -1.14713 | 4.038309 |
| H | -2.40922 | -1.4184  | 2.543889 |
| H | -0.98165 | -0.37079 | 2.535065 |

**Cartesian coordinates of 2 (B3LYP-D3(BJ)/def2-SVP, acetone, PCM model) in S<sub>1</sub> state**

$E = -2986.043563$  Hartrees

| Symbol | X         | Y        | Z        |
|--------|-----------|----------|----------|
| C      | 0.741299  | -1.07774 | -0.17573 |
| N      | -1.665162 | -0.9813  | 0.070546 |
| S      | -2.337203 | 1.513959 | 0.06026  |
| O      | -4.297673 | 3.464355 | 0.115039 |
| B      | -0.499399 | -2.12993 | -0.02514 |
| C      | -5.422959 | 2.986052 | 0.125467 |
| S      | 1.504581  | 1.46122  | -0.04938 |
| O      | -7.958876 | 0.447166 | 0.141797 |
| C      | -6.702147 | 3.75767  | 0.146262 |
| C      | -6.895631 | 5.13677  | 0.157085 |
| H      | -6.04273  | 5.8182   | 0.150415 |

|   |            |          |          |
|---|------------|----------|----------|
| C | -8.212491  | 5.612904 | 0.176515 |
| H | -8.399152  | 6.689008 | 0.185356 |
| C | -9.302192  | 4.725576 | 0.18479  |
| H | -10.317999 | 5.126605 | 0.199921 |
| C | -9.102835  | 3.339361 | 0.173848 |
| H | -9.94321   | 2.642497 | 0.180003 |
| C | -7.791962  | 2.870242 | 0.154547 |
| C | -7.28695   | 1.464205 | 0.139274 |
| C | -5.801093  | 1.55809  | 0.12015  |
| C | -3.009815  | -0.99053 | 0.063559 |
| H | -3.554515  | -1.93278 | 0.052995 |
| C | -3.606252  | 0.264016 | 0.076871 |
| C | -5.016708  | 0.441676 | 0.099519 |
| H | -5.575799  | -0.5025  | 0.0998   |
| C | -1.142241  | 0.271311 | 0.030762 |
| C | 0.264092   | 0.239482 | -0.0599  |
| C | 2.154773   | -1.0779  | -0.21654 |
| H | 2.778266   | -1.96979 | -0.28409 |
| C | 2.717389   | 0.195937 | -0.1742  |
| C | 4.118387   | 0.522724 | -0.21996 |
| H | 4.823153   | -0.31624 | -0.28629 |
| C | -1.02391   | -3.0746  | -1.25315 |
| C | -0.68946   | -2.82243 | -2.61162 |
| C | -1.191136  | -3.63927 | -3.63445 |
| H | -0.907856  | -3.42194 | -4.66917 |
| C | -2.052839  | -4.71098 | -3.37858 |
| C | -2.419552  | -4.92876 | -2.05016 |
| H | -3.114351  | -5.74204 | -1.81834 |
| C | -1.929128  | -4.13827 | -0.99615 |
| C | 0.19975    | -1.67433 | -3.03465 |
| C | -2.560378  | -5.58705 | -4.49615 |
| C | -2.410493  | -4.51534 | 0.391252 |
| C | -0.122771  | -2.8972  | 1.377374 |
| C | 0.77707    | -3.99612 | 1.279617 |
| C | 1.197787   | -4.67992 | 2.428148 |
| H | 1.886324   | -5.52365 | 2.315166 |
| C | 0.769776   | -4.31953 | 3.70948  |
| C | -0.079674  | -3.2163  | 3.80668  |
| H | -0.410337  | -2.88872 | 4.79712  |
| C | -0.516634  | -2.49808 | 2.680392 |
| C | -1.401987  | -1.30205 | 2.95635  |
| C | 1.307222   | -4.51433 | -0.04172 |
| C | 1.208672   | -5.09316 | 4.927244 |
| N | 4.489462   | 1.762487 | -0.17963 |
| N | 5.775514   | 2.112824 | -0.2121  |
| C | 6.814715   | 1.123777 | -0.28716 |

|   |           |          |          |
|---|-----------|----------|----------|
| C | 8.795788  | -0.82948 | -0.43266 |
| C | 7.338865  | 0.581843 | 0.890671 |
| C | 7.269486  | 0.692391 | -1.53724 |
| C | 8.264349  | -0.28592 | -1.60695 |
| C | 8.333221  | -0.39645 | 0.814482 |
| C | 6.086628  | 3.489054 | -0.17029 |
| C | 6.724015  | 6.230733 | -0.08728 |
| C | 7.429385  | 3.908014 | -0.1922  |
| C | 5.063894  | 4.454342 | -0.10642 |
| C | 5.389268  | 5.80931  | -0.06559 |
| C | 7.736363  | 5.269524 | -0.15094 |
| H | 8.232129  | 3.173136 | -0.2412  |
| H | 8.784701  | 5.577201 | -0.16871 |
| H | 6.970285  | 7.294069 | -0.05518 |
| H | 4.584105  | 6.546688 | -0.0162  |
| H | 4.026133  | 4.127271 | -0.08984 |
| H | 6.966787  | 0.932745 | 1.855009 |
| H | 8.748603  | -0.82026 | 1.731272 |
| H | 9.57405   | -1.59372 | -0.4897  |
| H | 8.626004  | -0.62348 | -2.58058 |
| H | 6.844145  | 1.128538 | -2.44299 |
| H | 0.259091  | -1.61549 | -4.13122 |
| H | 1.224788  | -1.78092 | -2.64996 |
| H | -0.169967 | -0.70623 | -2.66675 |
| H | 1.509401  | -3.71994 | -0.76942 |
| H | 0.58282   | -5.18886 | -0.52526 |
| H | -3.338889 | -5.10197 | 0.325714 |
| H | -2.600404 | -3.65147 | 1.039823 |
| H | -3.392425 | -6.22514 | -4.16315 |
| H | -1.763753 | -6.25061 | -4.87491 |
| H | -2.908552 | -4.98713 | -5.35235 |
| H | -1.665332 | -5.12761 | 0.922939 |
| H | 2.237414  | -5.08075 | 0.114587 |
| H | 0.670599  | -6.05403 | 5.005014 |
| H | 2.283458  | -5.33228 | 4.887455 |
| H | 1.015909  | -4.53164 | 5.853615 |
| H | -1.510672 | -1.14998 | 4.039508 |
| H | -2.415295 | -1.42318 | 2.544445 |
| H | -0.990022 | -0.37271 | 2.536438 |

**Cartesian coordinates of 2 (B3LYP-D3(BJ)/def2-SVP, EtOH, PCM model) in S<sub>1</sub> state**

$E = -2986.042985$  Hartrees

| Symbol | X        | Y        | Z        |
|--------|----------|----------|----------|
| C      | 0.741348 | -1.07779 | -0.17526 |
| N      | -1.66517 | -0.98128 | 0.070738 |
| S      | -2.33715 | 1.513952 | 0.060175 |

|   |          |          |          |
|---|----------|----------|----------|
| O | -4.29775 | 3.464499 | 0.114675 |
| B | -0.49944 | -2.12992 | -0.02479 |
| C | -5.42305 | 2.986146 | 0.125023 |
| S | 1.504709 | 1.461121 | -0.04902 |
| O | -7.95883 | 0.447152 | 0.141146 |
| C | -6.70224 | 3.757717 | 0.145668 |
| C | -6.89582 | 5.136806 | 0.156429 |
| H | -6.04303 | 5.818382 | 0.149833 |
| C | -8.21272 | 5.61286  | 0.175706 |
| H | -8.39945 | 6.688946 | 0.184496 |
| C | -9.30237 | 4.725468 | 0.183892 |
| H | -10.3182 | 5.126431 | 0.198904 |
| C | -9.10292 | 3.339257 | 0.173013 |
| H | -9.94331 | 2.64241  | 0.179103 |
| C | -7.79201 | 2.870218 | 0.153868 |
| C | -7.28691 | 1.464261 | 0.138694 |
| C | -5.80109 | 1.558169 | 0.119736 |
| C | -3.00984 | -0.9905  | 0.063633 |
| H | -3.55461 | -1.9327  | 0.053208 |
| C | -3.60622 | 0.264074 | 0.076762 |
| C | -5.01667 | 0.441754 | 0.09928  |
| H | -5.5757  | -0.50244 | 0.099616 |
| C | -1.14221 | 0.27132  | 0.030964 |
| C | 0.264161 | 0.239437 | -0.05948 |
| C | 2.154838 | -1.07802 | -0.21611 |
| H | 2.778349 | -1.96988 | -0.28385 |
| C | 2.717512 | 0.195796 | -0.17383 |
| C | 4.118506 | 0.522588 | -0.21977 |
| H | 4.823296 | -0.31631 | -0.28647 |
| C | -1.02367 | -3.0746  | -1.25295 |
| C | -0.68878 | -2.82252 | -2.61136 |
| C | -1.19013 | -3.63944 | -3.6343  |
| H | -0.90649 | -3.42221 | -4.66894 |
| C | -2.05198 | -4.71113 | -3.37863 |
| C | -2.41913 | -4.9288  | -2.05031 |
| H | -3.11403 | -5.74203 | -1.81865 |
| C | -1.929   | -4.13823 | -0.99618 |
| C | 0.200596 | -1.67448 | -3.03422 |
| C | -2.55934 | -5.58709 | -4.49638 |
| C | -2.41079 | -4.51526 | 0.391075 |
| C | -0.12309 | -2.89728 | 1.377792 |
| C | 0.776849 | -3.99615 | 1.280216 |
| C | 1.197434 | -4.67994 | 2.428826 |
| H | 1.886085 | -5.52359 | 2.315967 |
| C | 0.769134 | -4.31961 | 3.710101 |
| C | -0.0805  | -3.21648 | 3.807138 |

|   |          |          |          |
|---|----------|----------|----------|
| H | -0.41144 | -2.88899 | 4.797513 |
| C | -0.51729 | -2.49824 | 2.680759 |
| C | -1.40293 | -1.3024  | 2.956591 |
| C | 1.30728  | -4.51437 | -0.04101 |
| C | 1.207959 | -5.09317 | 4.927941 |
| N | 4.489482 | 1.762392 | -0.17926 |
| N | 5.775495 | 2.112827 | -0.21203 |
| C | 6.814781 | 1.123889 | -0.28789 |
| C | 8.796076 | -0.829   | -0.43494 |
| C | 7.340014 | 0.582154 | 0.889546 |
| C | 7.268543 | 0.692508 | -1.53834 |
| C | 8.263519 | -0.28563 | -1.60883 |
| C | 8.334504 | -0.39595 | 0.812577 |
| C | 6.086492 | 3.489044 | -0.16964 |
| C | 6.723724 | 6.230784 | -0.08547 |
| C | 7.429199 | 3.908165 | -0.19255 |
| C | 5.063739 | 4.454236 | -0.10418 |
| C | 5.389026 | 5.809227 | -0.0628  |
| C | 7.736101 | 5.269681 | -0.1507  |
| H | 8.231971 | 3.173407 | -0.24281 |
| H | 8.784399 | 5.577444 | -0.16928 |
| H | 6.969938 | 7.29412  | -0.05292 |
| H | 4.583843 | 6.546502 | -0.01218 |
| H | 4.026001 | 4.127124 | -0.08683 |
| H | 6.968717 | 0.93304  | 1.854189 |
| H | 8.750757 | -0.81961 | 1.729042 |
| H | 9.574434 | -1.59309 | -0.49259 |
| H | 8.624388 | -0.62321 | -2.58274 |
| H | 6.842359 | 1.12847  | -2.44378 |
| H | 0.260133 | -1.61564 | -4.13077 |
| H | 1.225554 | -1.7812  | -2.64935 |
| H | -0.16912 | -0.70637 | -2.66634 |
| H | 1.509388 | -3.72    | -0.76875 |
| H | 0.583042 | -5.18912 | -0.5245  |
| H | -3.33935 | -5.10158 | 0.325285 |
| H | -2.60059 | -3.65139 | 1.039659 |
| H | -3.38964 | -6.22715 | -4.16285 |
| H | -1.76191 | -6.2486  | -4.87701 |
| H | -2.90991 | -4.98697 | -5.35148 |
| H | -1.6659  | -5.12786 | 0.922773 |
| H | 2.237562 | -5.08058 | 0.115444 |
| H | 0.670795 | -6.0546  | 5.00504  |
| H | 2.282996 | -5.33126 | 4.888778 |
| H | 1.014021 | -4.53212 | 5.854341 |
| H | -1.51177 | -1.15033 | 4.039734 |
| H | -2.41616 | -1.42381 | 2.544588 |

H            -0.9912    -0.37296    2.536669

**Cartesian coordinates of 2 (B3LYP-D3(BJ)/def2-SVP, MeCN, PCM model) in S<sub>1</sub> state**

*E* = -2986.043559 Hartrees

| Symbol | X        | Y        | Z        |
|--------|----------|----------|----------|
| C      | 0.74142  | -1.07786 | -0.17454 |
| N      | -1.66518 | -0.98124 | 0.071045 |
| S      | -2.33706 | 1.513946 | 0.060022 |
| O      | -4.29784 | 3.464714 | 0.114086 |
| B      | -0.49949 | -2.1299  | -0.02424 |
| C      | -5.42317 | 2.986295 | 0.124322 |
| S      | 1.504901 | 1.460968 | -0.04848 |
| O      | -7.95876 | 0.447155 | 0.140153 |
| C      | -6.70235 | 3.757803 | 0.144737 |
| C      | -6.89607 | 5.136875 | 0.155398 |
| H      | -6.04345 | 5.818661 | 0.148908 |
| C      | -8.21304 | 5.612817 | 0.174444 |
| H      | -8.39986 | 6.688877 | 0.183153 |
| C      | -9.30262 | 4.725336 | 0.182502 |
| H      | -10.3185 | 5.126205 | 0.197337 |
| C      | -9.10303 | 3.339129 | 0.171727 |
| H      | -9.94343 | 2.642309 | 0.177724 |
| C      | -7.79208 | 2.870204 | 0.152816 |
| C      | -7.28685 | 1.464361 | 0.137798 |
| C      | -5.80107 | 1.558298 | 0.119092 |
| C      | -3.00987 | -0.99044 | 0.063756 |
| H      | -3.55476 | -1.93257 | 0.053548 |
| C      | -3.60618 | 0.264165 | 0.076591 |
| C      | -5.01662 | 0.441879 | 0.098909 |
| H      | -5.57555 | -0.50235 | 0.099338 |
| C      | -1.14215 | 0.271335 | 0.031271 |
| C      | 0.264265 | 0.239366 | -0.05885 |
| C      | 2.154933 | -1.07822 | -0.21548 |
| H      | 2.778469 | -1.97003 | -0.2835  |
| C      | 2.717695 | 0.19558  | -0.17328 |
| C      | 4.118685 | 0.522378 | -0.21951 |
| H      | 4.823508 | -0.31644 | -0.28678 |
| C      | -1.02334 | -3.0746  | -1.25261 |
| C      | -0.6878  | -2.82269 | -2.61093 |
| C      | -1.18869 | -3.63975 | -3.63402 |
| H      | -0.90451 | -3.4227  | -4.66855 |
| C      | -2.05076 | -4.71137 | -3.37863 |
| C      | -2.41856 | -4.92884 | -2.05044 |
| H      | -3.11363 | -5.74199 | -1.819   |
| C      | -1.92884 | -4.13815 | -0.99616 |
| C      | 0.201853 | -1.67478 | -3.03356 |

|   |          |          |          |
|---|----------|----------|----------|
| C | -2.55788 | -5.58719 | -4.49661 |
| C | -2.41126 | -4.5151  | 0.390899 |
| C | -0.12356 | -2.89739 | 1.378441 |
| C | 0.776526 | -3.99621 | 1.281131 |
| C | 1.196917 | -4.67997 | 2.429856 |
| H | 1.885725 | -5.52351 | 2.317179 |
| C | 0.7682   | -4.31972 | 3.711051 |
| C | -0.0817  | -3.21674 | 3.807847 |
| H | -0.41307 | -2.88938 | 4.798125 |
| C | -0.51823 | -2.49847 | 2.681328 |
| C | -1.40433 | -1.30291 | 2.956974 |
| C | 1.307346 | -4.51443 | -0.03994 |
| C | 1.206996 | -5.09314 | 4.928996 |
| N | 4.489516 | 1.762241 | -0.17871 |
| N | 5.775471 | 2.112823 | -0.21193 |
| C | 6.81488  | 1.124053 | -0.28908 |
| C | 8.796495 | -0.82828 | -0.43858 |
| C | 7.341803 | 0.582597 | 0.887731 |
| C | 7.26706  | 0.692696 | -1.54011 |
| C | 8.262198 | -0.2852  | -1.61182 |
| C | 8.336485 | -0.39522 | 0.809523 |
| C | 6.086297 | 3.489018 | -0.16862 |
| C | 6.723303 | 6.230844 | -0.08259 |
| C | 7.428925 | 3.908384 | -0.19311 |
| C | 5.063523 | 4.454059 | -0.10065 |
| C | 5.388681 | 5.809081 | -0.05838 |
| C | 7.735715 | 5.269908 | -0.15032 |
| H | 8.231732 | 3.17381  | -0.24537 |
| H | 8.78395  | 5.577801 | -0.17017 |
| H | 6.969433 | 7.294176 | -0.04932 |
| H | 4.583475 | 6.546195 | -0.00581 |
| H | 4.025824 | 4.126882 | -0.08207 |
| H | 6.971729 | 0.933448 | 1.852855 |
| H | 8.754094 | -0.81866 | 1.725472 |
| H | 9.574991 | -1.59215 | -0.4972  |
| H | 8.621833 | -0.62279 | -2.58618 |
| H | 6.839563 | 1.128394 | -2.44506 |
| H | 0.261679 | -1.61596 | -4.13009 |
| H | 1.22669  | -1.7817  | -2.64843 |
| H | -0.16785 | -0.70663 | -2.66574 |
| H | 1.509363 | -3.72011 | -0.76774 |
| H | 0.583334 | -5.18951 | -0.52334 |
| H | -3.34008 | -5.10094 | 0.324755 |
| H | -2.60086 | -3.65122 | 1.039496 |
| H | -3.38569 | -6.23007 | -4.16232 |
| H | -1.75933 | -6.24576 | -4.87993 |

|   |          |          |          |
|---|----------|----------|----------|
| H | -2.9119  | -4.98681 | -5.35013 |
| H | -1.66679 | -5.12821 | 0.922613 |
| H | 2.237751 | -5.08036 | 0.116733 |
| H | 0.672052 | -6.05592 | 5.004527 |
| H | 2.282646 | -5.3287  | 4.891245 |
| H | 1.010342 | -4.53323 | 5.855502 |
| H | -1.51338 | -1.15084 | 4.040092 |
| H | -2.41745 | -1.42476 | 2.544831 |
| H | -0.99296 | -0.37333 | 2.537028 |

**Cartesian coordinates of 3 (B3LYP-D3(BJ)/def2-SVP, *n*-hexane, PCM model) in S<sub>1</sub> state**

*E* = -2603.033566 Hartrees

| Symbol | X          | Y        | Z        |
|--------|------------|----------|----------|
| C      | 2.177937   | 0.329197 | -0.28587 |
| N      | -0.044671  | -0.56881 | 0.051604 |
| S      | -1.692732  | 1.424749 | -0.00661 |
| O      | -4.278371  | 2.387365 | 0.075838 |
| B      | 1.490311   | -1.13438 | -0.05201 |
| C      | -5.102765  | 1.488105 | 0.138042 |
| S      | 1.819404   | 2.961261 | -0.26644 |
| O      | -6.364718  | -1.86741 | 0.307712 |
| C      | -6.587522  | 1.663905 | 0.186577 |
| C      | -7.332596  | 2.840276 | 0.171538 |
| H      | -6.833762  | 3.810012 | 0.117783 |
| C      | -8.727398  | 2.732139 | 0.227231 |
| H      | -9.341796  | 3.635463 | 0.217173 |
| C      | -9.352889  | 1.475727 | 0.296207 |
| H      | -10.443311 | 1.423006 | 0.338619 |
| C      | -8.599231  | 0.295737 | 0.311178 |
| H      | -9.072091  | -0.68689 | 0.364602 |
| C      | -7.212721  | 0.408154 | 0.255448 |
| C      | -6.171885  | -0.66696 | 0.255776 |
| C      | -4.858986  | 0.032175 | 0.180503 |
| C      | -1.263075  | -1.13235 | 0.092517 |
| H      | -1.36525   | -2.21566 | 0.124766 |
| C      | -2.327789  | -0.23903 | 0.092046 |
| C      | -3.682815  | -0.66029 | 0.159326 |
| H      | -3.803599  | -1.75058 | 0.202059 |
| C      | -0.089002  | 0.786682 | -0.04632 |
| C      | 1.197685   | 1.334924 | -0.19202 |
| C      | 3.460107   | 0.913543 | -0.38127 |
| H      | 4.394704   | 0.355272 | -0.44069 |
| C      | 3.44513    | 2.30758  | -0.40015 |
| C      | 4.57926    | 3.185113 | -0.5141  |
| H      | 5.564469   | 2.705411 | -0.57515 |
| C      | 1.374882   | -2.27122 | -1.22124 |

|   |           |          |          |
|---|-----------|----------|----------|
| C | 1.537935  | -1.97115 | -2.60032 |
| C | 1.394766  | -2.97167 | -3.5707  |
| H | 1.534251  | -2.70813 | -4.62393 |
| C | 1.063884  | -4.289   | -3.23985 |
| C | 0.855329  | -4.57272 | -1.89034 |
| H | 0.567813  | -5.58817 | -1.60028 |
| C | 0.999936  | -3.59953 | -0.88716 |
| C | 1.85592   | -0.57952 | -3.09966 |
| H | 2.840813  | -0.23033 | -2.75612 |
| H | 1.125583  | 0.164081 | -2.7488  |
| H | 1.856952  | -0.55403 | -4.19921 |
| C | 0.939163  | -5.35165 | -4.30225 |
| H | 1.931194  | -5.65969 | -4.67599 |
| H | 0.368561  | -4.98773 | -5.17186 |
| H | 0.437431  | -6.25176 | -3.9166  |
| C | 0.753186  | -4.07112 | 0.53263  |
| H | 0.159406  | -4.99756 | 0.528293 |
| H | 0.229419  | -3.33515 | 1.155325 |
| H | 1.696875  | -4.28117 | 1.059396 |
| C | 2.18347   | -1.60924 | 1.358248 |
| C | 3.453219  | -2.24418 | 1.259316 |
| C | 4.142519  | -2.64449 | 2.411147 |
| H | 5.114227  | -3.13625 | 2.297905 |
| C | 3.632543  | -2.4362  | 3.695413 |
| C | 2.408251  | -1.77424 | 3.791458 |
| H | 1.994769  | -1.56724 | 4.783345 |
| C | 1.690056  | -1.34912 | 2.661818 |
| C | 0.398079  | -0.60934 | 2.932781 |
| H | -0.485513 | -1.1531  | 2.564974 |
| H | 0.383416  | 0.386844 | 2.466824 |
| H | 0.260319  | -0.46527 | 4.013804 |
| C | 4.119955  | -2.55564 | -0.06517 |
| H | 5.204157  | -2.68392 | 0.073372 |
| H | 3.961747  | -1.78002 | -0.8236  |
| H | 3.72694   | -3.48652 | -0.50354 |
| C | 4.374603  | -2.91169 | 4.918798 |
| H | 4.016016  | -2.40906 | 5.829744 |
| H | 5.457563  | -2.72913 | 4.83066  |
| H | 4.243323  | -3.9978  | 5.068482 |
| N | 4.398597  | 4.473294 | -0.53287 |
| N | 5.400566  | 5.323308 | -0.59938 |
| C | 6.773182  | 4.890518 | -0.7521  |
| H | 7.428196  | 5.770143 | -0.75901 |
| H | 6.921292  | 4.329055 | -1.69443 |
| H | 7.073813  | 4.236455 | 0.084155 |
| C | 5.057394  | 6.716865 | -0.80408 |

|   |          |          |          |
|---|----------|----------|----------|
| H | 5.199915 | 7.025879 | -1.85674 |
| H | 5.677049 | 7.365416 | -0.16462 |
| H | 4.001759 | 6.847807 | -0.53818 |

**Cartesian coordinates of 3 (B3LYP-D3(BJ)/def2-SVP, MCH, PCM model) in S<sub>1</sub> state**

*E* = -2603.034694 Hartrees

| Symbol | X        | Y        | Z        |
|--------|----------|----------|----------|
| C      | 2.178053 | 0.329467 | -0.28532 |
| N      | -0.0447  | -0.56873 | 0.051447 |
| S      | -1.69277 | 1.424846 | -0.00653 |
| O      | -4.27906 | 2.387298 | 0.075762 |
| B      | 1.490249 | -1.13415 | -0.0518  |
| C      | -5.10332 | 1.487761 | 0.137784 |
| S      | 1.819395 | 2.961517 | -0.26664 |
| O      | -6.36439 | -1.86803 | 0.306976 |
| C      | -6.58807 | 1.663279 | 0.18616  |
| C      | -7.33348 | 2.839431 | 0.171145 |
| H      | -6.83515 | 3.80943  | 0.117531 |
| C      | -8.72829 | 2.730901 | 0.226682 |
| H      | -9.34291 | 3.634056 | 0.216634 |
| C      | -9.35344 | 1.474321 | 0.295487 |
| H      | -10.4438 | 1.421274 | 0.337782 |
| C      | -8.59943 | 0.294516 | 0.310434 |
| H      | -9.07225 | -0.68813 | 0.363733 |
| C      | -7.21294 | 0.407316 | 0.254857 |
| C      | -6.17179 | -0.66736 | 0.255178 |
| C      | -4.85914 | 0.031957 | 0.180119 |
| C      | -1.26303 | -1.13227 | 0.09231  |
| H      | -1.36539 | -2.21556 | 0.124662 |
| C      | -2.32783 | -0.23897 | 0.091849 |
| C      | -3.68272 | -0.66032 | 0.158972 |
| H      | -3.80314 | -1.75063 | 0.201563 |
| C      | -0.08896 | 0.786916 | -0.04627 |
| C      | 1.197602 | 1.335152 | -0.19172 |
| C      | 3.46015  | 0.913705 | -0.38085 |
| H      | 4.39482  | 0.355582 | -0.44042 |
| C      | 3.445289 | 2.307883 | -0.40011 |
| C      | 4.57923  | 3.185304 | -0.51429 |
| H      | 5.564541 | 2.70596  | -0.57542 |
| C      | 1.375687 | -2.2707  | -1.22154 |
| C      | 1.538976 | -1.96999 | -2.6005  |
| C      | 1.397091 | -2.97029 | -3.57134 |
| H      | 1.536745 | -2.70623 | -4.62442 |
| C      | 1.067249 | -4.28809 | -3.24114 |
| C      | 0.858258 | -4.57243 | -1.8918  |
| H      | 0.571367 | -5.58821 | -1.60222 |

|   |          |          |          |
|---|----------|----------|----------|
| C | 1.001565 | -3.59944 | -0.88819 |
| C | 1.855772 | -0.57788 | -3.09932 |
| H | 2.840451 | -0.22809 | -2.7558  |
| H | 1.124907 | 0.164945 | -2.74794 |
| H | 1.856554 | -0.55194 | -4.19885 |
| C | 0.94397  | -5.35049 | -4.30397 |
| H | 1.936471 | -5.65781 | -4.67706 |
| H | 0.37387  | -4.98661 | -5.17393 |
| H | 0.442507 | -6.25102 | -3.91897 |
| C | 0.754221 | -4.0717  | 0.531256 |
| H | 0.16103  | -4.9985  | 0.5262   |
| H | 0.229512 | -3.33626 | 1.153756 |
| H | 1.697751 | -4.28134 | 1.058471 |
| C | 2.182778 | -1.60947 | 1.3587   |
| C | 3.452798 | -2.24401 | 1.260312 |
| C | 4.141614 | -2.64457 | 2.412382 |
| H | 5.113552 | -3.13596 | 2.299488 |
| C | 3.630853 | -2.43694 | 3.696481 |
| C | 2.406249 | -1.77543 | 3.792051 |
| H | 1.992112 | -1.56898 | 4.783781 |
| C | 1.688514 | -1.35011 | 2.66213  |
| C | 0.395996 | -0.61112 | 2.932774 |
| H | -0.4871  | -1.15544 | 2.564625 |
| H | 0.380788 | 0.385082 | 2.466898 |
| H | 0.257829 | -0.46728 | 4.013776 |
| C | 4.120381 | -2.55486 | -0.06389 |
| H | 5.204589 | -2.68249 | 0.07513  |
| H | 3.962022 | -1.77922 | -0.82226 |
| H | 3.728116 | -3.48597 | -0.50244 |
| C | 4.372454 | -2.91258 | 4.920112 |
| H | 4.012362 | -2.41126 | 5.831184 |
| H | 5.455251 | -2.72853 | 4.833081 |
| H | 4.24252  | -3.999   | 5.068652 |
| N | 4.39809  | 4.47369  | -0.53339 |
| N | 5.399487 | 5.323608 | -0.60086 |
| C | 6.772698 | 4.891383 | -0.75085 |
| H | 7.427026 | 5.771454 | -0.75915 |
| H | 6.921918 | 4.327963 | -1.69172 |
| H | 7.072705 | 4.239368 | 0.087232 |
| C | 5.056833 | 6.718185 | -0.79994 |
| H | 5.204713 | 7.032229 | -1.85026 |
| H | 5.673163 | 7.363708 | -0.15422 |
| H | 3.999883 | 6.847433 | -0.5386  |

**Cartesian coordinates of 3 (B3LYP-D3(BJ)/def2-SVP, toluene, PCM model) in S<sub>1</sub> state**

E = -2603.037023 Hartrees

| Symbol | X          | Y        | Z        |
|--------|------------|----------|----------|
| C      | 2.178319   | 0.329955 | -0.28419 |
| N      | -0.044751  | -0.56857 | 0.05108  |
| S      | -1.692823  | 1.42506  | -0.00651 |
| O      | -4.280475  | 2.387241 | 0.075576 |
| B      | 1.490113   | -1.13375 | -0.05134 |
| C      | -5.104439  | 1.487132 | 0.137239 |
| S      | 1.819459   | 2.961977 | -0.26717 |
| O      | -6.36372   | -1.86922 | 0.305457 |
| C      | -6.589158  | 1.662079 | 0.185332 |
| C      | -7.33525   | 2.837787 | 0.170401 |
| H      | -6.837958  | 3.80832  | 0.11707  |
| C      | -8.730095  | 2.728462 | 0.225651 |
| H      | -9.345165  | 3.631276 | 0.215651 |
| C      | -9.354553  | 1.471542 | 0.294105 |
| H      | -10.444894 | 1.417834 | 0.336186 |
| C      | -8.599822  | 0.292109 | 0.308972 |
| H      | -9.072569  | -0.69057 | 0.362011 |
| C      | -7.213389  | 0.405685 | 0.253675 |
| C      | -6.171583  | -0.6681  | 0.253952 |
| C      | -4.859453  | 0.031588 | 0.179306 |
| C      | -1.262959  | -1.1321  | 0.091864 |
| H      | -1.365706  | -2.21534 | 0.124508 |
| C      | -2.327919  | -0.23882 | 0.091376 |
| C      | -3.682526  | -0.66032 | 0.158217 |
| H      | -3.802235  | -1.75066 | 0.200561 |
| C      | -0.088856  | 0.787385 | -0.04629 |
| C      | 1.197475   | 1.335574 | -0.19118 |
| C      | 3.46029    | 0.913931 | -0.37993 |
| H      | 4.3951     | 0.356091 | -0.43977 |
| C      | 3.445699   | 2.308403 | -0.40001 |
| C      | 4.579271   | 3.185567 | -0.51459 |
| H      | 5.5648     | 2.706949 | -0.57568 |
| C      | 1.377318   | -2.26968 | -1.22214 |
| C      | 1.54116    | -1.96768 | -2.60084 |
| C      | 1.401808   | -2.96755 | -3.57264 |
| H      | 1.541858   | -2.70243 | -4.6254  |
| C      | 1.073947   | -4.28624 | -3.24375 |
| C      | 0.864017   | -4.57184 | -1.89476 |
| H      | 0.578298   | -5.58824 | -1.60619 |
| C      | 1.004753   | -3.59925 | -0.89029 |
| C      | 1.855704   | -0.57466 | -3.0986  |
| H      | 2.839959   | -0.22373 | -2.75507 |
| H      | 1.123814   | 0.166675 | -2.74624 |

|   |           |          |          |
|---|-----------|----------|----------|
| H | 1.856062  | -0.54782 | -4.19811 |
| C | 0.953544  | -5.34814 | -4.30747 |
| H | 1.947007  | -5.65437 | -4.67887 |
| H | 0.384913  | -4.98417 | -5.17833 |
| H | 0.452165  | -6.24932 | -3.92391 |
| C | 0.756158  | -4.07289 | 0.528456 |
| H | 0.16399   | -5.00031 | 0.521933 |
| H | 0.229708  | -3.33844 | 1.150601 |
| H | 1.699358  | -4.28192 | 1.056517 |
| C | 2.181307  | -1.60996 | 1.359662 |
| C | 3.451876  | -2.2437  | 1.262438 |
| C | 4.13971   | -2.64468 | 2.415029 |
| H | 5.112116  | -3.13532 | 2.302887 |
| C | 3.627351  | -2.4383  | 3.698772 |
| C | 2.402104  | -1.77768 | 3.793317 |
| H | 1.986633  | -1.57226 | 4.784711 |
| C | 1.6853    | -1.35205 | 2.662789 |
| C | 0.391668  | -0.61467 | 2.932727 |
| H | -0.490403 | -1.16017 | 2.5639   |
| H | 0.375331  | 0.381533 | 2.466959 |
| H | 0.252655  | -0.47125 | 4.013675 |
| C | 4.121194  | -2.55337 | -0.06117 |
| H | 5.205404  | -2.67973 | 0.078859 |
| H | 3.962577  | -1.77775 | -0.81944 |
| H | 3.730419  | -3.48499 | -0.50002 |
| C | 4.368002  | -2.91412 | 4.922946 |
| H | 4.005154  | -2.41509 | 5.834166 |
| H | 5.450516  | -2.72749 | 4.837969 |
| H | 4.24042   | -4.00108 | 5.069513 |
| N | 4.39715   | 4.474374 | -0.53461 |
| N | 5.397394  | 5.324096 | -0.60401 |
| C | 6.771851  | 4.893001 | -0.74794 |
| H | 7.424791  | 5.773964 | -0.75902 |
| H | 6.923624  | 4.325436 | -1.68563 |
| H | 7.070279  | 4.245329 | 0.094091 |
| C | 5.055833  | 6.720649 | -0.79193 |
| H | 5.215276  | 7.044781 | -1.83724 |
| H | 5.664896  | 7.359962 | -0.13324 |
| H | 3.996116  | 6.846558 | -0.54059 |

**Cartesian coordinates of 3 (B3LYP-D3(BJ)/def2-SVP, CHCl<sub>3</sub>, PCM model) in S<sub>1</sub> state**

$E = -2603.044898$  Hartrees

| Symbol | X        | Y        | Z        |
|--------|----------|----------|----------|
| C      | 2.179324 | 0.330092 | -0.28244 |
| N      | -0.04508 | -0.56817 | 0.049625 |
| S      | -1.69244 | 1.426121 | -0.00872 |

|   |          |          |          |
|---|----------|----------|----------|
| O | -4.28474 | 2.38846  | 0.073649 |
| B | 1.489235 | -1.13331 | -0.04988 |
| C | -5.10781 | 1.486555 | 0.135079 |
| S | 1.821036 | 2.962179 | -0.27302 |
| O | -6.36166 | -1.87121 | 0.303237 |
| C | -6.59239 | 1.659924 | 0.182551 |
| C | -7.34047 | 2.834298 | 0.167148 |
| H | -6.84641 | 3.806444 | 0.11384  |
| C | -8.73543 | 2.722707 | 0.221911 |
| H | -9.3518  | 3.624499 | 0.211508 |
| C | -9.35784 | 1.464846 | 0.290362 |
| H | -10.448  | 1.409228 | 0.332057 |
| C | -8.60097 | 0.286482 | 0.305724 |
| H | -9.07376 | -0.69615 | 0.358808 |
| C | -7.2147  | 0.402288 | 0.250926 |
| C | -6.17089 | -0.66871 | 0.251693 |
| C | -4.86039 | 0.031913 | 0.177439 |
| C | -1.26302 | -1.13122 | 0.091285 |
| H | -1.36738 | -2.21421 | 0.126564 |
| C | -2.32821 | -0.23764 | 0.089919 |
| C | -3.68197 | -0.65914 | 0.156925 |
| H | -3.79966 | -1.74951 | 0.199897 |
| C | -0.08816 | 0.788705 | -0.04822 |
| C | 1.197607 | 1.336017 | -0.19214 |
| C | 3.461175 | 0.912412 | -0.37954 |
| H | 4.396146 | 0.35497  | -0.44024 |
| C | 3.448215 | 2.307912 | -0.40345 |
| C | 4.58091  | 3.183581 | -0.51967 |
| H | 5.566977 | 2.706984 | -0.58055 |
| C | 1.381237 | -2.26855 | -1.22273 |
| C | 1.546789 | -1.96411 | -2.60099 |
| C | 1.413784 | -2.96343 | -3.57475 |
| H | 1.555047 | -2.69626 | -4.62683 |
| C | 1.090661 | -4.28423 | -3.24853 |
| C | 0.878009 | -4.5722  | -1.9002  |
| H | 0.594844 | -5.58989 | -1.61364 |
| C | 1.012272 | -3.60004 | -0.89408 |
| C | 1.855959 | -0.56918 | -3.09702 |
| H | 2.83941  | -0.21569 | -2.75397 |
| H | 1.121831 | 0.168763 | -2.74231 |
| H | 1.854917 | -0.54081 | -4.19647 |
| C | 0.977799 | -5.34554 | -4.31378 |
| H | 1.974005 | -5.65285 | -4.67686 |
| H | 0.417605 | -4.98025 | -5.18946 |
| H | 0.47226  | -6.2463  | -3.93475 |
| C | 0.760057 | -4.0763  | 0.52306  |

|   |          |          |          |
|---|----------|----------|----------|
| H | 0.169284 | -5.00449 | 0.513233 |
| H | 0.230166 | -3.34345 | 1.143969 |
| H | 1.702426 | -4.28504 | 1.052837 |
| C | 2.176448 | -1.61053 | 1.363293 |
| C | 3.44872  | -2.24198 | 1.270357 |
| C | 4.134246 | -2.64178 | 2.425024 |
| H | 5.108101 | -3.13017 | 2.315711 |
| C | 3.617674 | -2.43651 | 3.707558 |
| C | 2.39029  | -1.77878 | 3.798208 |
| H | 1.971145 | -1.57468 | 4.788345 |
| C | 1.675584 | -1.35472 | 2.665259 |
| C | 0.378285 | -0.62249 | 2.932295 |
| H | -0.50041 | -1.17255 | 2.562367 |
| H | 0.357809 | 0.373039 | 2.465395 |
| H | 0.23689  | -0.47888 | 4.012904 |
| C | 4.122787 | -2.55063 | -0.05107 |
| H | 5.207012 | -2.67292 | 0.091766 |
| H | 3.963153 | -1.77646 | -0.81045 |
| H | 3.736265 | -3.48465 | -0.48869 |
| C | 4.356376 | -2.90986 | 4.933995 |
| H | 3.983825 | -2.41782 | 5.845034 |
| H | 5.437521 | -2.71297 | 4.855189 |
| H | 4.238667 | -3.99855 | 5.075617 |
| N | 4.396006 | 4.473953 | -0.54336 |
| N | 5.392669 | 5.322452 | -0.62088 |
| C | 6.77121  | 4.894662 | -0.74145 |
| H | 7.419646 | 5.778301 | -0.76606 |
| H | 6.931774 | 4.308914 | -1.6654  |
| H | 7.063702 | 4.2657   | 0.116847 |
| C | 5.056141 | 6.726154 | -0.76319 |
| H | 5.268526 | 7.092323 | -1.78396 |
| H | 5.629933 | 7.337813 | -0.04856 |
| H | 3.98503  | 6.839757 | -0.55969 |

**Cartesian coordinates of 3 (B3LYP-D3(BJ)/def2-SVP, THF, PCM model) in S<sub>1</sub> state**

$E = -2603.048431$  Hartrees

| Symbol | X         | Y        | Z        |
|--------|-----------|----------|----------|
| C      | 2.179688  | 0.329128 | -0.28316 |
| N      | -0.04534  | -0.56809 | 0.049663 |
| S      | -1.691898 | 1.426869 | -0.00958 |
| O      | -4.286277 | 2.389906 | 0.073095 |
| B      | 1.488466  | -1.13376 | -0.04917 |
| C      | -5.10905  | 1.487313 | 0.134705 |
| S      | 1.822653  | 2.961362 | -0.27741 |
| O      | -6.360957 | -1.87079 | 0.304549 |
| C      | -6.593553 | 1.660207 | 0.181454 |

|   |            |          |          |
|---|------------|----------|----------|
| C | -7.342324  | 2.834094 | 0.164923 |
| H | -6.849509  | 3.806835 | 0.111178 |
| C | -8.737372  | 2.721756 | 0.219129 |
| H | -9.354183  | 3.623177 | 0.207823 |
| C | -9.359084  | 1.463612 | 0.288144 |
| H | -10.449177 | 1.407347 | 0.329369 |
| C | -8.601456  | 0.285608 | 0.304665 |
| H | -9.074466  | -0.6969  | 0.358212 |
| C | -7.215223  | 0.402157 | 0.250434 |
| C | -6.170655  | -0.66774 | 0.252339 |
| C | -4.860754  | 0.03308  | 0.178074 |
| C | -1.263285  | -1.13061 | 0.092546 |
| H | -1.368587  | -2.21344 | 0.129777 |
| C | -2.328348  | -0.23663 | 0.090631 |
| C | -3.681803  | -0.65782 | 0.158267 |
| H | -3.798813  | -1.74815 | 0.202349 |
| C | -0.087641  | 0.789142 | -0.04911 |
| C | 1.198015   | 1.335572 | -0.19353 |
| C | 3.461635   | 0.910152 | -0.38223 |
| H | 4.396385   | 0.352486 | -0.44429 |
| C | 3.449942   | 2.306133 | -0.40809 |
| C | 4.582455   | 3.180656 | -0.52622 |
| H | 5.568396   | 2.704523 | -0.5895  |
| C | 1.381324   | -2.26955 | -1.22193 |
| C | 1.546769   | -1.96516 | -2.60036 |
| C | 1.41485    | -2.96484 | -3.57415 |
| H | 1.555998   | -2.69766 | -4.62624 |
| C | 1.092957   | -4.28605 | -3.24786 |
| C | 0.880046   | -4.57394 | -1.89942 |
| H | 0.597378   | -5.59175 | -1.61277 |
| C | 1.013198   | -3.60137 | -0.8934  |
| C | 1.854439   | -0.57003 | -3.0969  |
| H | 2.83814    | -0.2161  | -2.75507 |
| H | 1.120256   | 0.167337 | -2.74115 |
| H | 1.851998   | -0.54183 | -4.19634 |
| C | 0.981754   | -5.34784 | -4.31285 |
| H | 1.978747   | -5.65892 | -4.67055 |
| H | 0.427631   | -4.98123 | -5.19178 |
| H | 0.471308   | -6.24657 | -3.9356  |
| C | 0.760383   | -4.07754 | 0.523625 |
| H | 0.169126   | -5.00537 | 0.513624 |
| H | 0.230533   | -3.34438 | 1.144111 |
| H | 1.702795   | -4.28703 | 1.053122 |
| C | 2.174914   | -1.61011 | 1.364959 |
| C | 3.447885   | -2.24067 | 1.273588 |
| C | 4.133648   | -2.63807 | 2.429076 |

|   |           |          |          |
|---|-----------|----------|----------|
| H | 5.108077  | -3.12552 | 2.32076  |
| C | 3.616565  | -2.43127 | 3.711318 |
| C | 2.388158  | -1.775   | 3.800502 |
| H | 1.968316  | -1.57017 | 4.790196 |
| C | 1.673094  | -1.35353 | 2.666553 |
| C | 0.374153  | -0.62372 | 2.932585 |
| H | -0.503091 | -1.17632 | 2.563089 |
| H | 0.351235  | 0.371162 | 2.464473 |
| H | 0.232327  | -0.47931 | 4.013022 |
| C | 4.122755  | -2.55079 | -0.04708 |
| H | 5.207112  | -2.67107 | 0.096094 |
| H | 3.961944  | -1.77838 | -0.80793 |
| H | 3.737702  | -3.48657 | -0.4823  |
| C | 4.355988  | -2.9012  | 4.93869  |
| H | 3.977764  | -2.4134  | 5.849637 |
| H | 5.435857  | -2.69642 | 4.862467 |
| H | 4.246166  | -3.99096 | 5.078135 |
| N | 4.396914  | 4.471875 | -0.5498  |
| N | 5.392152  | 5.319343 | -0.63377 |
| C | 6.771958  | 4.892447 | -0.74696 |
| H | 7.418574  | 5.776863 | -0.78282 |
| H | 6.93296   | 4.295759 | -1.66328 |
| H | 7.064579  | 4.274558 | 0.119447 |
| C | 5.058782  | 6.726807 | -0.74563 |
| H | 5.300786  | 7.119253 | -1.74934 |
| H | 5.611891  | 7.319106 | 0.00124  |
| H | 3.982378  | 6.834831 | -0.56928 |

**Cartesian coordinates of 3 (B3LYP-D3(BJ)/def2-SVP, CH<sub>2</sub>Cl<sub>2</sub>, PCM model) in S<sub>1</sub> state**

*E* = -2603.049545 Hartrees

| Symbol | X        | Y        | Z        |
|--------|----------|----------|----------|
| C      | 2.179776 | 0.328674 | -0.28358 |
| N      | -0.04544 | -0.56808 | 0.049848 |
| S      | -1.69167 | 1.427145 | -0.00969 |
| O      | -4.2867  | 2.390484 | 0.073068 |
| B      | 1.488159 | -1.13399 | -0.04894 |
| C      | -5.10941 | 1.487694 | 0.13474  |
| S      | 1.823302 | 2.960972 | -0.27889 |
| O      | -6.36078 | -1.87047 | 0.3053   |
| C      | -6.59388 | 1.660471 | 0.181143 |
| C      | -7.34284 | 2.834222 | 0.164098 |
| H      | -6.85039 | 3.807131 | 0.110173 |
| C      | -8.73792 | 2.721687 | 0.218027 |
| H      | -9.35485 | 3.623002 | 0.206309 |
| C      | -9.35945 | 1.463473 | 0.287274 |
| H      | -10.4495 | 1.407035 | 0.328265 |

|   |          |          |          |
|---|----------|----------|----------|
| C | -8.60161 | 0.285566 | 0.304322 |
| H | -9.07472 | -0.69688 | 0.358057 |
| C | -7.21538 | 0.402312 | 0.250372 |
| C | -6.1706  | -0.66726 | 0.252801 |
| C | -4.86087 | 0.033589 | 0.17855  |
| C | -1.26341 | -1.13039 | 0.093231 |
| H | -1.36904 | -2.21316 | 0.131157 |
| C | -2.32839 | -0.23624 | 0.091153 |
| C | -3.68177 | -0.6573  | 0.159046 |
| H | -3.79859 | -1.7476  | 0.203579 |
| C | -0.08745 | 0.789256 | -0.04927 |
| C | 1.198194 | 1.33534  | -0.19399 |
| C | 3.461776 | 0.909206 | -0.38353 |
| H | 4.396404 | 0.351406 | -0.44625 |
| C | 3.450565 | 2.30534  | -0.40997 |
| C | 4.583048 | 3.179436 | -0.52894 |
| H | 5.568877 | 2.703375 | -0.59353 |
| C | 1.381059 | -2.27006 | -1.22153 |
| C | 1.546313 | -1.96583 | -2.60006 |
| C | 1.414465 | -2.96569 | -3.57376 |
| H | 1.555463 | -2.69862 | -4.6259  |
| C | 1.092838 | -4.28696 | -3.24727 |
| C | 0.88001  | -4.57469 | -1.89874 |
| H | 0.597412 | -5.59247 | -1.61193 |
| C | 1.013088 | -3.60191 | -0.89287 |
| C | 1.853633 | -0.57072 | -3.09693 |
| H | 2.837517 | -0.21678 | -2.75567 |
| H | 1.11959  | 0.1666   | -2.74081 |
| H | 1.850595 | -0.54267 | -4.19637 |
| C | 0.981871 | -5.34899 | -4.31208 |
| H | 1.979017 | -5.6615  | -4.6681  |
| H | 0.429693 | -4.98194 | -5.19202 |
| H | 0.469724 | -6.24693 | -3.93527 |
| C | 0.760256 | -4.07789 | 0.524208 |
| H | 0.168642 | -5.00547 | 0.514338 |
| H | 0.230704 | -3.34448 | 1.144617 |
| H | 1.702748 | -4.28781 | 1.053428 |
| C | 2.174568 | -1.6099  | 1.365466 |
| C | 3.447744 | -2.2402  | 1.274482 |
| C | 4.133831 | -2.63655 | 2.430186 |
| H | 5.108431 | -3.1237  | 2.322101 |
| C | 3.616849 | -2.42897 | 3.712392 |
| C | 2.388105 | -1.77319 | 3.801209 |
| H | 1.968231 | -1.56793 | 4.790799 |
| C | 1.672679 | -1.35283 | 2.666994 |
| C | 0.373223 | -0.62382 | 2.932807 |

|   |          |          |          |
|---|----------|----------|----------|
| H | -0.50358 | -1.17728 | 2.563587 |
| H | 0.34943  | 0.370823 | 2.464238 |
| H | 0.23138  | -0.47907 | 4.013194 |
| C | 4.122626 | -2.55106 | -0.046   |
| H | 5.207049 | -2.67067 | 0.0971   |
| H | 3.961304 | -1.77937 | -0.80746 |
| H | 3.737967 | -3.4875  | -0.48019 |
| C | 4.356731 | -2.89752 | 4.940029 |
| H | 3.977507 | -2.41018 | 5.850795 |
| H | 5.436298 | -2.69112 | 4.863967 |
| H | 4.24864  | -3.98743 | 5.079591 |
| N | 4.39741  | 4.470941 | -0.55205 |
| N | 5.392221 | 5.318032 | -0.63847 |
| C | 6.772303 | 4.891309 | -0.75036 |
| H | 7.418385 | 5.775882 | -0.79043 |
| H | 6.932647 | 4.291044 | -1.66428 |
| H | 7.065621 | 4.277041 | 0.118438 |
| C | 5.059961 | 6.726661 | -0.73947 |
| H | 5.311311 | 7.12806  | -1.73713 |
| H | 5.606491 | 7.311923 | 0.017839 |
| H | 3.982068 | 6.833194 | -0.57167 |

**Cartesian coordinates of 3 (B3LYP-D3(BJ)/def2-SVP, acetone, PCM model) in S<sub>1</sub> state**

*E* = -2603.054009 Hartrees

| Symbol | X        | Y        | Z        |
|--------|----------|----------|----------|
| C      | 2.214658 | 0.316038 | -0.27255 |
| N      | -0.02398 | -0.55341 | 0.058058 |
| S      | -1.67091 | 1.451245 | 0.009026 |
| O      | -4.27817 | 2.426941 | 0.067494 |
| B      | 1.512743 | -1.14201 | -0.02941 |
| C      | -5.08683 | 1.51257  | 0.130584 |
| S      | 1.830004 | 2.951554 | -0.31456 |
| O      | -6.30425 | -1.83378 | 0.311147 |
| C      | -6.57371 | 1.680591 | 0.174444 |
| C      | -7.32676 | 2.842772 | 0.152408 |
| H      | -6.84239 | 3.81926  | 0.095742 |
| C      | -8.71932 | 2.720061 | 0.204765 |
| H      | -9.34238 | 3.6166   | 0.188981 |
| C      | -9.32729 | 1.464209 | 0.277183 |
| H      | -10.4164 | 1.397804 | 0.316965 |
| C      | -8.55983 | 0.294713 | 0.299319 |
| H      | -9.02484 | -0.69114 | 0.355913 |
| C      | -7.18216 | 0.424167 | 0.247005 |
| C      | -6.12103 | -0.63051 | 0.254204 |
| C      | -4.83163 | 0.074753 | 0.17937  |

|   |          |          |          |
|---|----------|----------|----------|
| C | -1.22064 | -1.1055  | 0.103333 |
| H | -1.33735 | -2.18702 | 0.142111 |
| C | -2.30264 | -0.19682 | 0.099756 |
| C | -3.63717 | -0.62238 | 0.165692 |
| H | -3.75572 | -1.71032 | 0.216304 |
| C | -0.05901 | 0.809922 | -0.03395 |
| C | 1.219221 | 1.33841  | -0.19568 |
| C | 3.471303 | 0.889583 | -0.38033 |
| H | 4.411189 | 0.339546 | -0.43438 |
| C | 3.462965 | 2.299173 | -0.43496 |
| C | 4.569752 | 3.159349 | -0.56684 |
| H | 5.563658 | 2.7059   | -0.63603 |
| C | 1.39465  | -2.26797 | -1.21086 |
| C | 1.552812 | -1.95559 | -2.5836  |
| C | 1.404769 | -2.94174 | -3.56293 |
| H | 1.53872  | -2.66476 | -4.6127  |
| C | 1.076973 | -4.25807 | -3.24917 |
| C | 0.871919 | -4.55528 | -1.90633 |
| H | 0.580337 | -5.57204 | -1.62726 |
| C | 1.019411 | -3.59725 | -0.89633 |
| C | 1.870942 | -0.56496 | -3.07891 |
| H | 2.880274 | -0.24238 | -2.78848 |
| H | 1.175812 | 0.187532 | -2.68206 |
| H | 1.811179 | -0.52698 | -4.17523 |
| C | 0.953639 | -5.31031 | -4.31774 |
| H | 1.939968 | -5.72958 | -4.57626 |
| H | 0.526721 | -4.89646 | -5.243   |
| H | 0.319416 | -6.14573 | -3.98877 |
| C | 0.764796 | -4.08751 | 0.512616 |
| H | 0.177841 | -5.01619 | 0.489576 |
| H | 0.227772 | -3.36421 | 1.13672  |
| H | 1.705198 | -4.29975 | 1.041914 |
| C | 2.172101 | -1.63255 | 1.389618 |
| C | 3.449249 | -2.24618 | 1.309366 |
| C | 4.131067 | -2.6351  | 2.463322 |
| H | 5.113431 | -3.10623 | 2.360171 |
| C | 3.60344  | -2.44119 | 3.738084 |
| C | 2.365946 | -1.81375 | 3.818234 |
| H | 1.932191 | -1.62566 | 4.804535 |
| C | 1.653916 | -1.40158 | 2.684044 |
| C | 0.330288 | -0.72144 | 2.952278 |
| H | -0.52478 | -1.32248 | 2.609815 |
| H | 0.253149 | 0.261606 | 2.469115 |
| H | 0.19817  | -0.56405 | 4.030884 |
| C | 4.135745 | -2.54796 | -0.00421 |
| H | 5.218552 | -2.66011 | 0.14685  |

|   |          |          |          |
|---|----------|----------|----------|
| H | 3.975208 | -1.7771  | -0.76539 |
| H | 3.76131  | -3.48619 | -0.44073 |
| C | 4.345996 | -2.89222 | 4.966902 |
| H | 3.889074 | -2.4913  | 5.882489 |
| H | 5.398449 | -2.57116 | 4.940998 |
| H | 4.34864  | -3.99115 | 5.050005 |
| N | 4.364412 | 4.460843 | -0.60115 |
| N | 5.340769 | 5.299201 | -0.71968 |
| C | 6.725212 | 4.892003 | -0.82306 |
| H | 7.351386 | 5.785315 | -0.91358 |
| H | 6.880533 | 4.254478 | -1.70901 |
| H | 7.034244 | 4.326616 | 0.071571 |
| C | 5.008565 | 6.708306 | -0.74616 |
| H | 5.337575 | 7.16521  | -1.69291 |
| H | 5.500771 | 7.236439 | 0.085776 |
| H | 3.922297 | 6.802582 | -0.65038 |

**Cartesian coordinates of 3 (B3LYP-D3(BJ)/def2-SVP, EtOH, PCM model) in S<sub>1</sub> state**

*E* = -2603.053361 Hartrees

| Symbol | X        | Y        | Z        |
|--------|----------|----------|----------|
| C      | 2.179982 | 0.326253 | -0.28648 |
| N      | -0.04592 | -0.56817 | 0.050874 |
| S      | -1.69067 | 1.428186 | -0.0107  |
| O      | -4.28787 | 2.393008 | 0.072153 |
| B      | 1.48682  | -1.13534 | -0.04808 |
| C      | -5.11043 | 1.489695 | 0.134784 |
| S      | 1.826091 | 2.958837 | -0.28634 |
| O      | -6.36039 | -1.86838 | 0.310622 |
| C      | -6.59479 | 1.662288 | 0.179887 |
| C      | -7.34423 | 2.835656 | 0.160094 |
| H      | -6.85286 | 3.809023 | 0.104729 |
| C      | -8.73943 | 2.722686 | 0.213161 |
| H      | -9.35664 | 3.62371  | 0.199274 |
| C      | -9.3605  | 1.464377 | 0.284257 |
| H      | -10.4505 | 1.40753  | 0.324493 |
| C      | -8.60211 | 0.286709 | 0.304111 |
| H      | -9.07571 | -0.69543 | 0.359318 |
| C      | -7.21588 | 0.403895 | 0.251033 |
| C      | -6.17049 | -0.6647  | 0.256144 |
| C      | -4.86124 | 0.036039 | 0.181298 |
| C      | -1.26406 | -1.12953 | 0.0968   |
| H      | -1.37098 | -2.21203 | 0.138051 |
| C      | -2.32859 | -0.23462 | 0.093791 |
| C      | -3.68175 | -0.65495 | 0.163256 |
| H      | -3.79808 | -1.74513 | 0.210352 |

|   |          |          |          |
|---|----------|----------|----------|
| C | -0.08669 | 0.789426 | -0.0504  |
| C | 1.199016 | 1.333951 | -0.19697 |
| C | 3.462275 | 0.904702 | -0.39042 |
| H | 4.396282 | 0.346139 | -0.45583 |
| C | 3.453058 | 2.301348 | -0.41938 |
| C | 4.585549 | 3.173741 | -0.54201 |
| H | 5.570791 | 2.697731 | -0.61254 |
| C | 1.378913 | -2.27326 | -1.21909 |
| C | 1.543118 | -1.97079 | -2.5983  |
| C | 1.410336 | -2.972   | -3.57077 |
| H | 1.550552 | -2.7063  | -4.62336 |
| C | 1.088805 | -4.29299 | -3.2424  |
| C | 0.876733 | -4.57891 | -1.89321 |
| H | 0.593812 | -5.59617 | -1.60488 |
| C | 1.010759 | -3.60469 | -0.88867 |
| C | 1.85013  | -0.57644 | -3.09758 |
| H | 2.835071 | -0.22295 | -2.75896 |
| H | 1.117289 | 0.16162  | -2.74054 |
| H | 1.844659 | -0.54983 | -4.19703 |
| C | 0.977309 | -5.35659 | -4.30563 |
| H | 1.974519 | -5.67455 | -4.65663 |
| H | 0.431112 | -4.98854 | -5.18882 |
| H | 0.459427 | -6.25138 | -3.9292  |
| C | 0.758396 | -4.07871 | 0.529095 |
| H | 0.164304 | -5.00467 | 0.520805 |
| H | 0.231384 | -3.34331 | 1.149212 |
| H | 1.701357 | -4.29114 | 1.056642 |
| C | 2.173885 | -1.60843 | 1.367342 |
| C | 3.44769  | -2.23803 | 1.277524 |
| C | 4.135927 | -2.62898 | 2.433949 |
| H | 5.111023 | -3.11525 | 2.326534 |
| C | 3.620468 | -2.41666 | 3.716186 |
| C | 2.390533 | -1.76269 | 3.80384  |
| H | 1.971336 | -1.5546  | 4.793126 |
| C | 1.672779 | -1.34794 | 2.668703 |
| C | 0.371571 | -0.6217  | 2.933862 |
| H | -0.50376 | -1.17863 | 2.566533 |
| H | 0.344268 | 0.371712 | 2.462895 |
| H | 0.230218 | -0.47493 | 4.014027 |
| C | 4.121507 | -2.55332 | -0.04244 |
| H | 5.206205 | -2.67094 | 0.099752 |
| H | 3.95823  | -1.78494 | -0.80675 |
| H | 3.737499 | -3.49239 | -0.47166 |
| C | 4.363358 | -2.87818 | 4.944721 |
| H | 3.978196 | -2.39477 | 5.855038 |
| H | 5.440982 | -2.66142 | 4.869855 |

|   |          |          |          |
|---|----------|----------|----------|
| H | 4.266058 | -3.96914 | 5.083741 |
| N | 4.399848 | 4.466269 | -0.56251 |
| N | 5.393069 | 5.311976 | -0.6597  |
| C | 6.773966 | 4.885712 | -0.76801 |
| H | 7.417933 | 5.7706   | -0.82692 |
| H | 6.930294 | 4.27024  | -1.67179 |
| H | 7.071564 | 4.286943 | 0.110351 |
| C | 5.065566 | 6.72457  | -0.71379 |
| H | 5.356615 | 7.163728 | -1.68356 |
| H | 5.583029 | 7.27811  | 0.087143 |
| H | 3.982181 | 6.826498 | -0.58298 |

**Cartesian coordinates of 3 (B3LYP-D3(BJ)/def2-SVP, MeCN, PCM model) in S<sub>1</sub> state**

$E = -2603.054059$  Hartrees

| Symbol | X        | Y        | Z        |
|--------|----------|----------|----------|
| C      | 2.180026 | 0.32573  | -0.28699 |
| N      | -0.04601 | -0.56821 | 0.051136 |
| S      | -1.69046 | 1.42837  | -0.01092 |
| O      | -4.28805 | 2.393504 | 0.071952 |
| B      | 1.486556 | -1.13566 | -0.04789 |
| C      | -5.11059 | 1.490113 | 0.134809 |
| S      | 1.826675 | 2.958366 | -0.28769 |
| O      | -6.36034 | -1.86792 | 0.311764 |
| C      | -6.59493 | 1.662694 | 0.179688 |
| C      | -7.34443 | 2.836004 | 0.159354 |
| H      | -6.85325 | 3.809441 | 0.10368  |
| C      | -8.73966 | 2.72298  | 0.212287 |
| H      | -9.35691 | 3.62396  | 0.197976 |
| C      | -9.36067 | 1.464667 | 0.283782 |
| H      | -10.4507 | 1.407766 | 0.323898 |
| C      | -8.6022  | 0.287031 | 0.304188 |
| H      | -9.07591 | -0.69504 | 0.359712 |
| C      | -7.21596 | 0.404272 | 0.251246 |
| C      | -6.17049 | -0.66416 | 0.256879 |
| C      | -4.8613  | 0.036536 | 0.181881 |
| C      | -1.2642  | -1.12938 | 0.097559 |
| H      | -1.37138 | -2.21182 | 0.13949  |
| C      | -2.32863 | -0.23431 | 0.094339 |
| C      | -3.68176 | -0.65449 | 0.164135 |
| H      | -3.79801 | -1.74464 | 0.211774 |
| C      | -0.08653 | 0.789419 | -0.05059 |
| C      | 1.199202 | 1.333635 | -0.1975  |
| C      | 3.462398 | 0.903758 | -0.39164 |
| H      | 4.396271 | 0.345024 | -0.45755 |
| C      | 3.453575 | 2.300495 | -0.42108 |
| C      | 4.586077 | 3.172576 | -0.54439 |

|   |          |          |          |
|---|----------|----------|----------|
| H | 5.571212 | 2.696577 | -0.61594 |
| C | 1.378411 | -2.27389 | -1.21861 |
| C | 1.542488 | -1.97177 | -2.59795 |
| C | 1.409388 | -2.9732  | -3.5702  |
| H | 1.54952  | -2.70778 | -4.62286 |
| C | 1.087662 | -4.29409 | -3.24149 |
| C | 0.875686 | -4.57965 | -1.89218 |
| H | 0.592556 | -5.59677 | -1.60356 |
| C | 1.010034 | -3.60519 | -0.88788 |
| C | 1.849696 | -0.57761 | -3.09767 |
| H | 2.834879 | -0.22437 | -2.7595  |
| H | 1.117185 | 0.160715 | -2.7405  |
| H | 1.843835 | -0.55127 | -4.19712 |
| C | 0.975887 | -5.35795 | -4.30443 |
| H | 1.97304  | -5.67683 | -4.65477 |
| H | 0.430562 | -4.98972 | -5.18808 |
| H | 0.457094 | -6.25221 | -3.92799 |
| C | 0.757726 | -4.07883 | 0.530015 |
| H | 0.162831 | -5.00427 | 0.522026 |
| H | 0.231532 | -3.34291 | 1.150187 |
| H | 1.700756 | -4.29214 | 1.057123 |
| C | 2.173803 | -1.60822 | 1.367688 |
| C | 3.447708 | -2.23773 | 1.278024 |
| C | 4.136469 | -2.62753 | 2.434555 |
| H | 5.111643 | -3.11365 | 2.327216 |
| C | 3.621439 | -2.41416 | 3.716827 |
| C | 2.39128  | -1.76054 | 3.804322 |
| H | 1.972307 | -1.55182 | 4.79357  |
| C | 1.672962 | -1.34698 | 2.669045 |
| C | 0.371433 | -0.62127 | 2.934135 |
| H | -0.50363 | -1.17888 | 2.567231 |
| H | 0.343418 | 0.371893 | 2.462686 |
| H | 0.23023  | -0.47409 | 4.014262 |
| C | 4.121205 | -2.55397 | -0.04188 |
| H | 5.205946 | -2.67134 | 0.100081 |
| H | 3.957618 | -1.78619 | -0.80672 |
| H | 3.737177 | -3.49348 | -0.47013 |
| C | 4.365038 | -2.8742  | 4.945498 |
| H | 3.978831 | -2.39147 | 5.855724 |
| H | 5.442266 | -2.65545 | 4.870724 |
| H | 4.26985  | -3.96533 | 5.084527 |
| N | 4.400348 | 4.465276 | -0.56451 |
| N | 5.393254 | 5.310783 | -0.66371 |
| C | 6.774299 | 4.884609 | -0.77142 |
| H | 7.417863 | 5.769519 | -0.83385 |
| H | 6.929863 | 4.266318 | -1.67328 |

|   |          |          |          |
|---|----------|----------|----------|
| H | 7.072726 | 4.288758 | 0.10869  |
| C | 5.066567 | 6.72391  | -0.70956 |
| H | 5.365027 | 7.169604 | -1.67393 |
| H | 5.5784   | 7.271571 | 0.099102 |
| H | 3.982308 | 6.825323 | -0.58583 |

**Cartesian coordinates of 2 (B3LYP/def2-SVP, volume) in  $S_0$  state.**

$E = -2987.350817$  Hartrees

| Symbol | X         | Y         | Z         |
|--------|-----------|-----------|-----------|
| C      | -0.739979 | 1.069559  | -0.174509 |
| N      | 1.670706  | 0.98563   | 0.11471   |
| S      | 2.340121  | -1.517514 | 0.089845  |
| O      | 4.314195  | -3.47916  | 0.146677  |
| B      | 0.486381  | 2.15082   | -0.02444  |
| C      | 5.436701  | -3.000308 | 0.164803  |
| S      | -1.486323 | -1.475204 | -0.033622 |
| O      | 7.971994  | -0.456406 | 0.207092  |
| C      | 6.721145  | -3.769748 | 0.187434  |
| C      | 6.917938  | -5.149819 | 0.192132  |
| H      | 6.063044  | -5.829647 | 0.178334  |
| C      | 8.235119  | -5.623405 | 0.214859  |
| H      | 8.424171  | -6.699948 | 0.219064  |
| C      | 9.323524  | -4.733634 | 0.232341  |
| H      | 10.340765 | -5.133194 | 0.249784  |
| C      | 9.121238  | -3.34831  | 0.227661  |
| H      | 9.956786  | -2.644859 | 0.241017  |
| C      | 7.808612  | -2.881099 | 0.20503   |
| C      | 7.303252  | -1.470954 | 0.195292  |
| C      | 5.81393   | -1.569489 | 0.168936  |
| C      | 3.017138  | 0.980356  | 0.116488  |
| H      | 3.567742  | 1.920007  | 0.110092  |
| C      | 3.613366  | -0.274095 | 0.124948  |
| C      | 5.027315  | -0.454662 | 0.152064  |
| H      | 5.591576  | 0.487885  | 0.159623  |
| C      | 1.14982   | -0.265252 | 0.063091  |
| C      | -0.257114 | -0.241952 | -0.045866 |
| C      | -2.154666 | 1.051365  | -0.225111 |
| H      | -2.784393 | 1.939391  | -0.296224 |
| C      | -2.708854 | -0.224989 | -0.175935 |
| C      | -4.11326  | -0.553246 | -0.223949 |
| H      | -4.810163 | 0.294212  | -0.288361 |
| C      | 1.048635  | 3.064524  | -1.279867 |
| C      | 0.724904  | 2.80231   | -2.643328 |
| C      | 1.273605  | 3.580063  | -3.673327 |
| H      | 0.993669  | 3.353352  | -4.707381 |
| C      | 2.170537  | 4.62419   | -3.429642 |

|   |           |           |           |
|---|-----------|-----------|-----------|
| C | 2.513662  | 4.86305   | -2.099446 |
| H | 3.223659  | 5.664725  | -1.871576 |
| C | 1.980666  | 4.113772  | -1.034952 |
| C | -0.21064  | 1.691238  | -3.075044 |
| C | 2.757681  | 5.430944  | -4.562304 |
| C | 2.44686   | 4.529939  | 0.349819  |
| C | 0.077413  | 2.961894  | 1.361032  |
| C | -0.821803 | 4.062375  | 1.221414  |
| C | -1.268535 | 4.770043  | 2.346232  |
| H | -1.952782 | 5.612226  | 2.196735  |
| C | -0.874025 | 4.440193  | 3.645971  |
| C | -0.02543  | 3.342379  | 3.785767  |
| H | 0.28468   | 3.038524  | 4.790664  |
| C | 0.440386  | 2.598977  | 2.686855  |
| C | 1.324244  | 1.414284  | 3.023509  |
| C | -1.328719 | 4.56128   | -0.119558 |
| C | -1.351445 | 5.237054  | 4.835689  |
| N | -4.500479 | -1.787295 | -0.187291 |
| N | -5.792013 | -2.132738 | -0.220164 |
| C | -6.830061 | -1.138506 | -0.283677 |
| C | -8.810462 | 0.828472  | -0.405652 |
| C | -7.3491   | -0.596976 | 0.899211  |
| C | -7.296161 | -0.694224 | -1.5275   |
| C | -8.288141 | 0.2886    | -1.585461 |
| C | -8.340607 | 0.385761  | 0.835187  |
| C | -6.105644 | -3.5148   | -0.184878 |
| C | -6.739186 | -6.260553 | -0.115707 |
| C | -7.44752  | -3.938232 | -0.202393 |
| C | -5.082336 | -4.480692 | -0.13245  |
| C | -5.405847 | -5.83613  | -0.098296 |
| C | -7.752331 | -5.300872 | -0.167999 |
| H | -8.255167 | -3.207418 | -0.24235  |
| H | -8.800797 | -5.609991 | -0.182228 |
| H | -6.983572 | -7.324841 | -0.08894  |
| H | -4.598415 | -6.572108 | -0.05781  |
| H | -4.044567 | -4.153151 | -0.118999 |
| H | -6.974492 | -0.953497 | 1.861254  |
| H | -8.748251 | 0.805924  | 1.757839  |
| H | -9.586364 | 1.596469  | -0.453227 |
| H | -8.654976 | 0.632575  | -2.555595 |
| H | -6.881025 | -1.126463 | -2.440646 |
| H | -0.266669 | 1.64005   | -4.172616 |
| H | -1.234934 | 1.837608  | -2.699705 |
| H | 0.114434  | 0.703582  | -2.715717 |
| H | -1.55793  | 3.755626  | -0.828688 |
| H | -0.584327 | 5.199256  | -0.622004 |

|   |           |          |           |
|---|-----------|----------|-----------|
| H | 3.380397  | 5.10916  | 0.279498  |
| H | 2.624219  | 3.68812  | 1.031773  |
| H | 3.316281  | 6.303455 | -4.191231 |
| H | 1.973476  | 5.796304 | -5.245759 |
| H | 3.452936  | 4.824926 | -5.169133 |
| H | 1.702125  | 5.164561 | 0.855732  |
| H | -2.241244 | 5.161973 | 0.015984  |
| H | -0.913175 | 6.25033  | 4.842716  |
| H | -2.446814 | 5.364064 | 4.824565  |
| H | -1.077427 | 4.751692 | 5.784638  |
| H | 1.409756  | 1.299257 | 4.113845  |
| H | 2.348478  | 1.523441 | 2.633064  |
| H | 0.924671  | 0.467118 | 2.630192  |

**Cartesian coordinates of 3 (B3LYP/def2-SVP, volume) in  $S_0$  state.**

$E = -2604.140351$  Hartrees

| Symbol | X          | Y         | Z         |
|--------|------------|-----------|-----------|
| C      | 2.174044   | 0.336514  | -0.309766 |
| N      | -0.049179  | -0.567209 | 0.071852  |
| S      | -1.698472  | 1.42887   | -0.050464 |
| O      | -4.311775  | 2.398637  | 0.017052  |
| B      | 1.509645   | -1.142198 | -0.045014 |
| C      | -5.130252  | 1.498674  | 0.117813  |
| S      | 1.79501    | 2.965803  | -0.349774 |
| O      | -6.373332  | -1.858992 | 0.397937  |
| C      | -6.61709   | 1.66739   | 0.184193  |
| C      | -7.369561  | 2.840238  | 0.150025  |
| H      | -6.875561  | 3.810523  | 0.062115  |
| C      | -8.762571  | 2.727367  | 0.232274  |
| H      | -9.382012  | 3.627655  | 0.208702  |
| C      | -9.380584  | 1.469738  | 0.3453    |
| H      | -10.470399 | 1.413063  | 0.407693  |
| C      | -8.620684  | 0.294222  | 0.37882   |
| H      | -9.087001  | -0.689678 | 0.466706  |
| C      | -7.234566  | 0.411197  | 0.296815  |
| C      | -6.18789   | -0.660944 | 0.310885  |
| C      | -4.877384  | 0.04371   | 0.199411  |
| C      | -1.275018  | -1.11874  | 0.130259  |
| H      | -1.385648  | -2.200282 | 0.195426  |
| C      | -2.339411  | -0.225972 | 0.102323  |
| C      | -3.698178  | -0.644626 | 0.189307  |
| H      | -3.819328  | -1.733836 | 0.265505  |
| C      | -0.095307  | 0.782413  | -0.066976 |
| C      | 1.189696   | 1.335623  | -0.234651 |
| C      | 3.450602   | 0.935508  | -0.427048 |

|   |           |           |           |
|---|-----------|-----------|-----------|
| H | 4.391481  | 0.385729  | -0.478905 |
| C | 3.424617  | 2.327249  | -0.474831 |
| C | 4.559054  | 3.209698  | -0.602483 |
| H | 5.542737  | 2.725043  | -0.669887 |
| C | 1.372409  | -2.295886 | -1.21861  |
| C | 1.543092  | -2.020871 | -2.607199 |
| C | 1.370071  | -3.030285 | -3.565531 |
| H | 1.515244  | -2.780605 | -4.621709 |
| C | 1.003772  | -4.335185 | -3.223953 |
| C | 0.796     | -4.597395 | -1.870227 |
| H | 0.485477  | -5.602811 | -1.567576 |
| C | 0.970072  | -3.61874  | -0.875104 |
| C | 1.904769  | -0.650622 | -3.143584 |
| H | 2.896886  | -0.315882 | -2.804828 |
| H | 1.191165  | 0.125694  | -2.829839 |
| H | 1.918446  | -0.659643 | -4.243701 |
| C | 0.844245  | -5.405132 | -4.276577 |
| H | 1.824869  | -5.744945 | -4.653889 |
| H | 0.27799   | -5.035369 | -5.146985 |
| H | 0.320137  | -6.288272 | -3.880719 |
| C | 0.722616  | -4.090067 | 0.547925  |
| H | 0.104873  | -5.001382 | 0.545102  |
| H | 0.222509  | -3.347503 | 1.18298   |
| H | 1.663934  | -4.33256  | 1.066566  |
| C | 2.230124  | -1.612127 | 1.371413  |
| C | 3.505689  | -2.242678 | 1.266892  |
| C | 4.215064  | -2.623669 | 2.415757  |
| H | 5.188818  | -3.109526 | 2.2921    |
| C | 3.726963  | -2.403649 | 3.705819  |
| C | 2.498044  | -1.750684 | 3.809644  |
| H | 2.096975  | -1.534496 | 4.805156  |
| C | 1.75693   | -1.345265 | 2.686635  |
| C | 0.461419  | -0.616436 | 2.985099  |
| H | -0.427269 | -1.17216  | 2.645991  |
| H | 0.421464  | 0.379242  | 2.518114  |
| H | 0.348867  | -0.46803  | 4.068955  |
| C | 4.170919  | -2.568714 | -0.058113 |
| H | 5.256338  | -2.692311 | 0.079375  |
| H | 4.013047  | -1.802324 | -0.826965 |
| H | 3.784275  | -3.507564 | -0.48649  |
| C | 4.489423  | -2.858858 | 4.926362  |
| H | 4.212009  | -2.276103 | 5.81841   |
| H | 5.577752  | -2.765225 | 4.7829    |
| H | 4.285289  | -3.920394 | 5.154227  |
| N | 4.386176  | 4.496527  | -0.633536 |
| N | 5.388781  | 5.34483   | -0.778149 |

|   |          |          |           |
|---|----------|----------|-----------|
| C | 6.770896 | 4.913749 | -0.789075 |
| H | 7.418365 | 5.785782 | -0.946627 |
| H | 6.95355  | 4.195503 | -1.607007 |
| H | 7.060569 | 4.425506 | 0.162486  |
| C | 5.076055 | 6.745147 | -0.565109 |
| H | 5.622348 | 7.376725 | -1.28405  |
| H | 5.333195 | 7.080539 | 0.458637  |
| H | 3.997645 | 6.878573 | -0.714995 |

## 5. References

1. Lakowicz, J.R. *Principles of Fluorescence Spectroscopy*; Kluwer Academic/Plenum Publishers: New York, 1999
2. a) N. G. Connelly, W. E. Geiger *Chem. Rev.*, **1996**, 96, 877-910; b) W. N. Hansen, G. J. Hansen *Phys. Rev. A* **1987**, 36, 1396-1402; c) C. M. Cardona, W. Li, A. E. Kaifer, D. Stockdale, G. C. Bazan, *Adv. Mater.* **2011**, 23, 2367-2371.
3. M. W. Wong, K. B. Wiberg, M. J. Frisch, *J. Comp. Chem.* **1995**, 16, 385-394.
4. Becke, A. D. Density-Functional Exchange-Energy Approximation with Correct Asymptotic Behaviour. *Phys. Rev. A* **1988**, 38, 3098–3100
5. Lee, C.; Yang, W.; Parr, R.G. Development of the Colle-Salvetti Correlation-Energy Formula into a Functional of the Electron Density. *Phys. Rev. B* **1988**, 37, 785–789.
6. Becke, A. D. Density-Functional Thermochemistry. III. The Role of Exact Exchange. *J. Chem. Phys.* **1993**, 98, 5648–5652.
7. Weigend, F.; Ahlrichs, R. Balanced Basis Sets of Split Valence, Triple Zeta Valence and Quadruple Zeta Valence Quality for H to Rn: Design and Assessment of Accuracy. *Phys. Chem. Chem. Phys.* **2005**, 7, 3297–3305.
